# Supplementary material for: Straight from the bottle! Wine and juice dicarboxylic acids as templates for supramolecular cage self-assembly
Source: Royal Society of Chemistry journal article supplement (doi:10.1039/d1cc03804d), 2021-01-01
Supplement: d1cc03804d1.pdf [file d1cc03804d1.pdf]

## Supporting Information for

# Straight from the Bottle! Wines and Juices Dicarboxylic Acids as Templates for Supramolecular Cage Self-Assembly

Authors: Federico Begato,<sup>1</sup> Roberto Penasa,<sup>1</sup> Giulia M. Licini,<sup>1</sup> and Cristiano Zonta<sup>1\*</sup>

<sup>1</sup> Department of Chemical Sciences, University of Padova, via Marzolo 1, 35131 Padova

\*Correspondence to: [cristiano.zonta@unipd.it](mailto:cristiano.zonta@unipd.it)

## Contents

|                                                                                                                                                                    |    |
|--------------------------------------------------------------------------------------------------------------------------------------------------------------------|----|
| Supporting Information for.....                                                                                                                                    | 1  |
| 1 General Methods .....                                                                                                                                            | 5  |
| 2 Synthesis and Characterization.....                                                                                                                              | 6  |
| 2.1 Synthesis of 1-(5-bromopyridin-2-yl)ethan-1-ol (4) .....                                                                                                       | 6  |
| 2.2 Synthesis of 1-(5-bromopyridin-2-yl)ethyl 4-methylbenzenesulfonate (5).....                                                                                    | 6  |
| 2.3 Synthesis of 2-(1-azidoethyl)-5-bromopyridine (6).....                                                                                                         | 7  |
| 2.4 Synthesis of 1-(5-bromopyridin-2-yl)ethan-1-amine (7).....                                                                                                     | 7  |
| 2.5 Synthesis of <i>R</i> -(+)-1-(5-bromopyridin-2-yl)ethan-1-amine (( <i>R</i> )-7) .....                                                                         | 8  |
| 2.6 Synthesis of <i>R</i> -(+)-1-(5-bromopyridin-2-yl)- <i>N,N</i> -bis((5-bromopyridin-2-yl)methyl)ethan-1-amine (( <i>R</i> )-8) 8                               |    |
| 2.7 Synthesis of ( <i>R</i> )-4,4'-((((1-(5-(4-formylphenyl)pyridin-2-yl)ethyl)azanediyl)bis(methylene))bis(pyridine-6,3-diyl)dibenzaldehyde (( <i>R</i> )-9)..... | 9  |
| 2.8 Synthesis of complex ( <i>R</i> )-1b .....                                                                                                                     | 10 |
| 2.9 Synthesis of Cages X@2a and X@( <i>R,R</i> )-2b. ....                                                                                                          | 11 |
| 2.10 Synthesis of Cages in the presence of complex mixtures.....                                                                                                   | 11 |
| 2.10.1 L-Tar@2a .....                                                                                                                                              | 12 |
| 2.10.2 L-Mal@2a .....                                                                                                                                              | 12 |
| 2.10.3 Suc@2a.....                                                                                                                                                 | 12 |
| 2.10.4 Cit@2a.....                                                                                                                                                 | 12 |
| 2.10.5 L-Tar@( <i>R,R</i> )-2b .....                                                                                                                               | 13 |
| 2.10.6 D-Tar@( <i>R,R</i> )-2b.....                                                                                                                                | 13 |
| 2.10.7 L-Mal@( <i>R,R</i> )-2b .....                                                                                                                               | 13 |
| 2.10.8 D-Mal@( <i>R,R</i> )-2b.....                                                                                                                                | 13 |
| 2.10.9 Suc@( <i>R,R</i> )-2b.....                                                                                                                                  | 13 |
| 3 Self Assembly with different amount of Wine .....                                                                                                                | 15 |
| 3.1 Addition of 15 $\mu$ L of wine.....                                                                                                                            | 15 |

|      |                                                                                                                                                       |    |
|------|-------------------------------------------------------------------------------------------------------------------------------------------------------|----|
| 3.2  | Addition of 30 $\mu$ L of wine .....                                                                                                                  | 16 |
| 3.3  | Addition of 50 $\mu$ L of wine .....                                                                                                                  | 16 |
| 3.4  | Addition of 75 $\mu$ L of wine .....                                                                                                                  | 17 |
| 3.5  | Addition of 100 $\mu$ L of wine .....                                                                                                                 | 17 |
| 3.6  | Addition of 125 $\mu$ L of wine .....                                                                                                                 | 18 |
| 4    | ECD measurement .....                                                                                                                                 | 19 |
| 4.1  | CD spectrum of complex ( <i>R</i> )-1b .....                                                                                                          | 19 |
| 5    | Determination of the enantiomeric excess of ( <i>R</i> )-7 .....                                                                                      | 20 |
| 5.1  | Procedure for the enantiomeric excess determination of 1-(5-bromopyridin-2-yl)ethan-1-amine (7)<br>22                                                 |    |
| 6    | Determination of the enantiomeric excess of zinc complex ( <i>R</i> )-1b.....                                                                         | 23 |
| 6.1  | General procedure for the enantiomeric excess determination of the complex.....                                                                       | 25 |
| 7    | Stereochemical considerations on the possible cages present in solution .....                                                                         | 26 |
| 8    | Addition of D-tar to Wine@( <i>R,R</i> )-2b .....                                                                                                     | 27 |
| 9    | NMR characterization.....                                                                                                                             | 30 |
| 9.1  | 1-(5-bromopyridin-2-yl)ethan-1-ol (4) .....                                                                                                           | 30 |
| 9.2  | 1-(5-bromopyridin-2-yl)ethyl 4-methylbenzenesulfonate (5) .....                                                                                       | 31 |
| 9.3  | 2-(1-azidoethyl)-5-bromopyridine (6) .....                                                                                                            | 32 |
| 9.4  | 1-(5-bromopyridin-2-yl)ethan-1-amine (7) .....                                                                                                        | 33 |
| 9.5  | <i>R</i> -(+)-1-(5-bromopyridin-2-yl)- <i>N,N</i> -bis((5-bromopyridin-2-yl)methyl)ethan-1-amine (( <i>R</i> )-8) .....                               | 34 |
| 9.6  | ( <i>R</i> )-4,4'-((((1-(5-(4-formylphenyl)pyridin-2-yl)ethyl)azanediyl) bis(methylene)) bis(pyridine-6,3-diyl))dibenzaldehyde (( <i>R</i> )-9) ..... | 35 |
| 9.7  | Complex ( <i>R</i> )-1b .....                                                                                                                         | 36 |
| 9.8  | L-Tar@2a .....                                                                                                                                        | 38 |
| 9.9  | L-Mal@2a .....                                                                                                                                        | 39 |
| 9.10 | Suc@2a.....                                                                                                                                           | 40 |
| 9.11 | Cit@2a.....                                                                                                                                           | 40 |
| 9.12 | L-Tar@( <i>R,R</i> )-2b .....                                                                                                                         | 41 |
| 9.13 | D-Tar@( <i>R,R</i> )-2b.....                                                                                                                          | 42 |
| 9.14 | L-Mal@( <i>R,R</i> )-2b .....                                                                                                                         | 43 |
| 9.15 | D-Mal@( <i>R,R</i> )-2b.....                                                                                                                          | 44 |
| 9.16 | Suc@( <i>R,R</i> )-2b.....                                                                                                                            | 44 |
| 9.17 | Prosecco@2a .....                                                                                                                                     | 45 |
| 9.18 | Chianti@2a.....                                                                                                                                       | 45 |
| 9.19 | Chardonnay@2a .....                                                                                                                                   | 46 |
| 9.20 | Valpolicella@2a .....                                                                                                                                 | 46 |
| 9.21 | Müller-Thurgau@2a.....                                                                                                                                | 47 |

|      |                                                                        |    |
|------|------------------------------------------------------------------------|----|
| 9.22 | Barbera@2a .....                                                       | 47 |
| 9.23 | Grapes Juice Squeezed@2a .....                                         | 48 |
| 9.24 | Blueberry Alcenera@2a .....                                            | 48 |
| 9.25 | Blueberry Zuegg@2a .....                                               | 49 |
| 9.26 | Blueberry Juice Squeezed@2a .....                                      | 49 |
| 9.27 | Apple Juice@2a .....                                                   | 50 |
| 9.28 | Apple Juice Squeezed@2a .....                                          | 50 |
| 9.29 | Pear Juice@2a .....                                                    | 51 |
| 9.30 | Blueberry-Grape Juice@2a .....                                         | 51 |
| 9.31 | Peach Juice@2a .....                                                   | 52 |
| 9.32 | Prosecco@(R,R)-2b .....                                                | 53 |
| 9.33 | Chianti@(R,R)-2b .....                                                 | 53 |
| 9.34 | Chardonnay@(R,R)-2b .....                                              | 54 |
| 9.35 | Valpolicella@(R,R)-2b .....                                            | 54 |
| 9.36 | Müller-Thurgau@(R,R)-2b .....                                          | 55 |
| 9.37 | Barbera@(R,R)-2b .....                                                 | 55 |
| 9.38 | Blueberry Juice Alcenera@(R,R)-2b .....                                | 56 |
| 9.39 | Blueberry Juice Zuegg@(R,R)-2b .....                                   | 56 |
| 9.40 | Blueberry Juice Squeezed@(R,R)-2b .....                                | 57 |
| 9.41 | Apple Juice@(R,R)-2b .....                                             | 57 |
| 9.42 | Apple Squeezed@(R,R)-2b .....                                          | 58 |
| 9.43 | Pear Juice@(R,R)-2b .....                                              | 58 |
| 10   | Quantification of Dicarboxylic acids Content in Complex mixtures ..... | 59 |
| 11   | Chromatographic Analysis .....                                         | 60 |
| 12   | ESI-MS Characterization .....                                          | 65 |
| 12.1 | ESI-MS spectrum of 4 .....                                             | 65 |
| 12.2 | ESI-MS spectrum of 5 .....                                             | 66 |
| 12.3 | ESI-MS spectrum of 6 .....                                             | 67 |
| 12.4 | ESI-MS spectrum of 7 .....                                             | 68 |
| 12.5 | ESI-MS spectrum of (R)-8 .....                                         | 69 |
| 12.6 | ESI-MS spectrum of (R)-9 .....                                         | 70 |
| 12.7 | ESI-MS spectrum of (R)-1b .....                                        | 71 |
| 12.8 | ESI-MS spectrum of L-Tar@(R,R)-2b .....                                | 72 |
| 13   | References .....                                                       | 73 |



## 1 General Methods

NMR spectra were recorded at 301 K on Bruker Avance-300 MHz, Bruker 400 Avance III BBI-z grad 5 mm Bruker 600 Avance Neo spectrometer. All the  $^1\text{H}$ -NMR spectra were referenced to residual isotopic impurity of  $\text{CDCl}_3$  (7.26 ppm),  $\text{DMSO-}d_6$  (2.50 ppm) or  $\text{CD}_3\text{CN}$  (1.98 ppm).  $^{13}\text{C}$ -NMR spectra were referenced to the  $\text{CDCl}_3$  peak (77.0 ppm) or  $\text{CD}_3\text{CN}$  peak (1.32 ppm).

The following abbreviations are used in reporting the multiplicity for NMR resonances; s=single, d=doublet, t= triplet, and m=multiplet. The NMR data were processed using Bruker Topspin 3.5 pl2 and MestReNova 12.0.0.

ESI-MS spectra have been acquired with an Agilent Technology LC/MSD Trap SL, interfaced to an Agilent 1100 binary pump. MS peak intensity for each analysis is reported as monoisotopic mass.

High resolution electrospray ionization mass spectrometry HRMS (ESI-TOF) analyses were performed in positive mode with Waters Xevo G2-S QTof. The analysis was performed with Fast Flow Injection: 10  $\mu\text{l}$  of sample injected ACN at 30  $\mu\text{l}/\text{min}$ . Capillary: 3000V, Sample cone: 30V, Source temperature: 80C, Desolvation temperature: 250  $^\circ\text{C}$ .

Chemicals were purchased from Sigma Aldrich, TCI, or Apollo Scientific and used without further purification.

ECD spectra were recorded with a Jasco J-1500 spectrometer and processed with OriginPro 2018 (64-bit) SR1 b9.5.1.195.

HPLC analysis were performed on a Shimadzu HPLC equipped with a Eurospher II 100-5 C18 (5  $\mu\text{m}$ , 4.6 x 250 mm) column. The water, used for both solvent and diluent, was HPLC-grade. For buffering the mobile phase and adjusting the pH to 2.4, both monobasic potassium phosphate and phosphoric acid were used.

## 2 Synthesis and Characterization

### 2.1 Synthesis of 1-(5-bromopyridin-2-yl)ethan-1-ol (4)

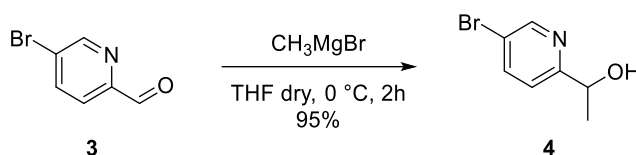

In a 250 mL double necked flask, 5-bromo-2-pyridinecarboxaldehyde **3** (10.00 g, 53.7 mmol) was dissolved in dry THF (180 mL) under  $\text{N}_2$  and cooled to  $0\text{ }^\circ\text{C}$ . Methylmagnesium bromide (1.4 M in toluene/THF (3:1), 45.9 mL, 64.2 mmol) was added dropwise under stirring. After 2 hours, the reaction mixture was diluted with EtOAc, washed with potassium phosphate buffer (1 M, pH 7), dried over  $\text{MgSO}_4$  and the solvent was removed under reduced pressure. The crude product **4** was obtained as a brownish oil and used in the next step without further purifications (10.26 g, 50.8 mmol, 95%).

$^1\text{H}$  NMR (300 MHz,  $\text{CDCl}_3$ )  $\delta$  (ppm): 8.59 (d,  $J = 2.0$  Hz, 1H), 7.80 (dd,  $J = 8.4, 2.3$  Hz, 1H), 7.24 (d,  $J = 8.4$  Hz, 1H), 4.86 (q,  $J = 6.4$  Hz, 1H), 3.73 (s, 1H), 1.48 (d,  $J = 6.5$  Hz, 2H).

ESI-MS (m/z):  $[\text{M}+\text{H}]^+$  calcd. for  $[\text{C}_7\text{H}_8\text{BrNO}+\text{H}]^+$ , 202.00, found 201.93

### 2.2 Synthesis of 1-(5-bromopyridin-2-yl)ethyl 4-methylbenzenesulfonate (5)

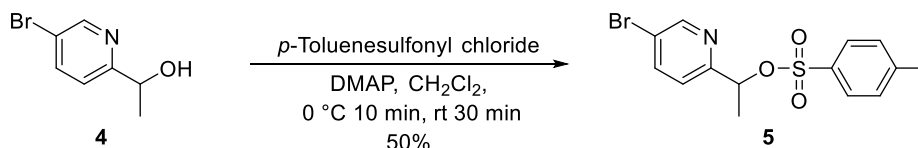

In a 250 mL flask, to a stirred solution of alcohol **4** (9.17 g, 45.4 mmol) and DMAP (11.09 g, 90.8 mmol) in  $\text{CH}_2\text{Cl}_2$  (180 mL) *p*-toluenesulfonyl chloride (10.33 g, 54.2 mmol) was added at  $0\text{ }^\circ\text{C}$ . The mixture was stirred for 10 min at the same temperature and then overnight at room temperature. After 12 hours, ice water was added to the reaction mixture and the mixture was extracted with  $\text{CH}_2\text{Cl}_2$ . The organic layer was washed with water and brine, dried over  $\text{MgSO}_4$  and the solvent was removed under reduced pressure. The brownish oil was dissolved in  $\text{CH}_2\text{Cl}_2$ , and few milliliters of EtOH were added. The mixture was put in the fridge and after 24 h the pure product **5** was obtained as a pale brown crystalline solid that was washed with few milliliter of ice-cooled EtOH (8.10 g, 50 %).

$^1\text{H}$  NMR (300 MHz,  $\text{CDCl}_3$ )  $\delta$  (ppm): 8.50 (d,  $J = 2.4$  Hz, 1H), 7.72 (dd,  $J = 8.3, 6.4$  Hz, 4H), 7.29 – 7.20 (m, 4H), 5.55 (q,  $J = 6.6$  Hz, 1H), 2.41 (s, 4H), 1.56 (d,  $J = 6.6, 3\text{H}$ ).

$^{13}\text{C}$  NMR (75 MHz,  $\text{CDCl}_3$ )  $\delta$  (ppm): 157.35, 150.21, 144.94, 139.53, 133.95, 129.87, 127.99, 122.12, 120.21, 80.13, 21.76.

FT-IR (KBr)  $\nu$  ( $\text{cm}^{-1}$ ): 2980, 2925, 1601, 1470, 1373, 1180, 1013.

ESI-MS (m/z):  $[\text{M}+\text{H}]^+$  calcd. for  $[\text{C}_{14}\text{H}_{14}\text{BrNO}_3\text{S}+\text{H}]^+$ , 356.00 ; found 356.01.

### 2.3 Synthesis of 2-(1-azidoethyl)-5-bromopyridine (6)

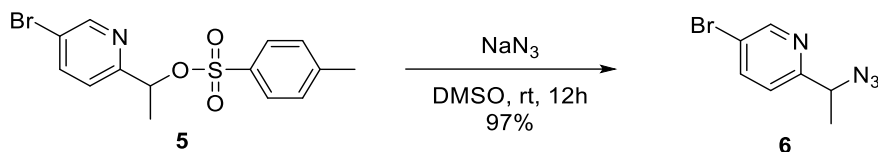

In a 250 mL flask, a mixture of tosylate **5** (6.95 g, 19.5 mmol) and sodium azide (5.07 g, 78.0 mmol) was stirred in DMSO (100 mL) at room temperature overnight. After the reaction was complete the mixture was diluted with 150 mL of 30% EtOAc in hexane and washed with water and brine. The organic layer was dried over  $\text{MgSO}_4$  and the solvent was removed under reduced pressure. The pure product **6** was obtained as a yellow oil (4.28 g, 97%).

$^1\text{H}$  NMR (300 MHz,  $\text{CDCl}_3$ )  $\delta$  (ppm): 8.62 (d,  $J = 2.4$  Hz, 1H), 7.82 (dd,  $J = 8.3, 2.4$  Hz, 1H), 7.32 – 7.14 (m, 1H), 4.62 (q,  $J = 6.9$  Hz, 1H), 1.57 (d,  $J = 6.9$  Hz, 3H).

$^{13}\text{C}$  NMR (75 MHz,  $\text{CDCl}_3$ )  $\delta$  (ppm): 158.81, 150.62, 139.77, 122.06, 119.95, 61.10, 20.15.

FT-IR ( $\text{CH}_2\text{Cl}_2$ )  $\nu$  ( $\text{cm}^{-1}$ ): 2985, 2923, 2094, 1578, 1463.

ESI-MS ( $m/z$ ):  $[\text{M}+\text{H}]^+$  calcd. for  $[\text{C}_7\text{H}_7\text{BrN}_4+\text{H}]^+$ , 227.00, found 226.94.

### 2.4 Synthesis of 1-(5-bromopyridin-2-yl)ethan-1-amine (7)

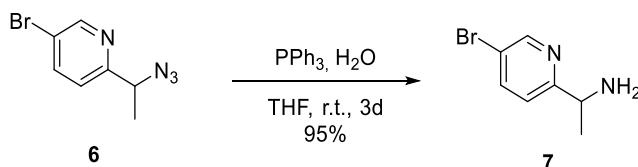

In a 500 mL flask, a mixture of azide **6** (4.28g, 18.8 mmol), triphenylphosphine (9.89 g, 37.7 mmol), and water (0.68 mL, 37.7 mmol), was stirred in THF at room temperature for 48 hours. After that, water (0.68 mL, 37.7 mmol) was added and the reaction mixture was stirred for 24 hours. The mixture was condensed under reduced pressure and the residual brown oil was distilled using a K $\ddot{u}$ gelrohr apparatus, yielding the pure product **7** as a pale yellow oil (3.6 g, 95%) (bp 130  $^\circ\text{C}$ /0.1 mm Hg).

$^1\text{H}$  NMR (300 MHz,  $\text{CDCl}_3$ )  $\delta$  (ppm): 8.59 (d,  $J = 2.4$  Hz, 1H), 7.76 (dd,  $J = 8.2, 2.3$  Hz, 1H), 7.23 (d,  $J = 8.4$  Hz, 1H), 4.13 (q,  $J = 6.7$  Hz, 1H), 1.88 (s, 3H), 1.40 (d,  $J = 6.6$  Hz, 3H).

$^{13}\text{C}$  NMR (75 MHz,  $\text{CDCl}_3$ )  $\delta$  (ppm): 164.41, 150.31, 139.28, 121.65, 118.70, 52.18, 24.53.

FT-IR ( $\text{CH}_2\text{Cl}_2$ )  $\nu$  ( $\text{cm}^{-1}$ ): 3350, 3591, 2976, 2931, 1587, 1463, 1365.

ESI-MS ( $m/z$ ):  $[\text{M}+\text{H}]^+$  calcd. for  $[\text{C}_7\text{H}_9\text{BrN}_2+\text{H}]^+$ , 201.00, found 200.95

## 2.5 Synthesis of *R*-(+)-1-(5-bromopyridin-2-yl)ethan-1-amine ((*R*)-7)

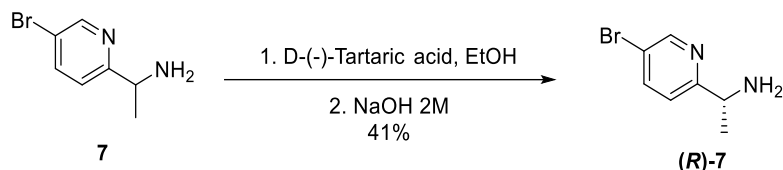

In a Schlenk apparatus, racemic 1-(5-bromopyridin-2-yl)ethan-1-amine **7** (4.10 g, 12.6 mmol) and D-(-)-tartaric acid (3.50 g, 23.3 mmol) were dissolved in 2 mL of boiling water. Then 10 mL of boiling EtOH were added to the mixture. The solution was cooled to room temperature. After 24 hours, a white crystalline precipitate was observed. The supernatant was removed and the crystals washed with few milliliters of EtOH and Et<sub>2</sub>O. Four recrystallizations of this precipitate from 8 mL of 95% EtOH gave the (-)-acid tartrate salt of *R*-(+)-amine (>99% e.e.). The salt was dissolved in 50 mL of 2 M NaOH and the solution was extracted with Et<sub>2</sub>O. The organic layer was dried with MgSO<sub>4</sub> and concentrated under reduced pressure. The pure product (*R*)-**7** was obtained as a pale yellow oil (0.85 g, 41%). The enantiomeric excess of (*R*)-**7** has been reported via NMR using a reported procedure.<sup>1</sup>

$$[\alpha]_D^{25} = +13.7^\circ \text{ (c 0.02 g/mL, CH}_2\text{Cl}_2\text{)}$$

## 2.6 Synthesis of *R*-(+)-1-(5-bromopyridin-2-yl)-*N,N*-bis((5-bromopyridin-2-yl)methyl)ethan-1-amine ((*R*)-8)

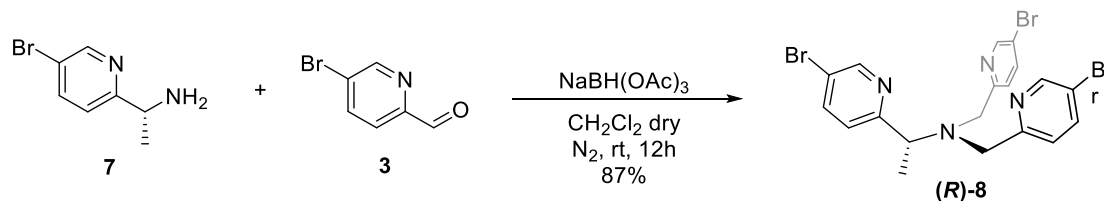

In a Schlenk apparatus, (*R*)-**7** (0.40 g, 2.2 mmol) and 5-bromo-2-pyridinecarboxaldehyde **3** (0.41 g, 2.2 mol) were dissolved in 15 mL of dry CH<sub>2</sub>Cl<sub>2</sub> under N<sub>2</sub>, and left under stirring for 1 hour. Three aliquots of NaBH(OAc)<sub>3</sub> (0.15 g, 0.73 mmol) were added waiting 20 minutes between each addition. After that, 5-bromo-2-pyridinecarboxaldehyde **3** (0.41 g, 2.2 mol) was added and the mixture was left under stirring for 1 hour. Three aliquots of NaBH(OAc)<sub>3</sub> (0.15 g, 0.73 mmol) were added waiting 20 minutes between each addition. After the reaction mixture was stirred for 12 hours at room temperature. The solvent was removed under reduced pressure. The resulting brown oil was dissolved in EtOAc and the solution extracted with 0.1 M solution of KOH (3x25 mL). The organic phases were dried with MgSO<sub>4</sub> and the solvent was removed under reduced pressure. The crude product was chromatographed on neutral alumina (CH<sub>2</sub>Cl<sub>2</sub>/EtOAc = 9.5 : 0.5). The pure product (*R*)-**8** was collected as a yellow oil (0.94 g, 87%).

$$[\alpha]_D^{25} = +121.1^\circ \text{ (c 0.02 g/mL, CH}_2\text{Cl}_2\text{)}$$

<sup>1</sup>H NMR (600 MHz, CDCl<sub>3</sub>) δ (ppm): δ 8.65 (d, *J* = 2.4 Hz, 1H), 8.59 (d, *J* = 2.3 Hz, 2H), 7.80 (dd, *J* = 8.3, 2.4 Hz, 1H), 7.77 (dd, *J* = 8.3, 2.4 Hz, 2H), 4.02 (q, *J* = 6.8 Hz, 1H), 3.93 (d, *J* = 15.0 Hz, 2H), 3.72 (d, *J* = 15.0 Hz, 2H), 1.53 (d, *J* = 6.8 Hz, 3H).



$^{13}\text{C}$  NMR (75 MHz,  $\text{CDCl}_3$ )  $\delta$  (ppm): 160.45, 158.93, 150.24, 139.20, 138.96, 124.36, 119.36, 119.11, 59.96, 56.23, 14.91.

FT-IR (KBr)  $\nu$  ( $\text{cm}^{-1}$ ): 2980, 2931, 2837 1573, 1468, 1362, 1084, 1007.

ESI-MS ( $m/z$ ):  $[\text{M}+\text{H}]^+$  calcd. for  $[\text{C}_{19}\text{H}_{17}\text{Br}_3\text{N}_4+\text{H}]^+$ , 538.90; found 538.93.

## 2.7 Synthesis of (*R*)-4,4'-((((1-(5-(4-formylphenyl)pyridin-2-yl)ethyl)azanediy)bis(methylene))bis(pyridine-6,3-diyl))dibenzaldehyde ((*R*)-9)

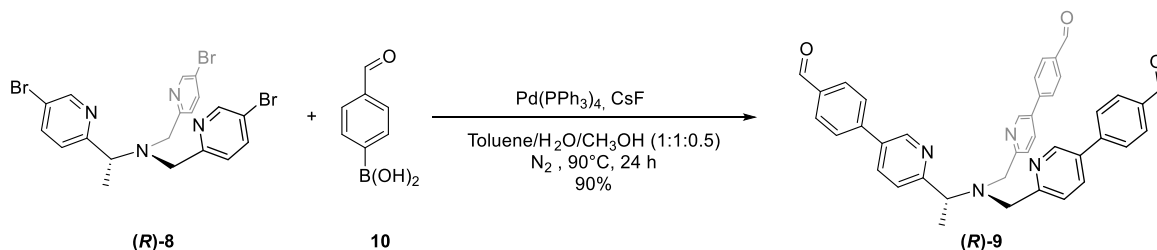

In a Schlenk apparatus, a mixture of (*R*)-8 (0.465 g, 0.9 mmol), 4-formylphenylboronic acid **10** (1.030 g, 6.9 mmol),  $\text{Pd}(\text{PPh}_3)_4$  (0.100 g, 0.086 mmol) and CsF (1.88 g, 12.3 mmol) was dissolved in 10 mL of  $\text{H}_2\text{O}$ /toluene/ $\text{CH}_3\text{OH}$  (1:1:0.5). The mixture was stirred under  $\text{N}_2$  for 24 hours at 90 °C. The solvent was removed under reduced pressure. The resulting brown oil was dissolved in  $\text{CHCl}_3$  and the solution washed with  $\text{H}_2\text{O}$ . The organic phases were dried over  $\text{MgSO}_4$ , filtered on Celite and the solvent was removed under reduced pressure. The resulting brown oil was precipitated by crystallization from THF/hexane to yield the product (*R*)-9 as pale yellow solid.

$[\alpha]_D^{25} = +95.2^\circ$  (c 0.01 g/mL,  $\text{CH}_2\text{Cl}_2$ )

$^1\text{H}$  NMR (600 MHz,  $\text{CDCl}_3$ )  $\delta$  (ppm): 10.12-10.10 (m, 3H), 8.92 (d,  $J = 2.4$  Hz, 1H), 8.83 (d,  $J = 2.3$  Hz, 2H), 8.03-7.99 (m, 6H), 7.96 (dd,  $J = 8.1, 2.4$  Hz, 1H), 7.93 (dd,  $J = 8.1, 2.4$  Hz, 2H), 7.81 – 7.72 (m, 8H), 7.70 (d,  $J = 8.1$  Hz, 1H), 4.26 (q,  $J = 6.8$  Hz, 1H), 4.16 (d,  $J = 15.1$  Hz, 2H), 3.96 (d,  $J = 15.1$  Hz, 2H), 1.70 (d,  $J = 6.8$  Hz, 3H).

$^{13}\text{C}$  NMR (75 MHz,  $\text{CDCl}_3$ )  $\delta$  (ppm): 191.71, 161.97, 160.53, 147.60, 143.75, 135.81, 135.16, 134.92, 133.68, 130.54, 127.65, 123.08, 60.48, 56.71, 15.17.

FT-IR (KBr)  $\nu$  ( $\text{cm}^{-1}$ ): 2977, 2934, 2827, 1701, 1600, 1211, 1172, 821.

ESI-MS ( $m/z$ ):  $[\text{M}+\text{H}]^+$  calcd. for  $[\text{C}_{40}\text{H}_{32}\text{N}_4\text{O}_3 + \text{H}]^+$ , 617.30; found 617.28.

## 2.8 Synthesis of complex (R)-1b

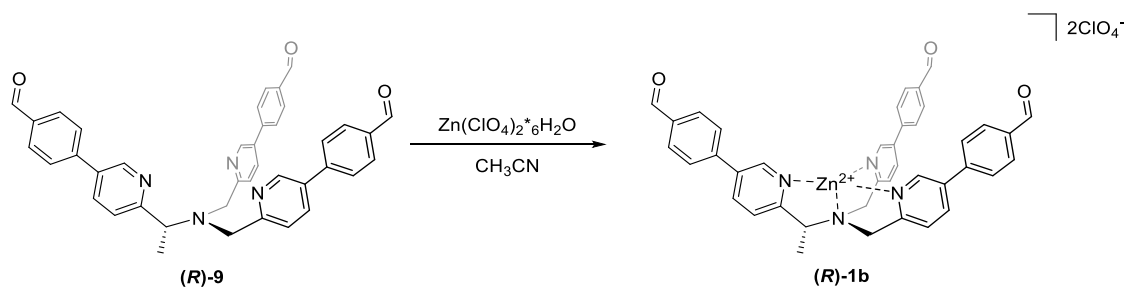

To a suspension of ligand (R)-9 (100 mg, 0.18 mmol) in  $\text{CH}_3\text{CN}$  (25 mL) zinc(II) perchlorate hexahydrate was added (67 mg, 0.18 mmol). The solution was stirred at room temperature for 1 hour and the reaction was followed by  $^1\text{H-NMR}$  and ESI-MS. At the end of the reaction  $\text{Et}_2\text{O}$  (25mL) was added, obtaining quantitatively a crystalline solid then centrifugated and dried. Complex (R)-1b resulted as pale yellow solid (154 mg, 95%).

$[\alpha]_D^{25} = +181.9^\circ$  (c 0.01 g/mL,  $\text{CH}_3\text{CN}$ )

$^1\text{H NMR}$  (600 MHz,  $\text{CD}_3\text{CN}$ )  $\delta$  (ppm):  $\delta$  10.13 (m, 3H, CHO), 9.05 (d,  $J = 2.2$  Hz, 1H, PyrH), 9.03 (d,  $J = 2.1$  Hz, 1H, PyrH), 9.02 (d,  $J = 2.1$  Hz, 1H, PyrH), 8.55 (dd,  $J = 8.4, 2.2$  Hz, 1H, PyrH), 8.48 (dd,  $J = 8.3, 2.2$  Hz, 1H, PyrH), 8.46 (dd,  $J = 8.2, 2.2$  Hz, 1H, PyrH), 8.12-8.11 (m, 6H, ArH), 8.02 – 7.95 (m, 6H, ArH), 7.93 (d,  $J = 8.4$  Hz, 1H, PyrH), 7.80 (d,  $J = 8.3$  Hz, 1H, PyrH), 7.75 (d,  $J = 8.3$  Hz, 1H, PyrH), 4.71 (d,  $J = 17.1$  Hz, 1H, CH), 4.42 (d,  $J = 16.8$  Hz, 1H, CH), 4.29 (q,  $J = 6.7$  Hz, 1H, CH), 4.11 (d,  $J = 17.1$  Hz, 1H, CH), 4.05 (d,  $J = 16.8$  Hz, 1H, CH), 1.86 (d,  $J = 6.8$  Hz, 3H,  $\text{CH}_3$ ).

$^{13}\text{C NMR}$  (151 MHz,  $\text{CD}_3\text{CN}$ )  $\delta$  (ppm) 193.21, 159.00, 156.02, 155.84, 147.92, 147.81, 141.85, 141.71, 141.49, 138.05, 138.01, 137.85, 137.80, 137.77, 131.35, 129.24, 129.19, 126.41, 126.25, 125.41, 60.16, 55.41, 53.00, 12.47.

ESI-MS (m/z):  $[\text{M}+\text{Cl}]^+$  calcd. for  $[\text{C}_{40}\text{H}_{32}\text{N}_4\text{O}_3\text{Zn}+\text{Cl}]^+$ , 715.15; found 715.25.

## 2.9 Synthesis of Cages X@2a and X@(R,R)-2b.

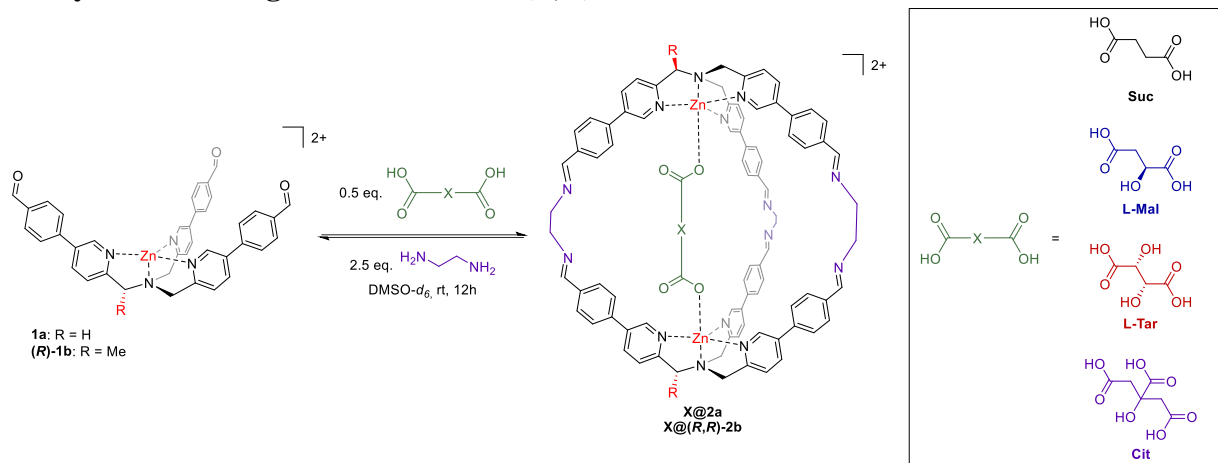

General procedure for the synthesis of molecular cages **X@2a** and **X@(R,R)-2b**. Perchlorate counterions are removed for clarity. Citric acid **Cit** has been employed as guest only in the presence of complex **1a**.

To 500  $\mu\text{l}$  (1.0  $\mu\text{mol}$ ) of a solution 0.002 M of complex **1a** or **(R)-1b** in DMSO- $d_6$ , 50  $\mu\text{l}$  (0.5  $\mu\text{mol}$ , with 2 eq. of triethylamine) of a solution 0.01 M in DMSO- $d_6$  of a dicarboxylic acid **X** and 125  $\mu\text{l}$  (2.5  $\mu\text{mol}$ ) of a solution 0.02 M in DMSO- $d_6$  of ethylenediamine were added in a NMR tube. The mixture was left for 12 hours at room temperature and checked *via*  $^1\text{H-NMR}$  and ESI-MS. The yield for all the cages is >95% (Determined *via*  $^1\text{H-NMR}$  based on internal standard *p*-xylene).

## 2.10 Synthesis of Cages in the presence of complex mixtures

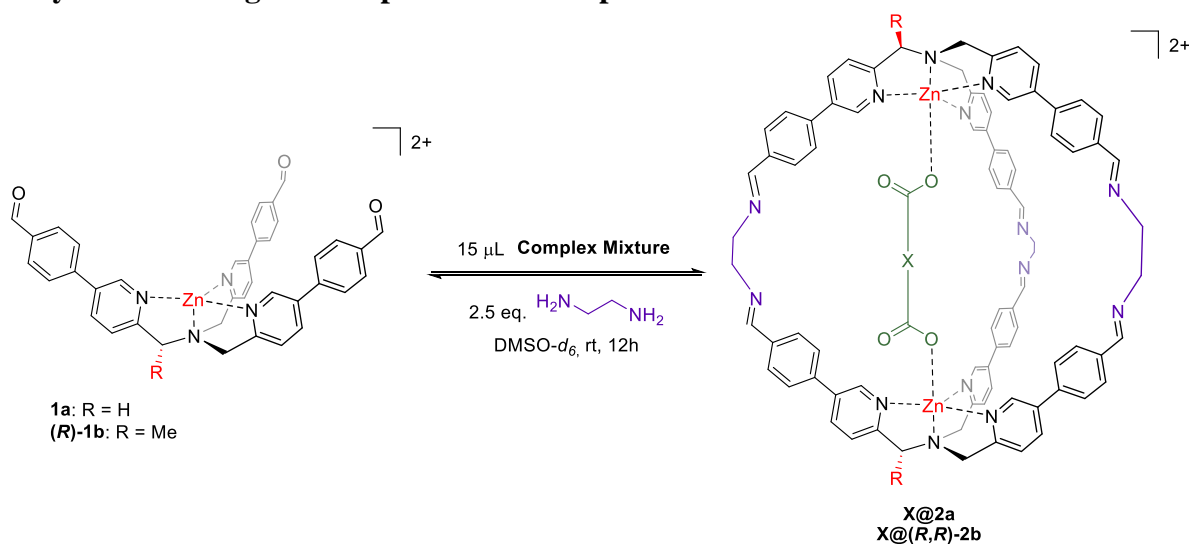

General procedure for the synthesis of molecular cages **X@2a** and **X@(R,R)-2b**. Perchlorate counterions are removed for clarity.

To 500  $\mu\text{l}$  (1.0  $\mu\text{mol}$ ) of a solution 0.002 M of complex **1a** or **(R)-1b** in DMSO- $d_6$ , 15  $\mu\text{L}$  of Complex mixture without pre-treatment and 125  $\mu\text{l}$  (2.5  $\mu\text{mol}$ ) of a solution 0.02 M in DMSO- $d_6$  of ethylenediamine were added in a NMR tube. The mixture was left for 12 hours at room temperature and checked *via*  $^1\text{H-NMR}$  and ESI-MS. The concentration of **L-Tar@2a**, **L-Mal@2a**, and **L-Suc@2a** was determined *via*  $^1\text{H-NMR}$  based on internal standard *p*-xylene, Table S1).

### 2.10.1 L-Tar@2a

<sup>1</sup>H-NMR (600 MHz, DMSO-d<sub>6</sub>) δ (ppm): 9.37 (s, 6H, PyrH), 8.23 (s, 6H, NH<sub>imm</sub>), 8.16 (d, J = 7.5 Hz, 6H, PyrH), 7.85 (d, J = 7.8 Hz, 12H, ArH), 7.70 (d, J = 7.4 Hz, 12H, ArH), 7.50 – 7.48 (m, 6H, PyrH), 4.98 (d, J = 4.8 Hz, 2H, OH<sub>TAR</sub>), 4.83 (d, J = 4.8 Hz, 2H, CH<sub>TAR</sub>), 4.48 – 4.38 (m, 12H, CH<sub>2-TPMA</sub>), 3.98 – 3.85 (m, 12H, CH<sub>2-EDA</sub>).

HRMS (ESI-TOF) (*m/z*): [M<sup>2+</sup>] calcd. for [C<sub>88</sub>H<sub>76</sub>N<sub>14</sub>O<sub>6</sub>Zn<sub>2</sub>]<sup>2+</sup>, 776.2322 ; found 776.2319.

### 2.10.2 L-Mal@2a

<sup>1</sup>H-NMR (600 MHz, DMSO-d<sub>6</sub>) δ (ppm): 9.39 – 9.30 (m, 6H, PyrH), 8.28 – 8.26 (m, 6H, NH<sub>imm</sub>), 8.18 – 8.13 (m, 6H, PyrH), 7.85 (d, J = 7.8 Hz, 12H, ArH), 7.66 – 7.63 (m, 12H, ArH), 7.53 – 7.49 (m, 6H, PyrH), 4.92 – 4.90 (m, 2H, OH<sub>MAL</sub> – CH<sub>MAL</sub>), 4.46 – 4.43 (m, 12H, CH<sub>2-TPMA</sub>), 3.95 – 3.91 (m, 12H, CH<sub>2-EDA</sub>), 2.84 – 2.79 (m, 2H, CH<sub>2-MAL</sub>).

HRMS (ESI-TOF) (*m/z*): [M<sup>2+</sup>] calcd. for [C<sub>88</sub>H<sub>76</sub>N<sub>14</sub>O<sub>5</sub>Zn<sub>2</sub>]<sup>2+</sup>, 768.2347; found 768.2348.

### 2.10.3 Suc@2a

<sup>1</sup>H-NMR (600 MHz, DMSO-d<sub>6</sub>) δ (ppm): 9.34 (s, 6H, PyrH), 8.29 (s, 6H, NH<sub>imm</sub>), 8.16 (d, J = 8.1 Hz, 6H, PyrH), 7.85 (d, J = 8.4 Hz, 12H, ArH), 7.64 (d, 12H, J = 8.3 Hz, ArH), 7.51 (d, 6H, J = 8.2 Hz, PyrH), 4.45 (s, 12H, CH<sub>2-TPMA</sub>), 3.96 (s, 12H, CH<sub>2-EDA</sub>), 2.87 (s, 4H, CH<sub>2-SUC</sub>).

HRMS (ESI-TOF) (*m/z*): [M<sup>2+</sup>] calcd. for [C<sub>88</sub>H<sub>76</sub>N<sub>14</sub>O<sub>4</sub>Zn<sub>2</sub>]<sup>2+</sup>, 760.2373; found 760.2349.

### 2.10.4 Cit@2a

<sup>1</sup>H-NMR (600 MHz, DMSO-d<sub>6</sub>) δ (ppm): 9.50 – 9.34 (m, 6H, PyrH), 8.31 – 8.23 (m, 12H, NH<sub>imm</sub>+ PyrH), 7.82 – 7.71 (m, 26H, ArH+PyrH), 7.51 (s, 4H, PyrH), 4.46 (s, 12H, CH<sub>2-TPMA</sub>), 4.01 – 3.82 (m, 12H, CH<sub>2-EDA</sub>), (CH<sub>2-CIT</sub>, 4H, hidden by solvent).

HRMS (ESI-TOF) (*m/z*): [M<sup>2+</sup>] calcd. for [C<sub>90</sub>H<sub>78</sub>N<sub>14</sub>O<sub>7</sub>Zn<sub>2</sub>]<sup>2+</sup>, 797.2374; found 797.2391.

### 2.10.5 L-Tar@(*R,R*)-2b

<sup>1</sup>H NMR (600 MHz, DMSO-*d*<sub>6</sub>) δ 9.59 – 9.17 (m, 6H, PyrH), 8.35 (d, *J* = 8.3 Hz, 2H, PyrH), 8.31 – 8.16 (m, 8H, NH<sub>imm</sub>+PyrH), 8.01 – 7.99 (m, 4H, ArH+PyrH), 7.88 – 7.53 (m, 26H, ArH+PyrH), 7.09 (d, *J* = 8.2 Hz, 2H, PyrH), 5.03 (d, *J* = 4.6 Hz, 2H, OH<sub>TAR</sub>), 4.99 – 4.92 (m, 2H, CH<sub>TPMA</sub>), 4.90 (d, *J* = 4.6 Hz, 2H, CH<sub>TAR</sub>), 4.62 – 4.58 (m, 2H, CH<sub>2-TPMA</sub>), 4.52 – 4.47 (m, 2H, CH<sub>2-TPMA</sub>), 4.24 – 4.13 (m, 4H, CH<sub>2-TPMA</sub>), 3.96 – 3.87 (m, 4H, CH<sub>2-EDA</sub>), 3.68 – 3.64 (m, 8H, CH<sub>2-EDA</sub>), 1.84 (d, *J* = 6.6 Hz, 6H, CH<sub>3-TPMA</sub>).

HRMS (ESI-TOF) (*m/z*): [*M*<sup>2+</sup>] calcd. for [C<sub>90</sub>H<sub>80</sub>N<sub>14</sub>O<sub>6</sub>Zn<sub>2</sub>]<sup>2+</sup>, 790.2479; found 790.2465.

### 2.10.6 D-Tar@(*R,R*)-2b

<sup>1</sup>H NMR (600 MHz, DMSO-*d*<sub>6</sub>) δ 9.67 – 9.24 (m, 6H, PyrH), 8.29 – 8.19 (m, 12H, NH<sub>imm</sub>+PyrH), 8.03 – 8.00 (m, 6H, NH<sub>imm</sub>+PyrH), 7.85 – 7.80 (m, 8H, ArH+PyrH), 7.77 – 7.73 (m, 4H, ArH+PyrH), 7.64 – 7.54 (m, 10H, ArH+PyrH), 7.15 (d, *J* = 8.3 Hz, 2H), 4.94 – 4.92 (m, 4H, CH<sub>TPMA</sub>+OH<sub>TAR</sub>), 4.69 (d, *J* = 6.0 Hz, 2H, CH<sub>TAR</sub>), 4.94 – 4.92 (m, 4H, CH<sub>2-TPMA</sub>), 4.13 – 3.82 (m, 16H, CH<sub>2-TPMA</sub>+CH<sub>2-EDA</sub>), 1.85 (d, *J* = 6.8 Hz, 6H, CH<sub>3-TPMA</sub>).

HRMS (ESI-TOF) (*m/z*): [*M*<sup>2+</sup>] calcd. for [C<sub>90</sub>H<sub>80</sub>N<sub>14</sub>O<sub>5</sub>Zn<sub>2</sub>]<sup>2+</sup>, 790.2479; found 790.2465.

### 2.10.7 L-Mal@(*R,R*)-2b

<sup>1</sup>H NMR (600 MHz, DMSO-*d*<sub>6</sub>) δ 9.72 – 9.11 (m, 6H, PyrH), 8.39 – 8.12 (m, 9H, NH<sub>imm</sub>+PyrH), 8.07 – 7.96 (m, 5H, PyrH), 7.89 – 7.56 (m, 26H, ArH+PyrH), 7.20 – 7.12 (m, 2H, PyrH), 4.97 – 4.86 (m, 6H, CH<sub>MAL</sub>+OH<sub>MAL</sub>+CH<sub>-TPMA</sub>), 4.56 – 4.52 (m, 4H, CH<sub>2-TPMA</sub>), 4.16 – 4.14 (m, 2H, CH<sub>2-TPMA</sub>), 4.03 – 3.77 (m, 12H, CH<sub>2-EDA</sub>), , 1.87 – 1.84 (m, 6H, CH<sub>3-TPMA</sub>), (CH<sub>2-MAL</sub>, 2H, hidden by solvent).

HRMS (ESI-TOF) (*m/z*): [*M*<sup>2+</sup>] calcd. for [C<sub>90</sub>H<sub>80</sub>N<sub>14</sub>O<sub>5</sub>Zn<sub>2</sub>]<sup>2+</sup>, 782.2504; found 782.2457.

### 2.10.8 D-Mal@(*R,R*)-2b

<sup>1</sup>H NMR (600 MHz, DMSO-*d*<sub>6</sub>) δ 9.73 – 9.07 (m, 6H, PyrH), 8.36 – 8.15 (m, 8H, NH<sub>imm</sub>+PyrH), 8.06 – 7.54 (m, 32H, ArH+PyrH), 7.18 – 7.12 (m, 2H, PyrH), 4.96 – 4.84 (m, 5H, CH<sub>MAL</sub>+OH<sub>MAL</sub>+CH<sub>-TPMA</sub>), 4.57 – 4.50 (m, 4H, CH<sub>2-TPMA</sub>), 4.18 – 4.16 (m, 2H, CH<sub>2-TPMA</sub>), 4.08 – 3.75 (m, 13H, CH<sub>2-TPMA</sub>+CH<sub>2-EDA</sub>), , 1.86 – 1.83 (m, 6H, CH<sub>3-TPMA</sub>), (CH<sub>2-MAL</sub>, 2H, hidden by solvent).

HRMS (ESI-TOF) (*m/z*): [*M*<sup>2+</sup>] calcd. for [C<sub>90</sub>H<sub>80</sub>N<sub>14</sub>O<sub>6</sub>Zn<sub>2</sub>]<sup>2+</sup>, 782.2504; found 782.2457.

### 2.10.9 Suc@(*R,R*)-2b

<sup>1</sup>H NMR (600 MHz, DMSO-*d*<sub>6</sub>) δ 9.53 – 9.15 (m, 6H, PyrH), 8.35 (s, 2H, NH<sub>imm</sub>), 8.30 – 8.28 (m, 4H, NH<sub>imm</sub>+PyrH), 8.24 (s, 2H, NH<sub>imm</sub>), 8.19 – 8.17 (m, 2H, PyrH), 8.04 – 8.02 (m, 2H, PyrH), 7.97 (d, *J* = 8.3 Hz, 4H, ArH), 7.84 – 7.71 (m, 14H, ArH+PyrH), 7.62 – 7.58 (m, 8H, ArH+PyrH), 7.57 – 7.54 (m, 2H, PyrH), 7.20 (d, *J* = 8.3 Hz, 2H, PyrHf), 4.85 – 4.82 (m, 2H, CH<sub>-TPMA</sub>), 4.53 (s, 4H, CH<sub>2-TPMA</sub>), 4.15 – 4.13 (m, 2H, CH<sub>2-</sub>

$_{\text{TPMA}}$ ), 4.06 – 3.93 (m, 10H,  $\text{CH}_2\text{-TPMA} + \text{CH}_2\text{-EDA}$ ), 3.84 – 3.83 (m, 4H,  $\text{CH}_2\text{-EDA}$ ), 2.34 (s, 4H,  $\text{CH}_2\text{-SUC}$ ), 1.85 (d,  $J = 6.7$  Hz, 6H,  $\text{CH}_3\text{-TPMA}$ ).

HRMS (ESI-TOF) ( $m/z$ ): [ $M^{2+}$ ] calcd. for  $[\text{C}_{90}\text{H}_{80}\text{N}_{14}\text{O}_4\text{Zn}_2]^{2+}$ , 774.2529; found 774.2508.

### 3 Self Assembly with different amount of Wine

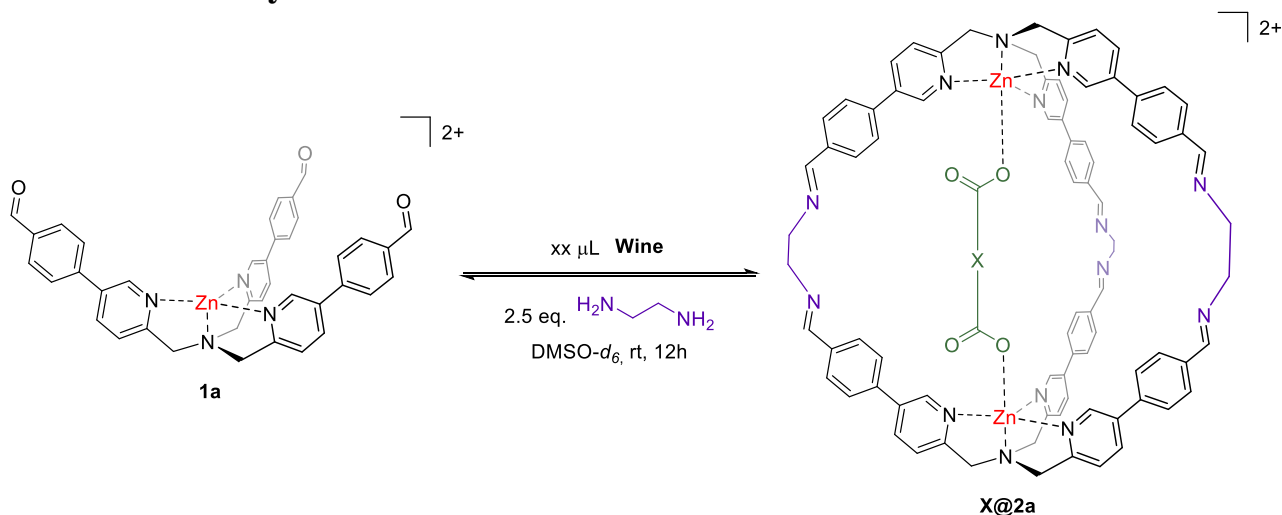

General procedure for the synthesis of molecular cage **X@2a** using different quantities of Valpolicella wine. Perchlorate counterions are removed for clarity.

To 500  $\mu\text{L}$  (1.0  $\mu\text{mol}$ ) of a solution 0.002 M of complex **1** in  $\text{DMSO-}d_6$  different amount of Valpolicella wine (15  $\mu\text{L}$ , 30  $\mu\text{L}$ , 50  $\mu\text{L}$ , 75  $\mu\text{L}$ , 100  $\mu\text{L}$ , and 125  $\mu\text{L}$ ) without pre-treatment were added (triethylamine was added to correct the acidity of wine). In order to keep the concentration constant,  $\text{DMSO-}d_6$  was added to reach the final volume of 625  $\mu\text{L}$ . Then, 125  $\mu\text{L}$  (2.5  $\mu\text{mol}$ ) of a solution 0.02 M in  $\text{DMSO-}d_6$  of ethylenediamine were added slowly under stirring. The mixture was left for 12 hours at room temperature and checked *via*  $^1\text{H-NMR}$  using p-xylene as internal standard.

#### 3.1 Addition of 15 $\mu\text{L}$ of wine

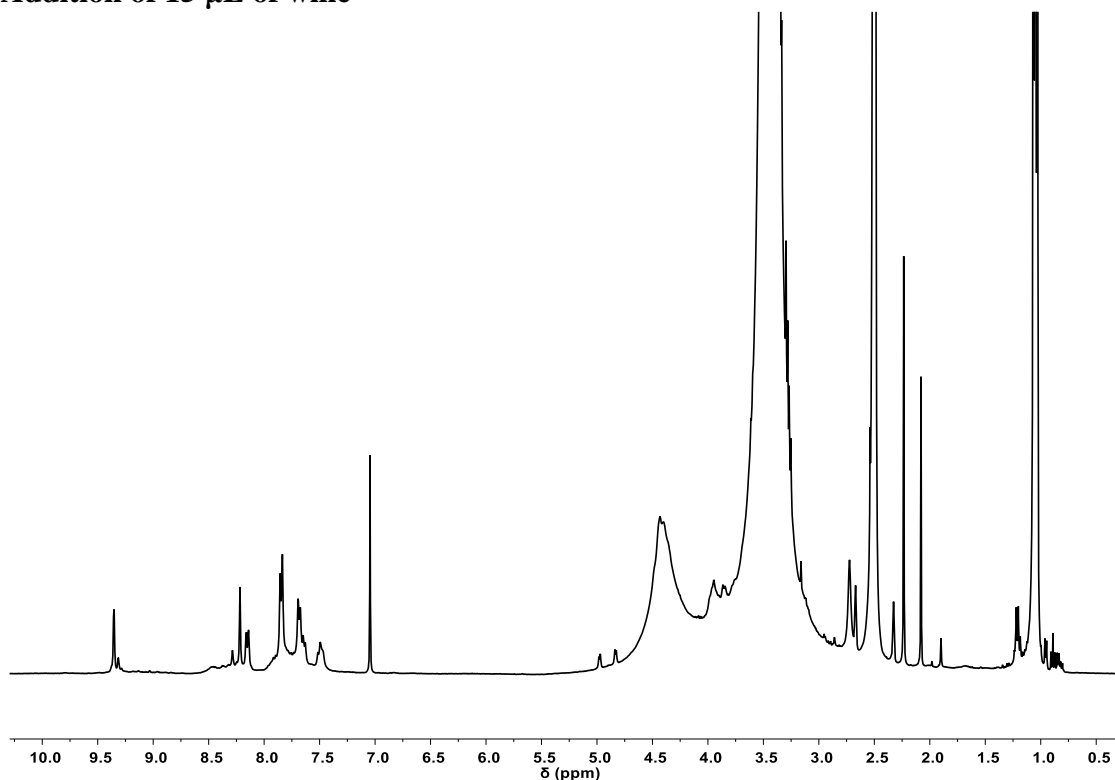

**Figure S1**  $^1\text{H-NMR}$  spectrum (400 MHz, 301 K,  $\text{DMSO-}d_6$ ) of the mixture obtained using 15  $\mu\text{L}$  of wine (yield 43% based on p-xylene).

### 3.2 Addition of 30 $\mu\text{L}$ of wine

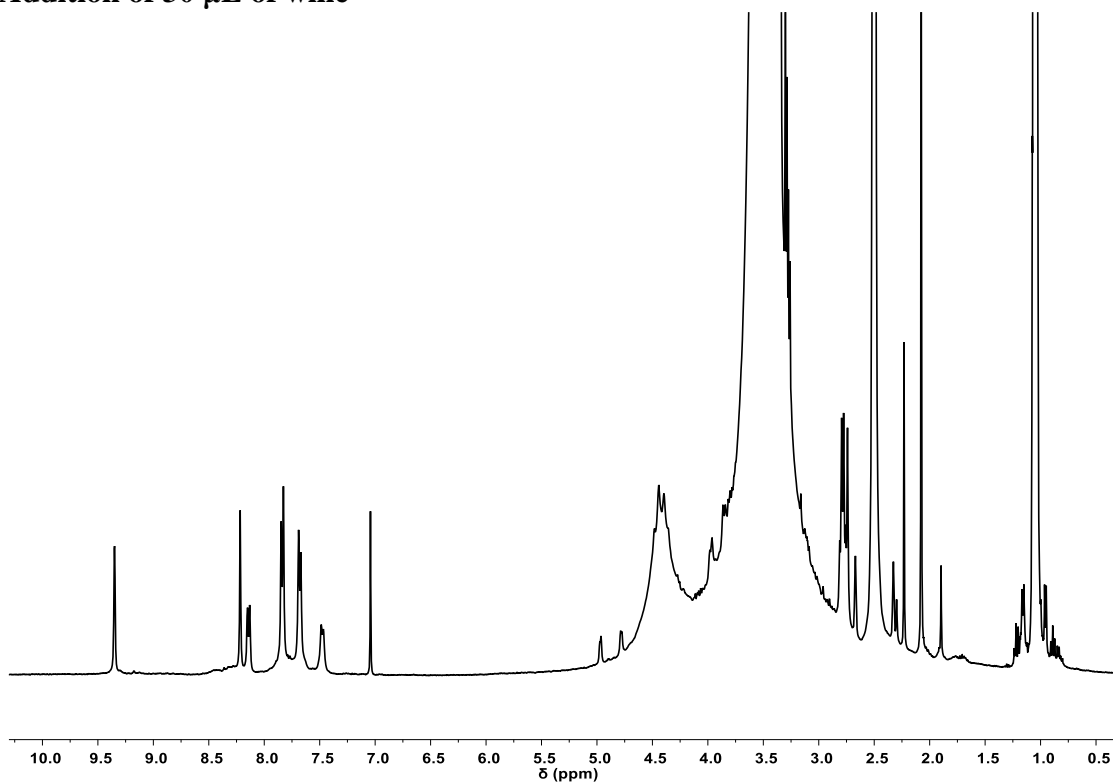

**Figure S2**  $^1\text{H-NMR}$  spectrum (400 MHz, 301 K,  $\text{DMSO-}d_6$ ) of the mixture obtained using 30  $\mu\text{L}$  of wine (yield 94% based on p-xylene).

### 3.3 Addition of 50 $\mu\text{L}$ of wine

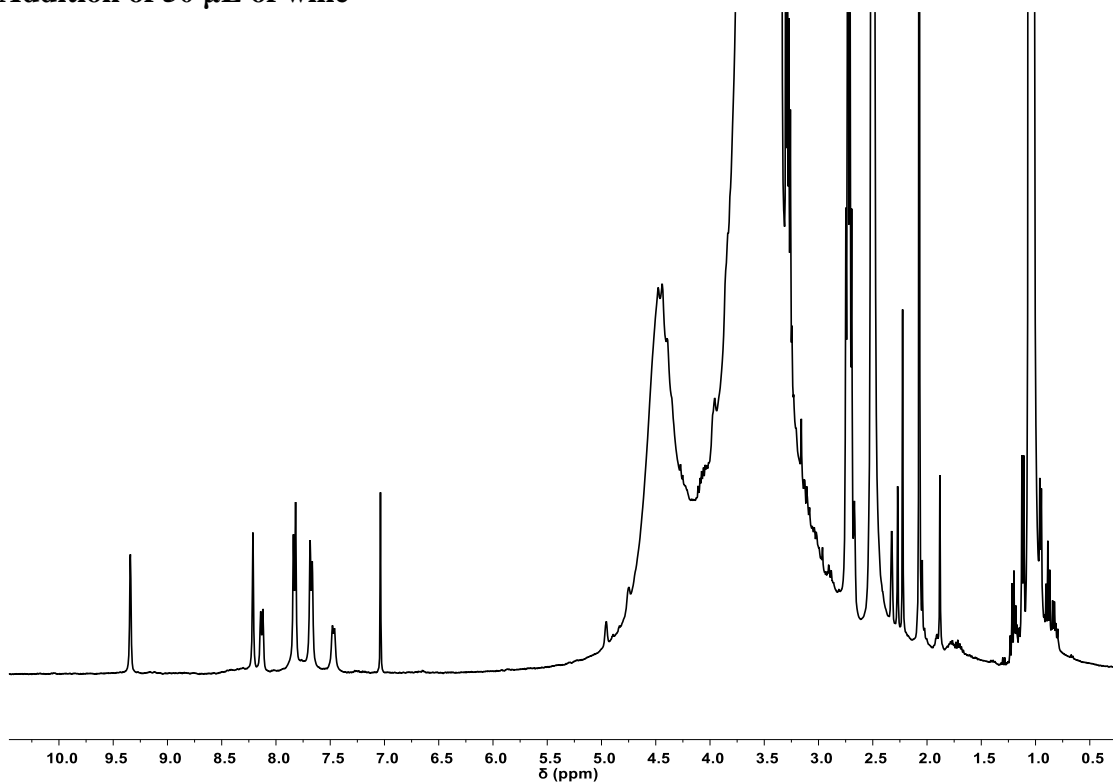

**Figure S3**  $^1\text{H-NMR}$  spectrum (400 MHz, 301 K,  $\text{DMSO-}d_6$ ) of the mixture obtained using 50  $\mu\text{L}$  of wine (yield 72% based on p-xylene).



### 3.4 Addition of 75 $\mu\text{L}$ of wine

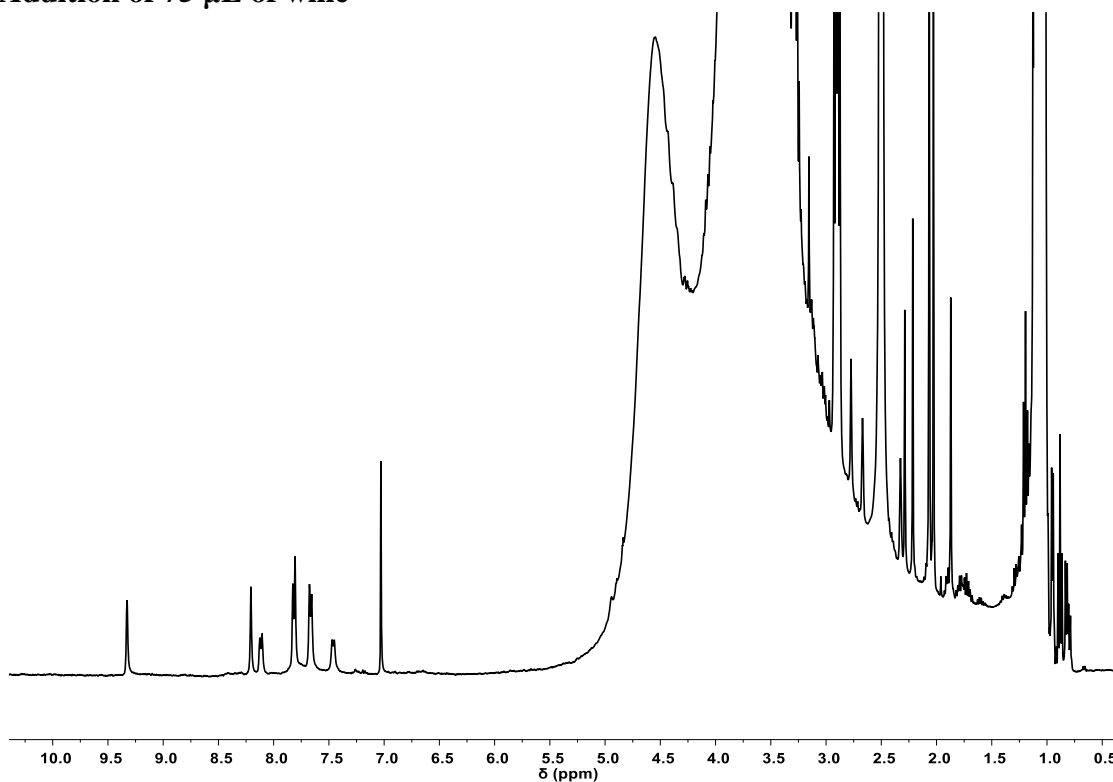

**Figure S4**  $^1\text{H-NMR}$  spectrum (400 MHz, 301 K,  $\text{DMSO-}d_6$ ) of the mixture obtained using 75  $\mu\text{L}$  of wine (yield 33% based on p-xylene).

### 3.5 Addition of 100 $\mu\text{L}$ of wine

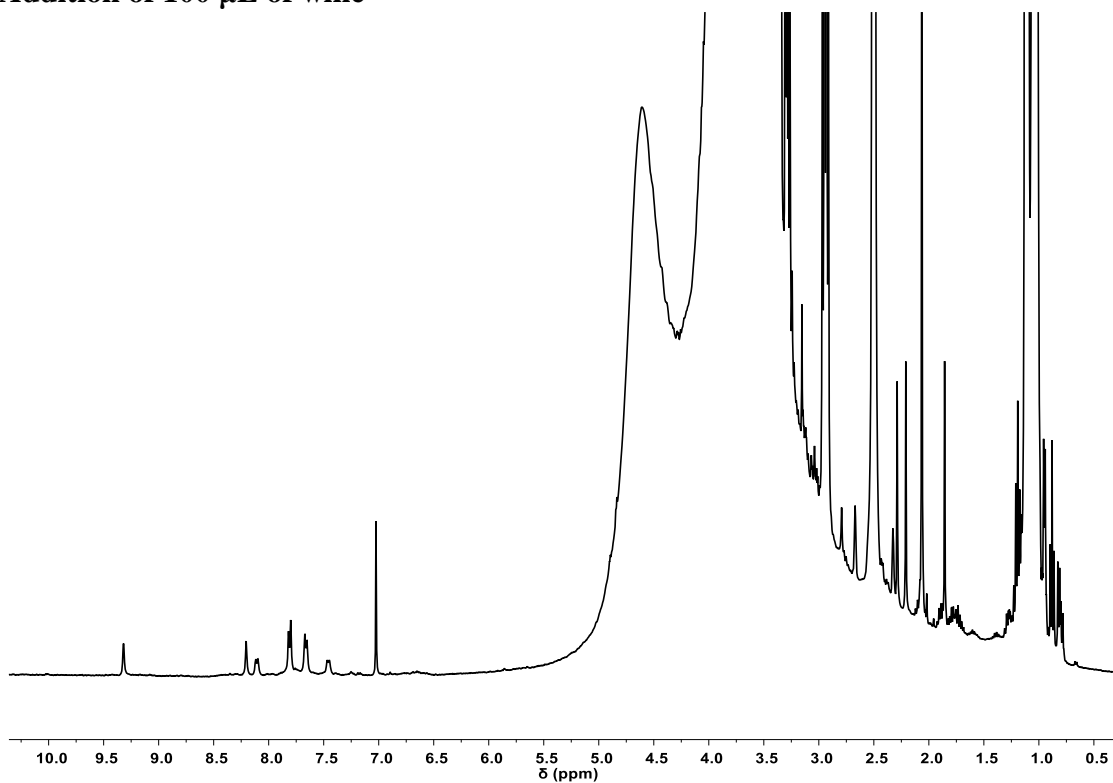

**Figure S5**  $^1\text{H-NMR}$  spectrum (400 MHz, 301 K,  $\text{DMSO-}d_6$ ) of the mixture obtained using 100  $\mu\text{L}$  of wine (yield 22% based on p-xylene)..

### 3.6 Addition of 125 $\mu\text{L}$ of wine

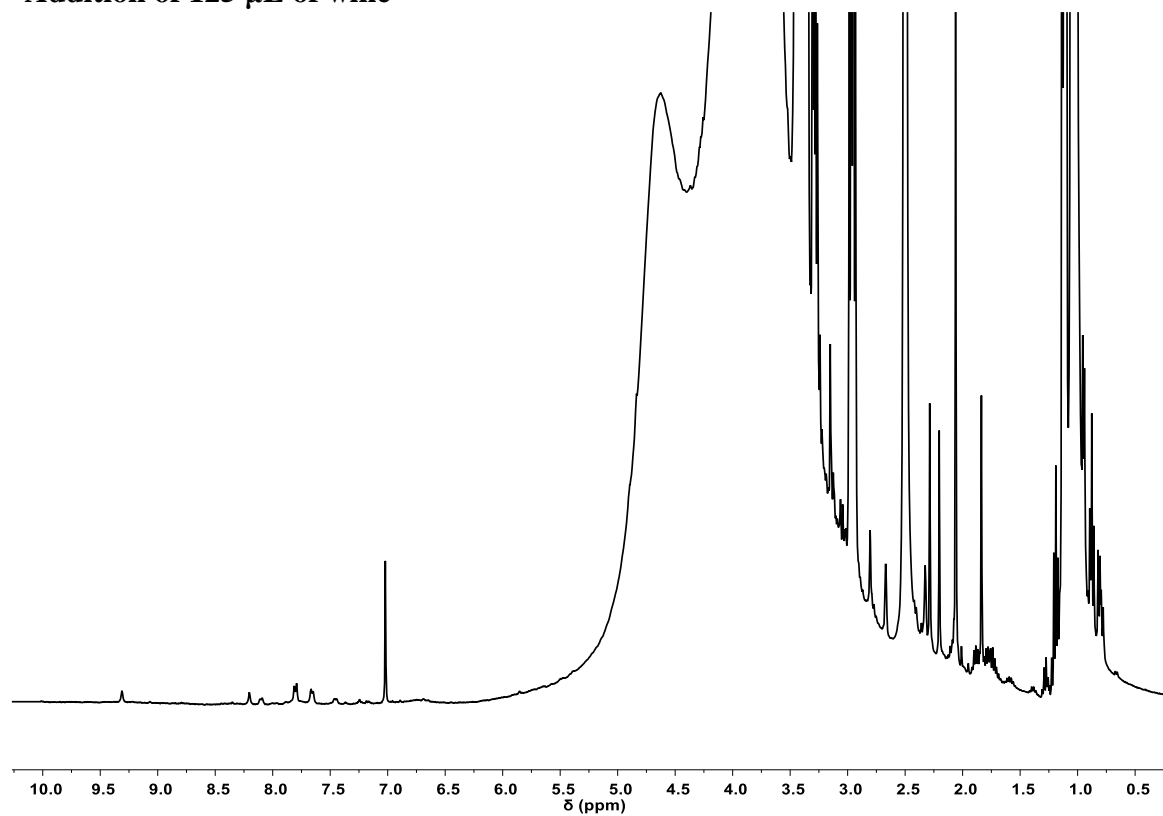

**Figure S6**  $^1\text{H}$ -NMR spectrum (400 MHz, 301 K,  $\text{DMSO-}d_6$ ) of the mixture obtained using 125  $\mu\text{L}$  of wine (yield 8% based on p-xylene)..

## 4 ECD measurement

ECD measurement was performed diluting complex (**R**)-**1b** with CH<sub>3</sub>CN to obtain a final concentration equal to 1.0·10<sup>-5</sup>M (0.1 cm cuvette). The CD spectrum was measured in millidegrees and reported in G value.

### 4.1 CD spectrum of complex (**R**)-**1b**

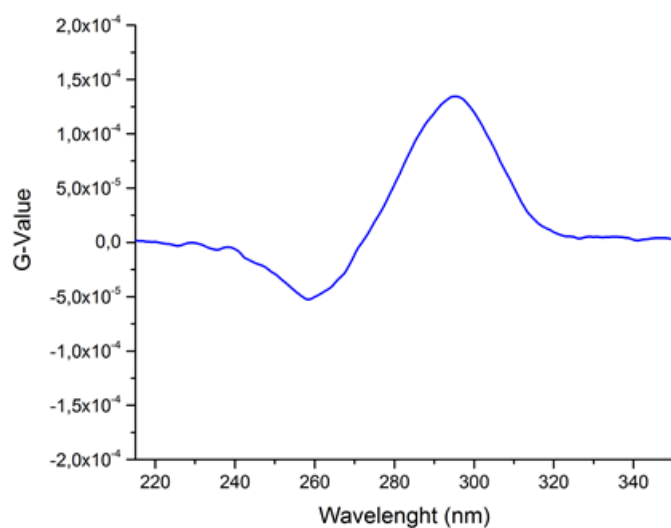

**Figure S7** ECD spectrum of complex (**R**)-**1b**.

## 5 Determination of the enantiomeric excess of (*R*)-**7**

The enantiomeric excess of the chiral amine **R-7** has been determined using a procedure reported by Bull *et al.*<sup>1</sup> To obtain the derivatization, 1.0 equiv. of boronic acid **11**, 1.1 equiv. of (*S*)-**BINOL** and 1.0 equiv. of the racemic amine **7** was dissolved in CDCl<sub>3</sub> in the presence of 4 Å molecular sieves and the <sup>1</sup>H-NMR was acquired after 5 minutes. The reaction led to the formation of rigid diastereoisomeric imino-boronate esters (*S-R*)-**7** and (*S-S*)-**7**

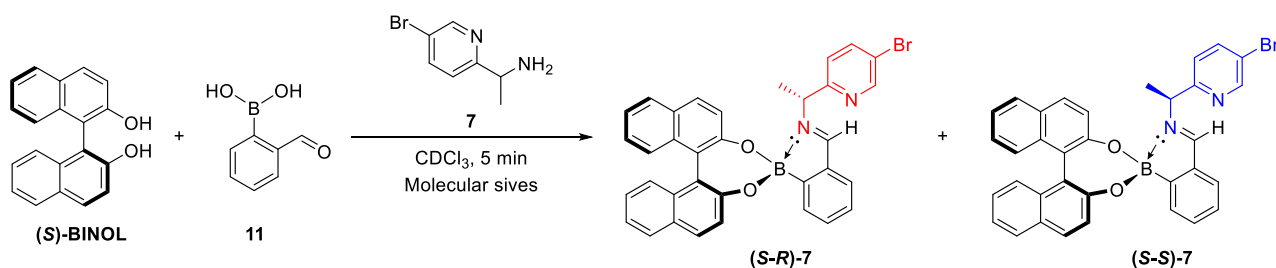

The <sup>1</sup>H-NMR spectrum of racemic **7** showed a good separation of the doublet of the methyl group, the quartet of the benzylic proton, and the imine proton due to the significantly different anisotropic effects experienced by the amine fragments in the presence of more than one aryl substituent. As expected, the racemic mixture presented the doubling of the signal in a 1:1 ratio, making this method suitable for the determination of the enantiomeric excess of the crystallized amines (Figure S8).

As shown in Figure S9, the <sup>1</sup>H-NMR of **R-27**, after four crystallizations, showed the presence of only one diastereomer in solution, with the disappearance of the signals of the second specie, indicating the complete resolution of the enantiomer. The absolute configuration of the enantiomer has been attributed from the work of Bull taking  $\alpha$ -phenylethylamine as reference.

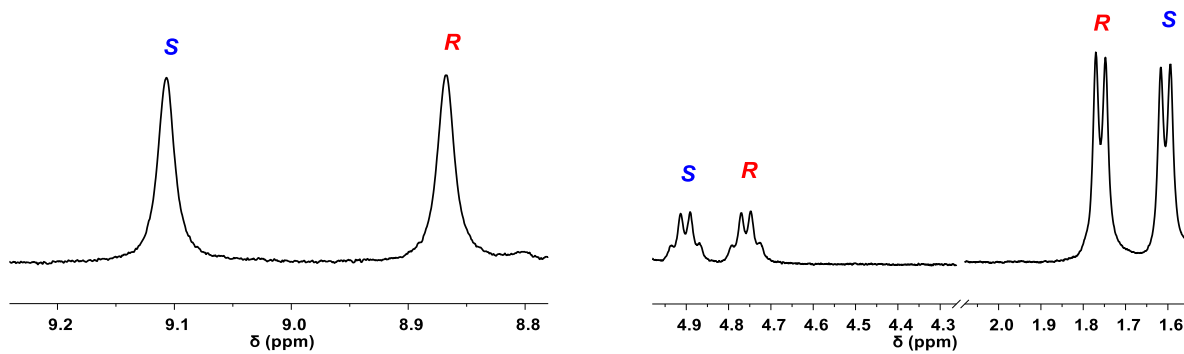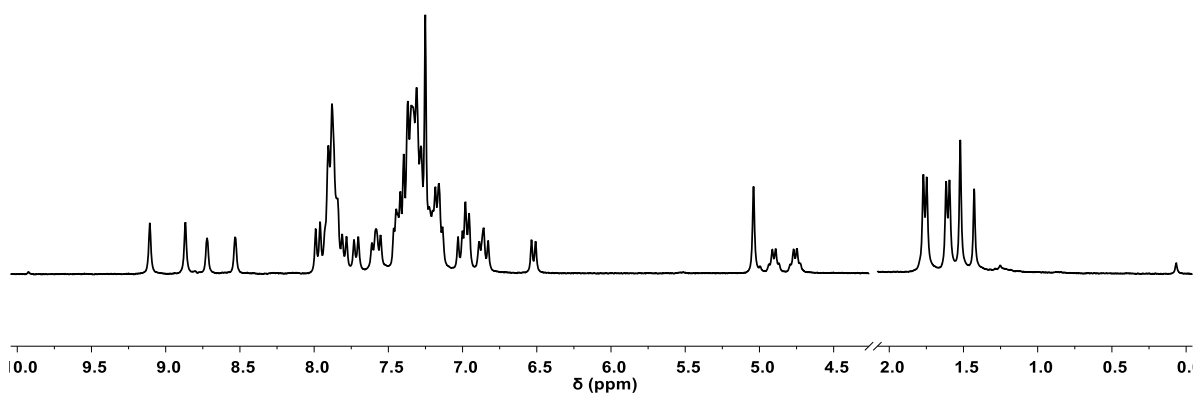

**Figure S8**  $^1\text{H-NMR}$  ( $\text{CDCl}_3$ , 300 MHz) spectrum of racemic mixture (*S-R*)-7 and (*S-S*)-7

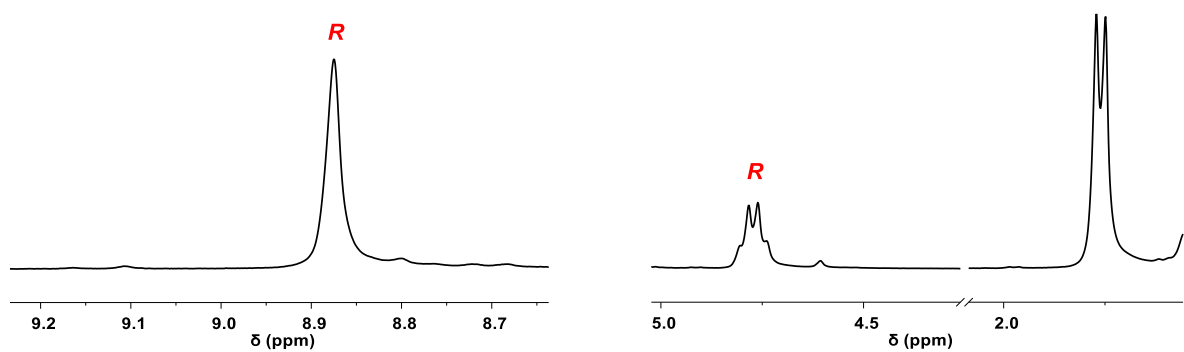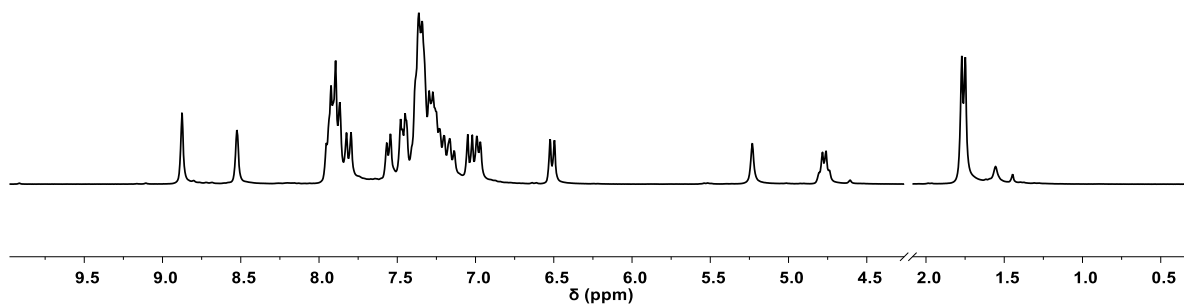

**Figure S9**  $^1\text{H-NMR}$  ( $\text{CDCl}_3$ , 300 MHz) spectrum of (*S-R*)-7

## 5.1 Procedure for the enantiomeric excess determination of 1-(5-bromopyridin-2-yl)ethan-1-amine (**7**)

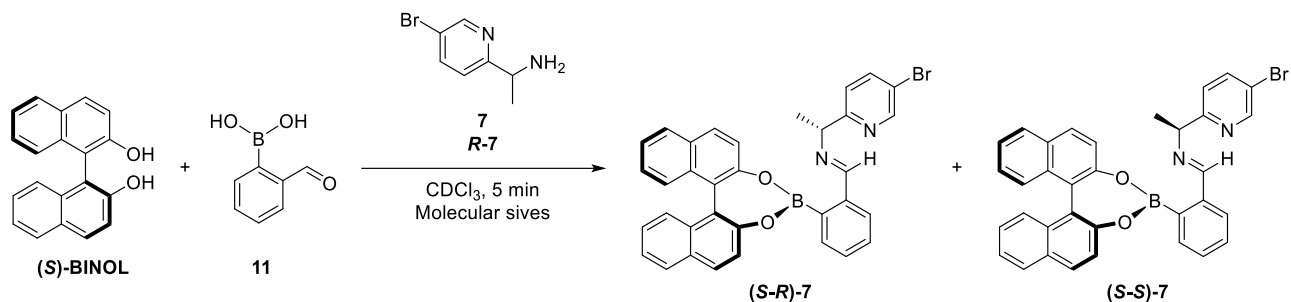

In a vial, 1.1 equiv. of (*S*)-(-)-1,1'-Bi(2-naphthol) (**S**)-**BINOL**, 1.0 equiv. of 2-formylphenylboronic acid **8** and 1.0 equiv. of 1-(5-bromopyridin-2-yl)ethan-1-amine **7** or (**R**)-**7** were dissolved in 2 mL of CDCl<sub>3</sub> in the presence of 4 Å molecular sieves. The <sup>1</sup>H-NMR spectrum of an aliquot was acquired after 5 minutes.

## 6 Determination of the enantiomeric excess of zinc complex (**R**)-1b

Since it was not possible to find a method for the quantification of enantiomeric excess of the ligand (**R**)-**9** using neither chiral chromatography nor chiral derivatization, the attention was focused on the zinc complex (**R**)-**1b**.

The capability of the zinc complex to bind chiral carboxylic acid was exploited to determine its enantiomeric excess using NMR technique.

To analyze the optical purity of the both zinc complexes (**R**)-**1b** using NMR analysis, (*S*)-(+)-2-methoxy-2-phenylacetic acid **12** was employed as CSR

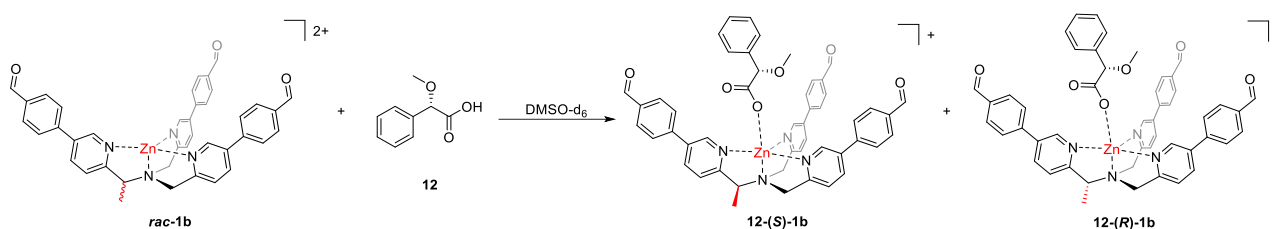

Adding chiral acid **12** to a solution of the racemic complex **rac-1b** in  $\text{DMSO-}d_6$  allowed to observe a doubling of the signals in the region of the  $\alpha$  pyridine protons between 8.90 ppm and 9.30. From the relative ratio of the areas of the signals it was possible to estimate directly the enantiomeric excess of the complex, considering the experimental error of the NMR technique. As shown in Figure S10, the racemic complex presented two doubling peaks with the same areas.

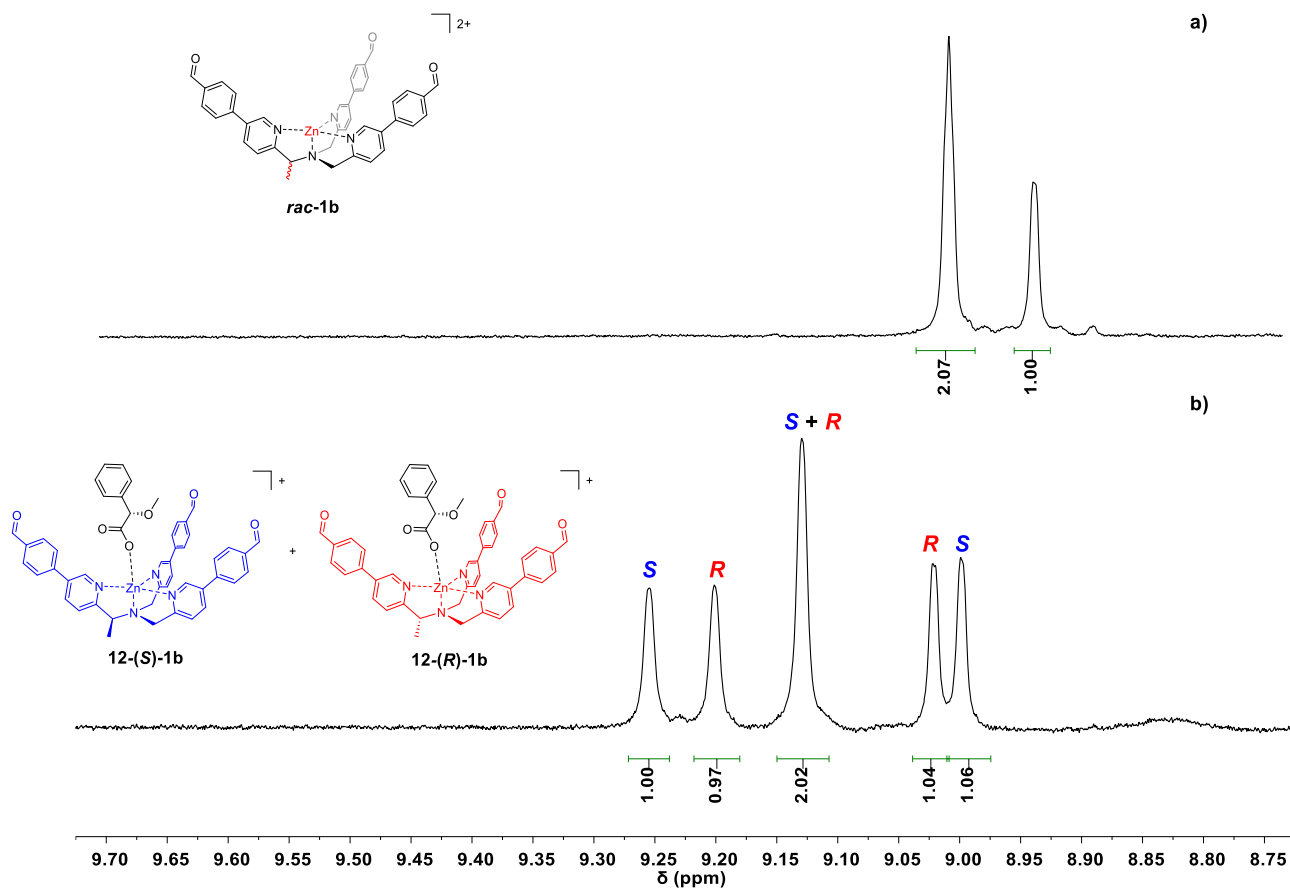

**Figure S10** <sup>1</sup>H-NMR (DMSO-*d*<sub>6</sub>, 600 MHz) spectrum of a) **rac-1b** complex, b) **rac-1b** complex after the addition of (*S*)-(+)-2-methoxy-2-phenylacetic acid **12**. From the relative ratio of the areas it was possible to estimate the enantiomeric excess.

The enantiomeric excess of zinc complex (**R**)-**1b**, has been reported in Figure S11.

From the relative ratio of the areas of the obtained signals, more than 90% of enantiomeric excess was estimated.



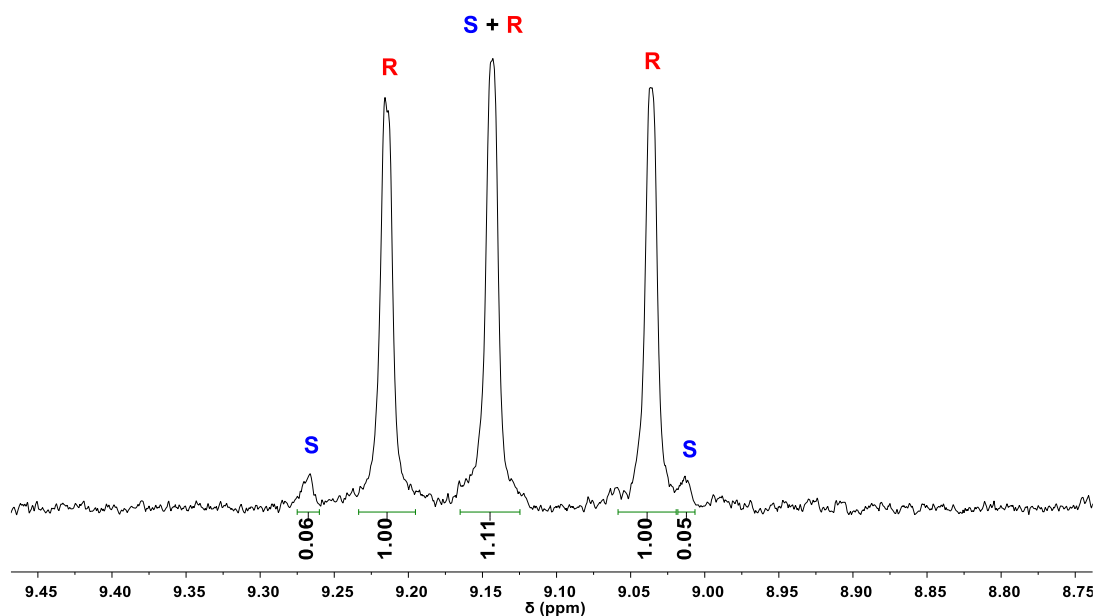

**Figure S11**  $^1\text{H-NMR}$  ( $\text{DMSO-}d_6$ , 600 MHz) spectrum (**R**)-**1b** complex after the addition of (*S*)-(+)-2-methoxy-2-phenylacetic acid **12**. From the relative ratio of the areas it was possible to estimate an enantiomeric excess of more than 90%.

### 6.1 General procedure for the enantiomeric excess determination of the complex.

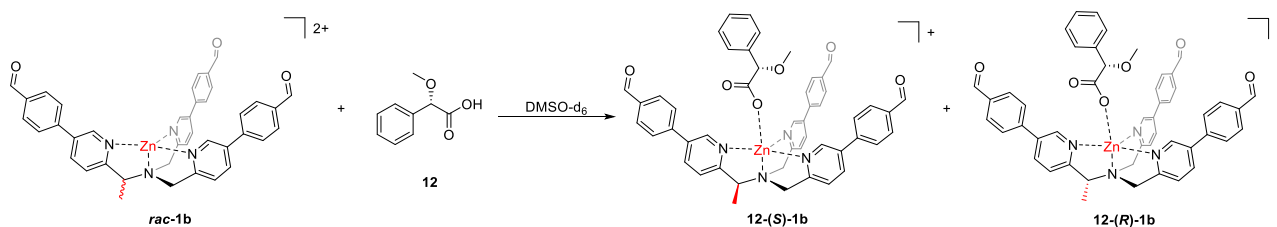

To 400  $\mu\text{L}$  (1.0  $\mu\text{mol}$ ) of a 0.002 M solution of complex (**R**)-**1b** in  $\text{DMSO-}d_6$ , 122  $\mu\text{L}$  (1.0  $\mu\text{mol}$ ) of a 0.01 M solution of (*S*)-(+)-2-methoxy-2-phenylacetic acid **12** in  $\text{DMSO-}d_6$  of were added in a NMR tube. The mixture was checked *via*  $^1\text{H-NMR}$ .

## 7 Stereochemical considerations on the possible cages present in solution

Due to presence of a stereocenter in one arm of the **TPMA** complexes, during the cage formation more than one assembly could be obtained. In particular, three different structures could be formed using **(R)-1b** complex. The resulting structures are all diastereoisomers since there is not any symmetry operation that could interconvert them to each other (Figure S12).

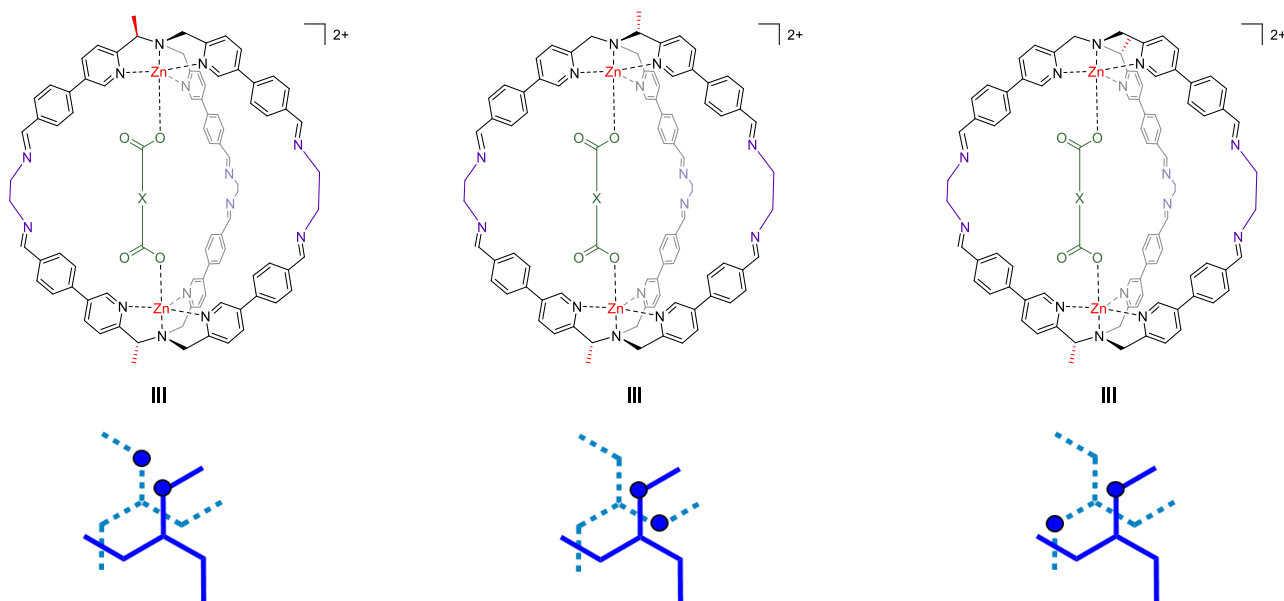

**Figure S12** Different diastereoisomers of cages  $X@(\mathbf{R},\mathbf{R})\text{-2b}$  formed in solution using enantiopure complex **(R)-1b**.

## 8 Addition of D-tar to Wine@(*R,R*)-2b

In order to test cage capability to sense unnatural enantiomers in the complex matrix, increasing amounts of unnatural **D-Tar** have been added to Valpolicella wine and used as templating agents for cage formation. After determination of L-Tartaric acid content in Valpolicella wine using  $^1\text{H-NMR}$  (2.3 g/L, Figure S49) different amount of **D-Tar** acid has been added to obtain different enantiomeric excesses. Since cage **X@(*R,R*)-2b** is chiral, **DL-Tar** (0.2 eq.) was added to a solution of complex (***R***)-**1b** and ethylenediamine in order to understand if there was no preference in binding for one of the two chiral dicarboxylic acids. As shown in Figure S13 no preference was observed.

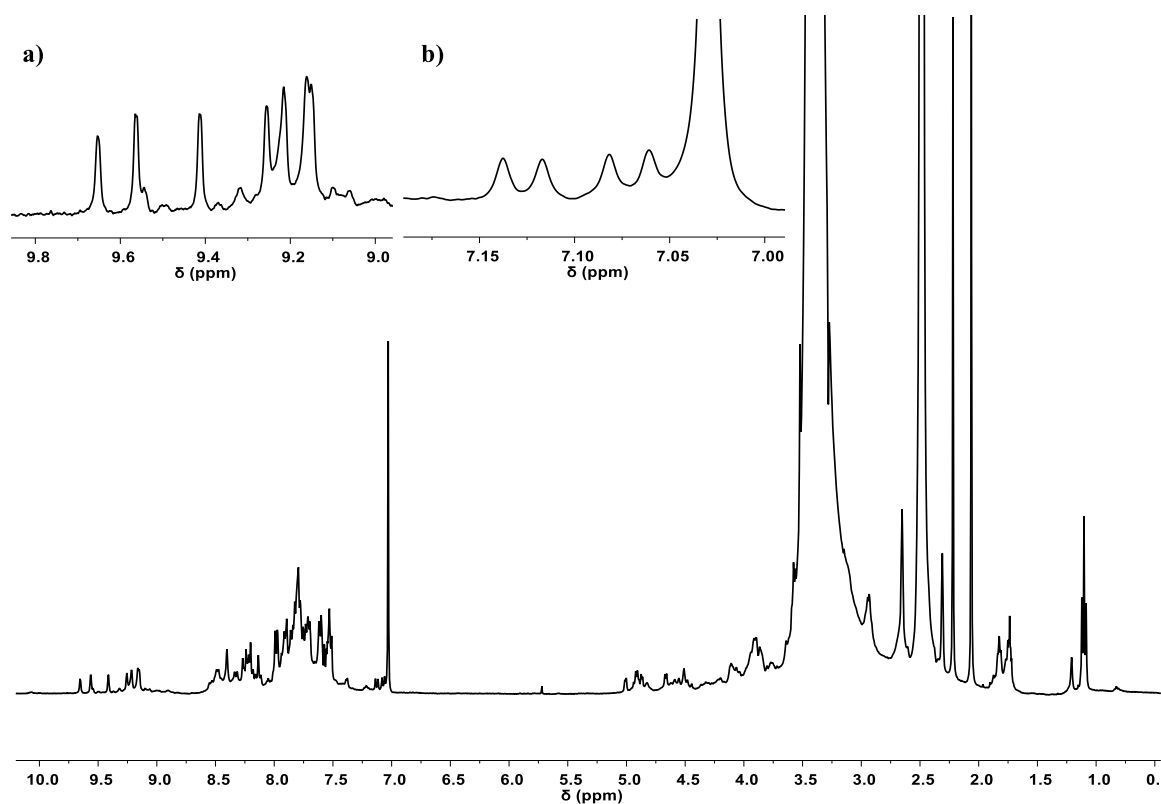

**Figure S13**  $^1\text{H-NMR}$  spectrum (600 MHz, 301 K,  $\text{DMSO-}d_6$ ) of cage **DL-Tar@(*R,R*)-2b**, a)  $\alpha$ -pyridine protons region, and b) pyridine proton region.

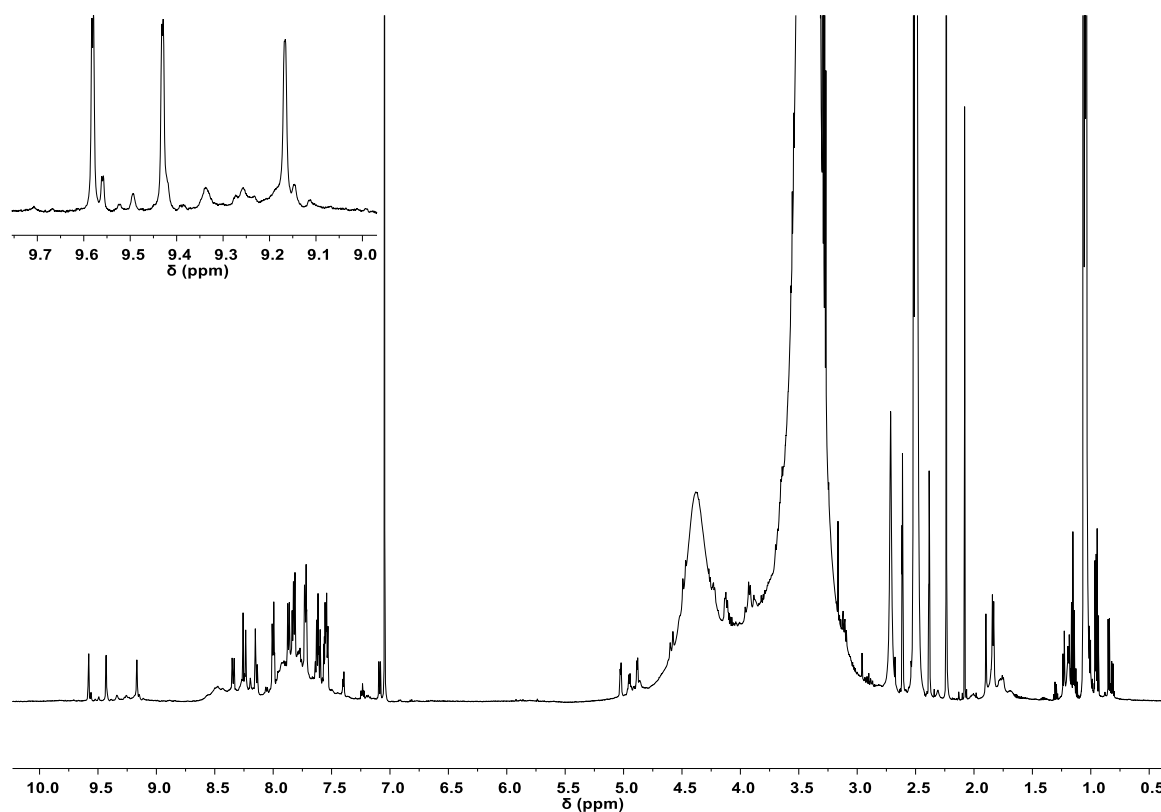

**Figure S14** <sup>1</sup>H-NMR spectrum (600 MHz, 301 K, DMSO-*d*<sub>6</sub>) of cage **Wine@(*R,R*)-2b** with **D-Tar** in order to obtain an enantiomeric excess equal to 98%.

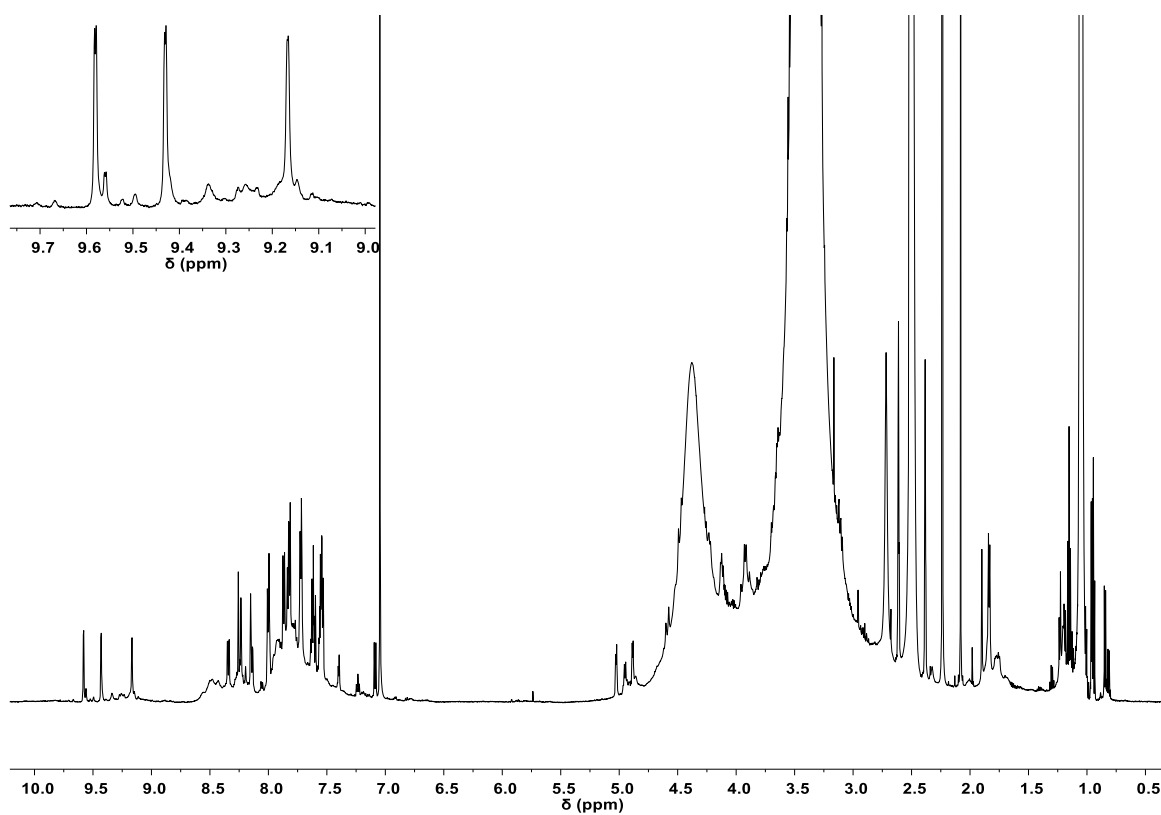

**Figure S15** <sup>1</sup>H-NMR spectrum (600 MHz, 301 K, DMSO-*d*<sub>6</sub>) of cage **Wine@(*R,R*)-2b** with **D-Tar** in order to obtain an enantiomeric excess equal to 94%.

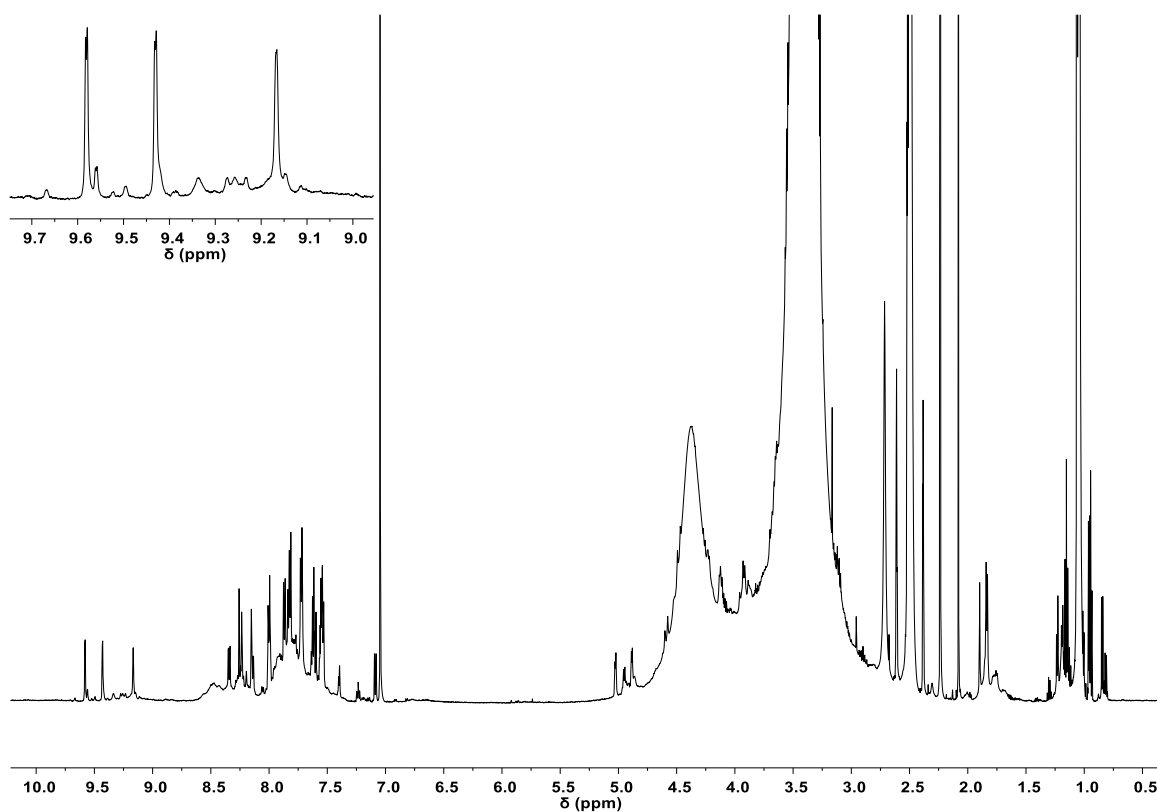

**Figure S16** <sup>1</sup>H-NMR spectrum (600 MHz, 301 K, DMSO-*d*<sub>6</sub>) of cage **Wine@(*R,R*)-2b** with **D-Tar** in order to obtain an enantiomeric excess equal to 90%.

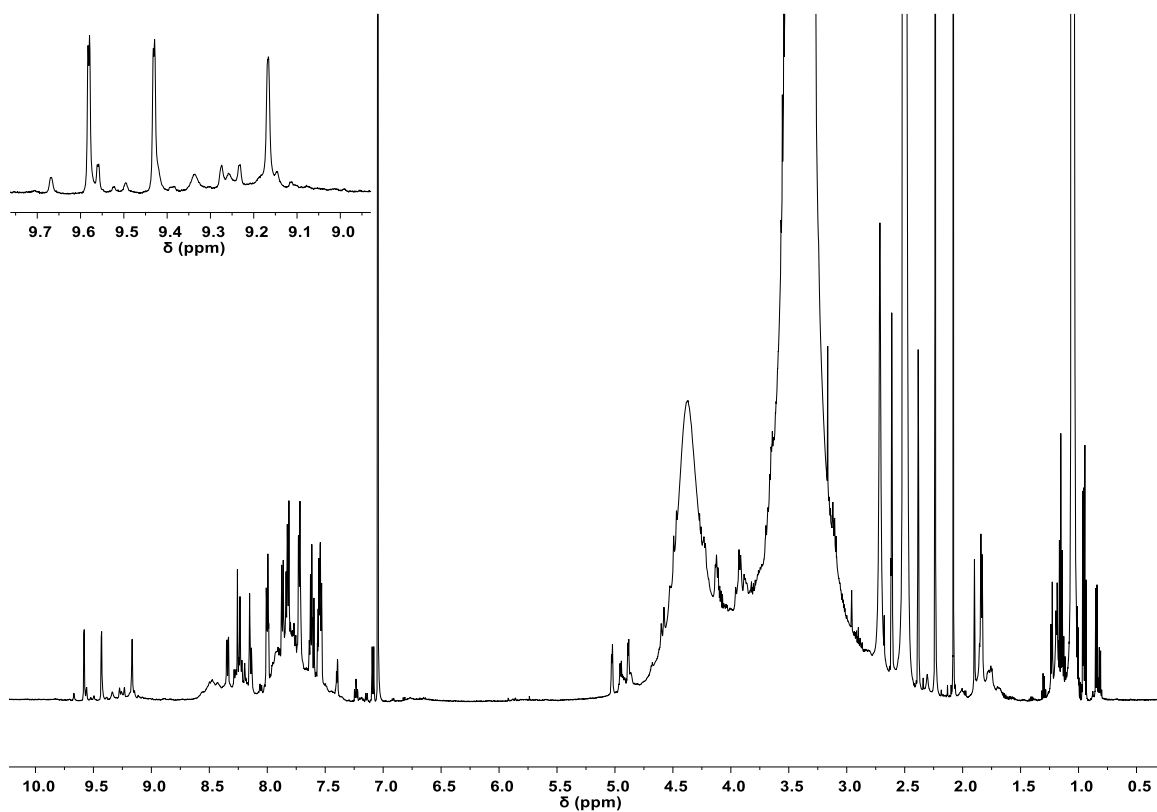

**Figure S17** <sup>1</sup>H-NMR spectrum (600 MHz, 301 K, DMSO-*d*<sub>6</sub>) of cage **Wine@(*R,R*)-2b** with **D-Tar** in order to obtain an enantiomeric excess equal to 84%.

## 9 NMR characterization

### 9.1 1-(5-bromopyridin-2-yl)ethan-1-ol (4)

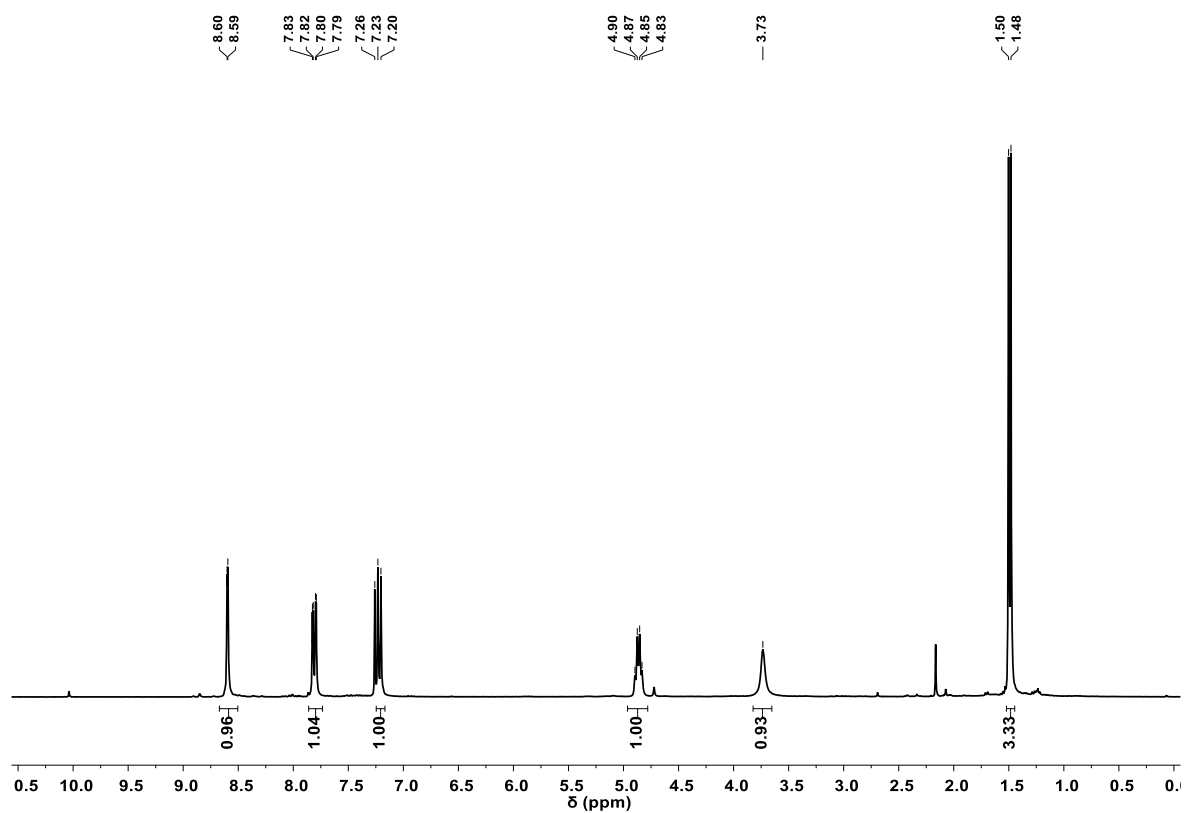

Figure S18 <sup>1</sup>H-NMR spectrum (300 MHz, 301 K, CDCl<sub>3</sub>) of 4.

## 9.2 1-(5-bromopyridin-2-yl)ethyl 4-methylbenzenesulfonate (5)

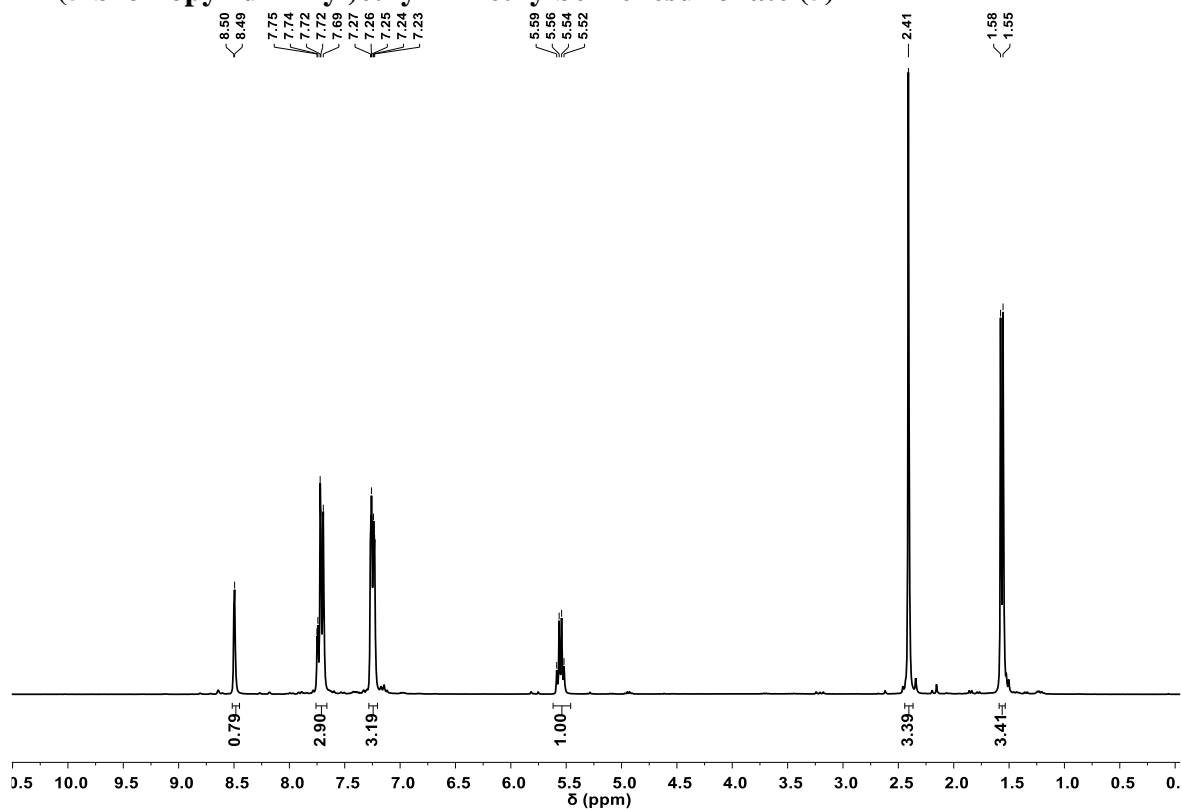

Figure S19 <sup>1</sup>H-NMR spectrum (300 MHz, 301 K, CDCl<sub>3</sub>) of 5.

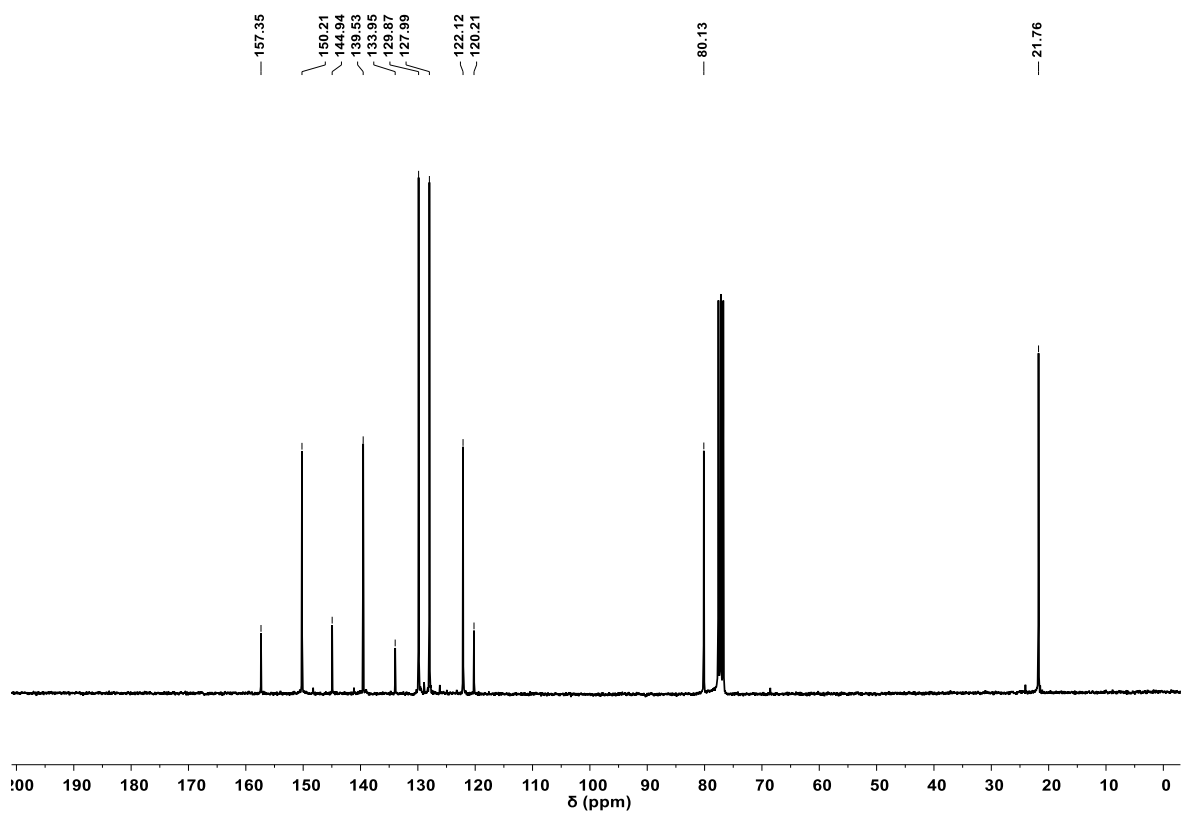

Figure S20 <sup>13</sup>C-NMR spectrum (75 MHz, 301 K, CDCl<sub>3</sub>) of 5.

### 9.3 2-(1-azidoethyl)-5-bromopyridine (6)

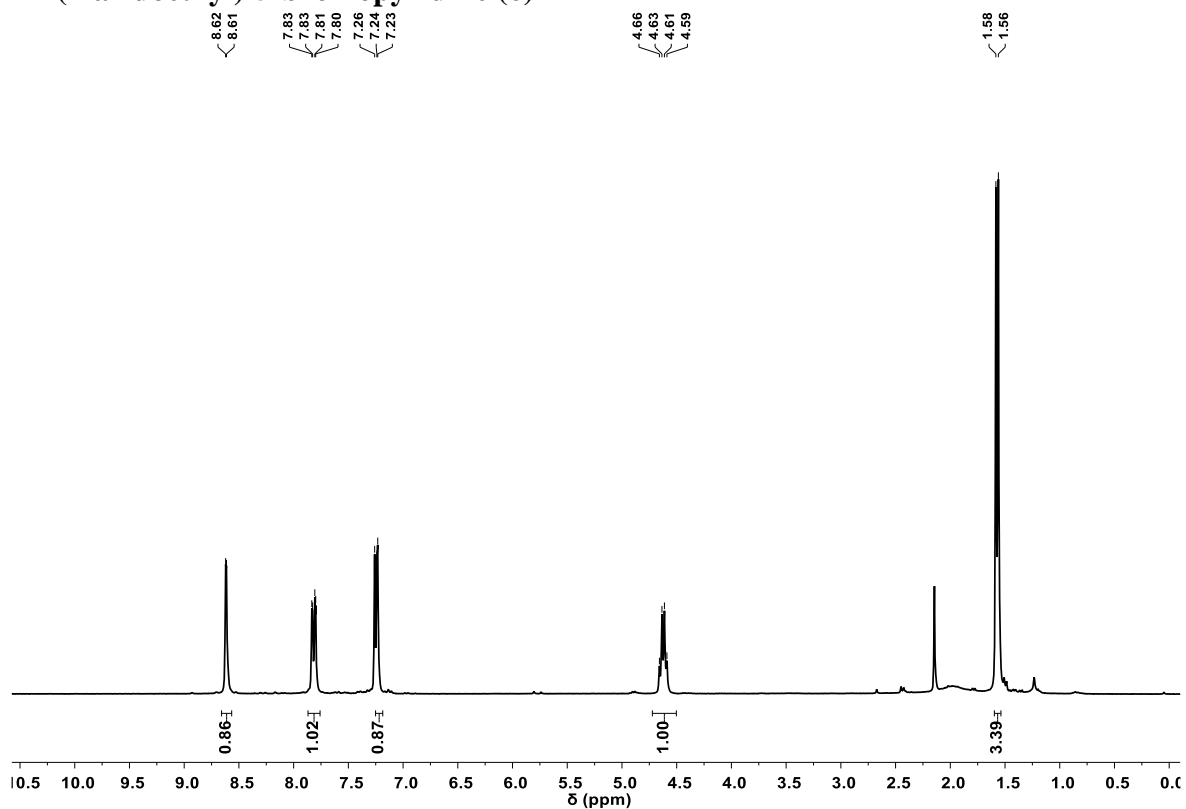

Figure S21 <sup>1</sup>H-NMR spectrum (300 MHz, 301 K, CDCl<sub>3</sub>) of 6.

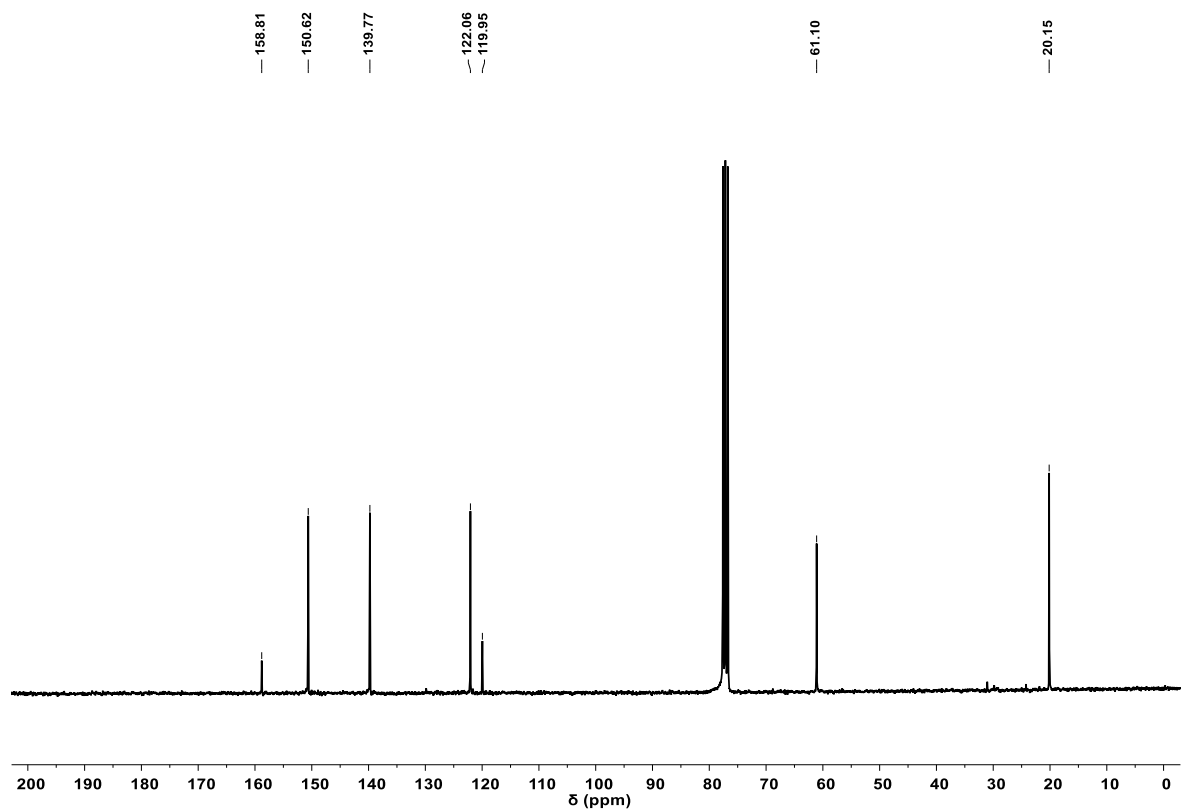

Figure S22 <sup>13</sup>C-NMR spectrum (75 MHz, 301 K, CDCl<sub>3</sub>) of 6.



## 9.4 1-(5-bromopyridin-2-yl)ethan-1-amine (7)

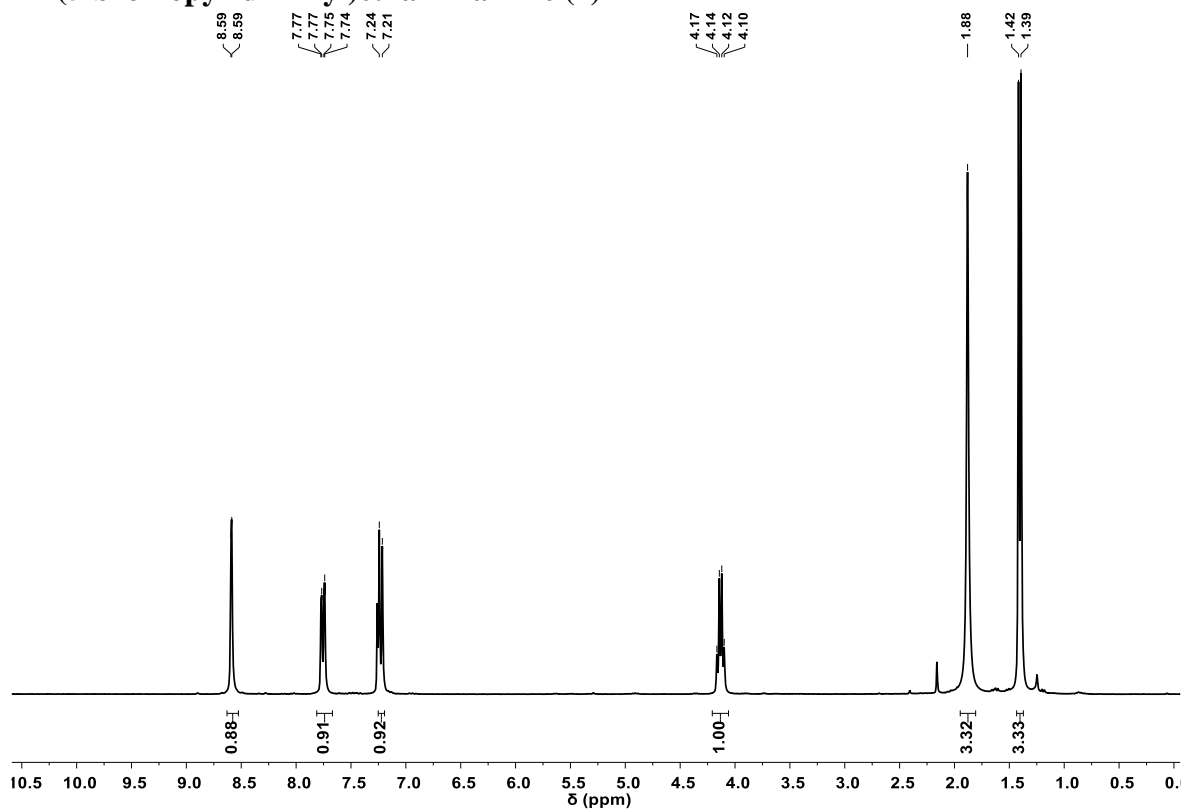

Figure S23 <sup>1</sup>H-NMR spectrum (300 MHz, 301 K, CDCl<sub>3</sub>) of 7.

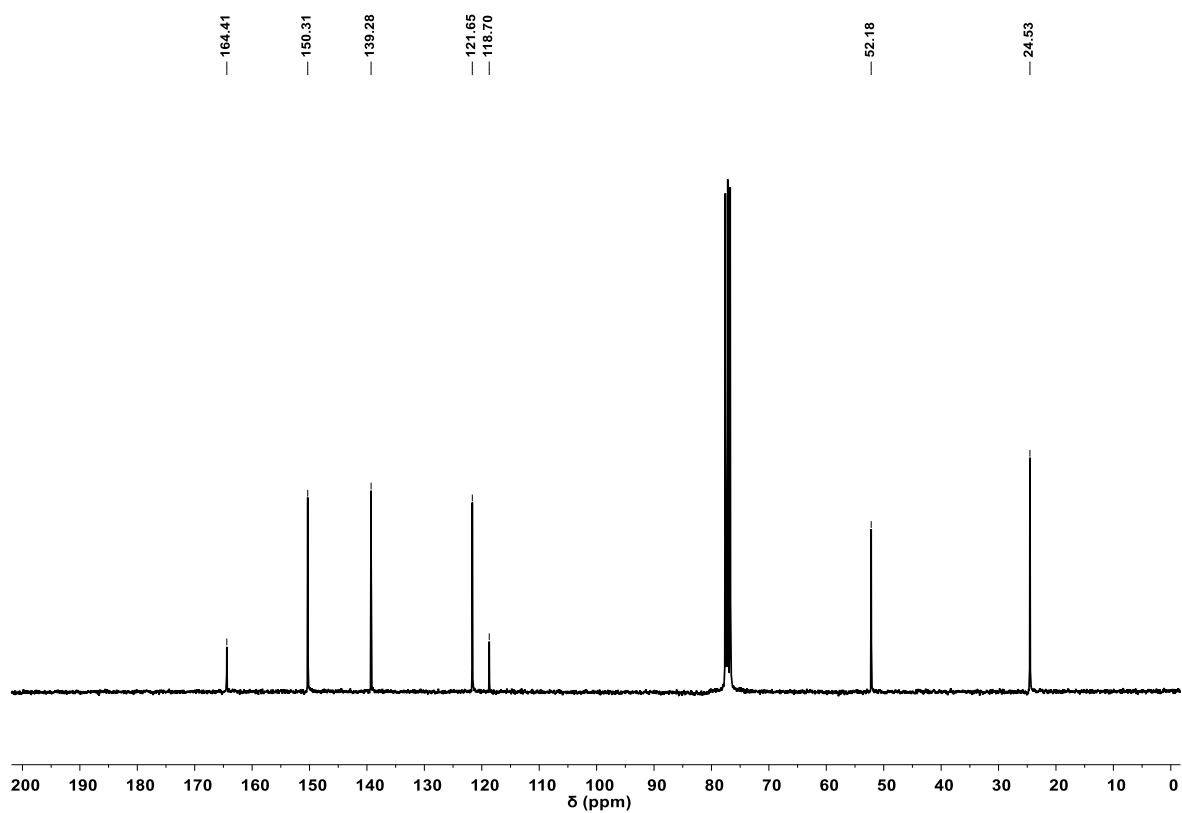

Figure S24 <sup>13</sup>C-NMR spectrum (75 MHz, 301 K, CDCl<sub>3</sub>) of 7.

9.5 *R*-(+)-1-(5-bromopyridin-2-yl)-*N,N*-bis((5-bromopyridin-2-yl)methyl)ethan-1-amine ((*R*)-8)

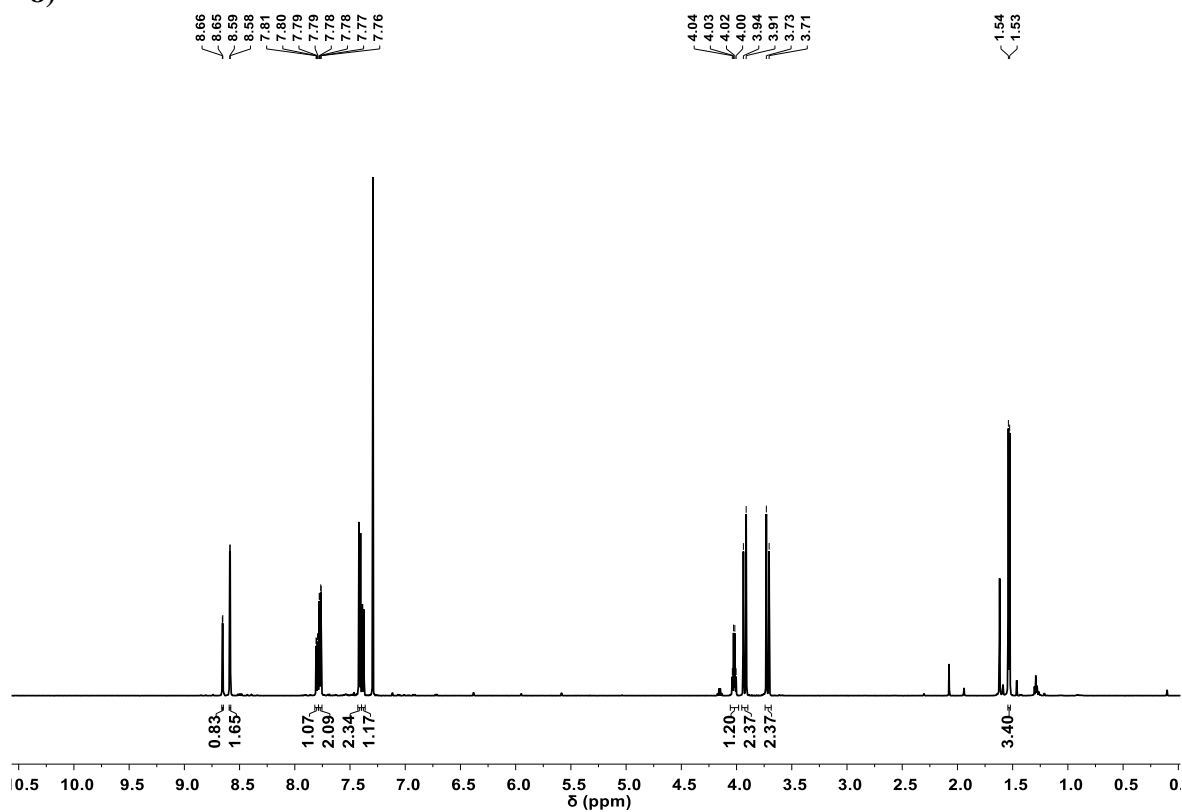

Figure S25 <sup>1</sup>H-NMR spectrum (600 MHz, 301 K, CDCl<sub>3</sub>) of (*R*)-8.

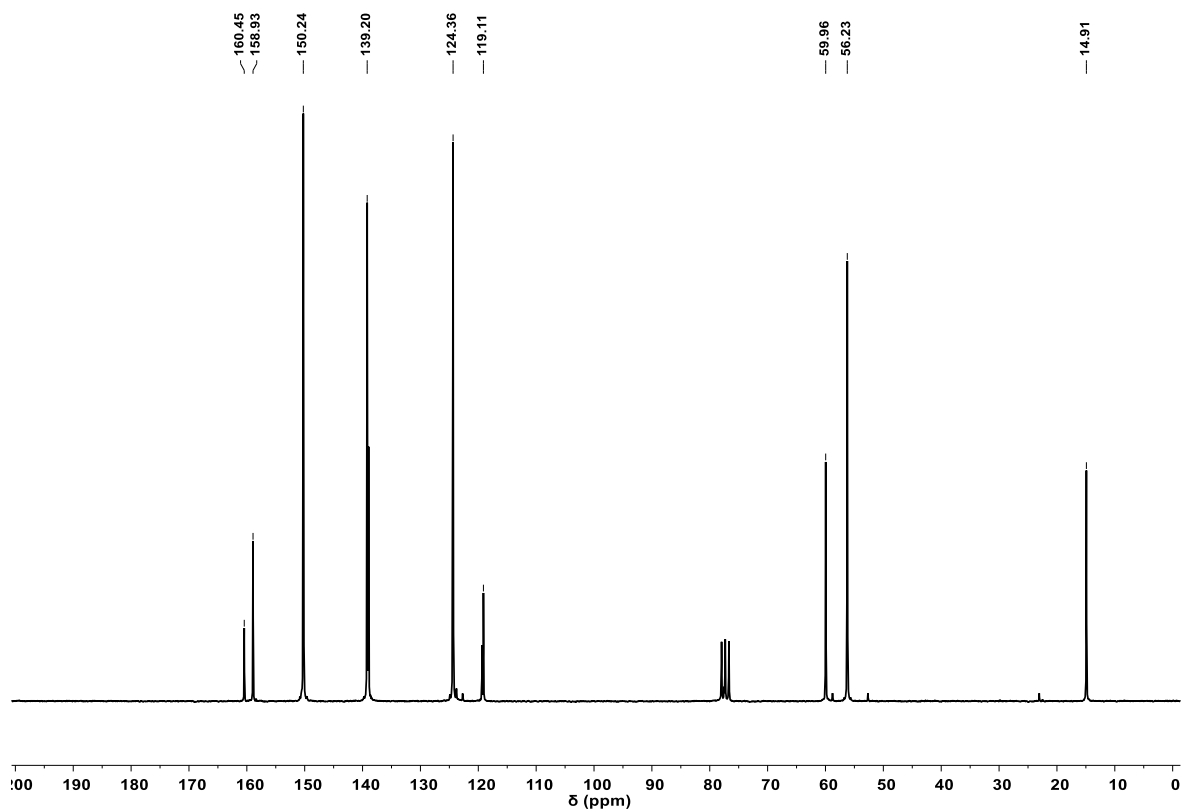

Figure S26 <sup>13</sup>C-NMR spectrum (75 MHz, 301 K, CDCl<sub>3</sub>) of (*R*)-8.

9.6 (*R*)-4,4'-((((1-(5-(4-formylphenyl)pyridin-2-yl)ethyl)azanediy) bis(methylene)) bis(pyridine-6,3-diyl)dibenzaldehyde (*R*)-9

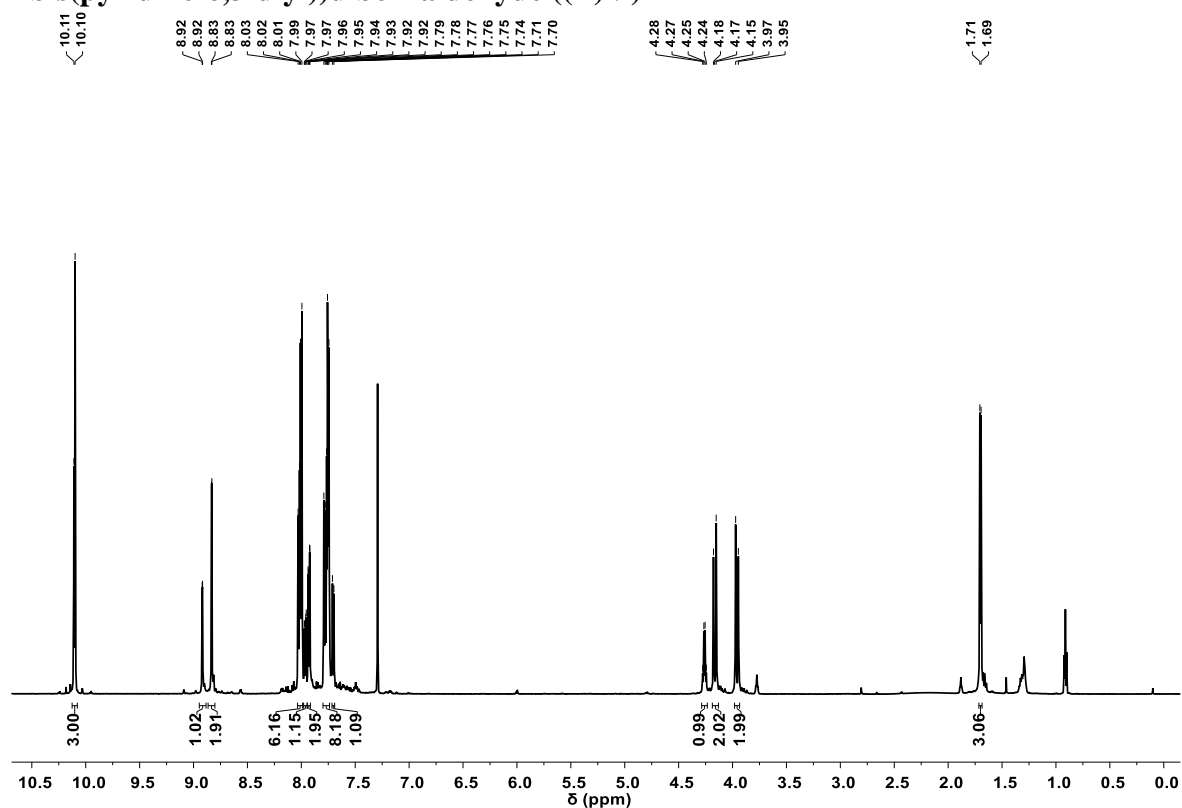

Figure S27 <sup>1</sup>H-NMR spectrum (600 MHz, 301 K, CDCl<sub>3</sub>) of (*R*)-9.

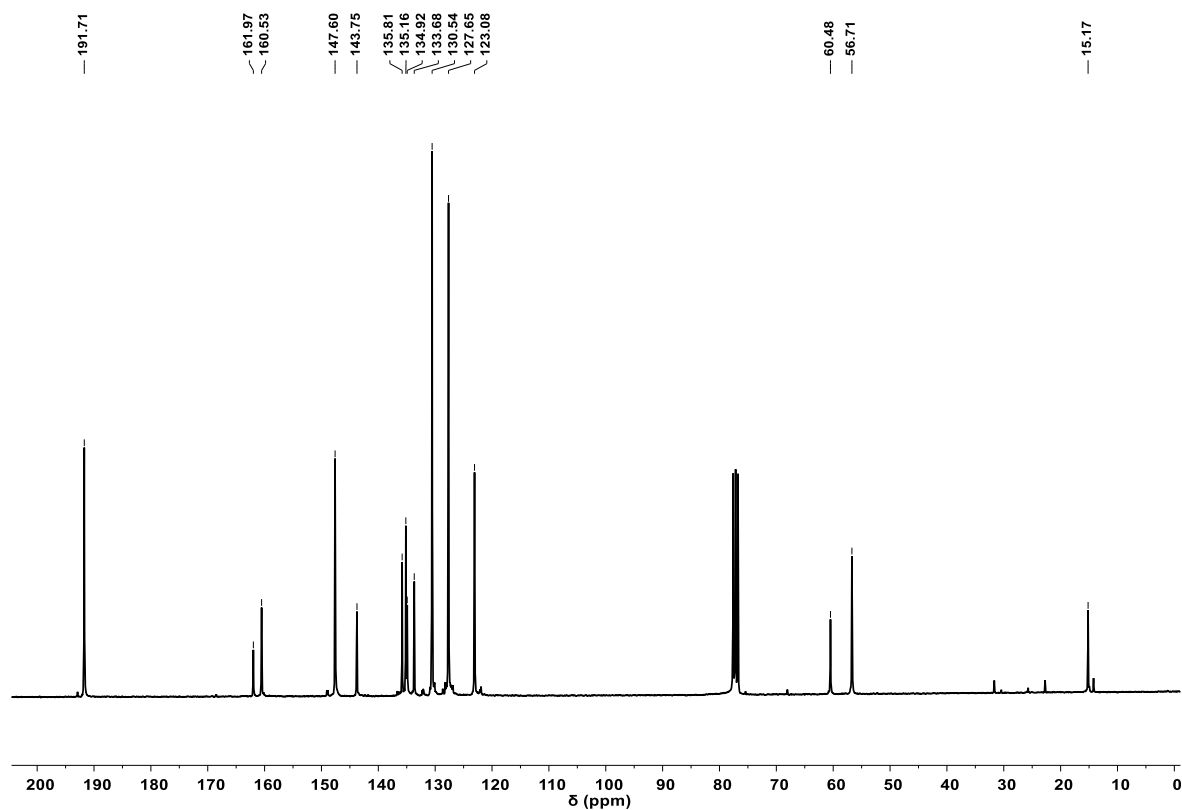

Figure S28 <sup>13</sup>C-NMR spectrum (75 MHz, 301 K, CDCl<sub>3</sub>) of (*R*)-9.

## 9.7 Complex (*R*)-1b

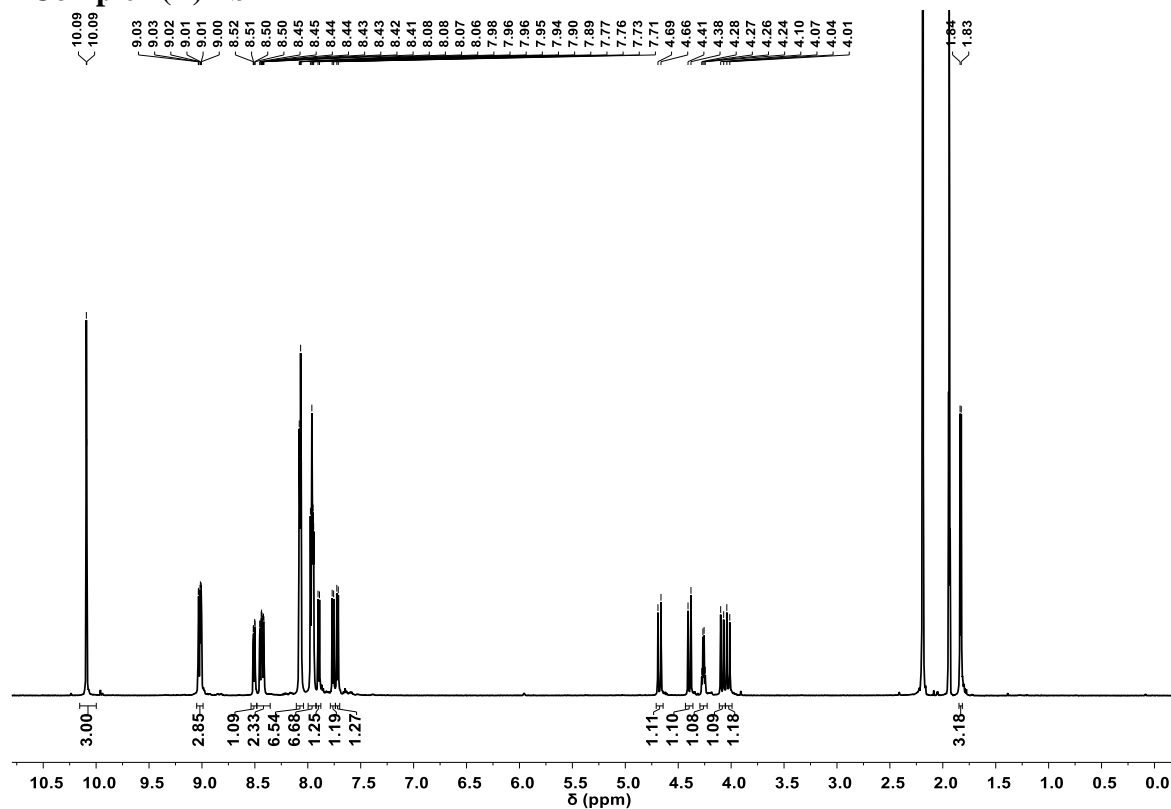

Figure S29  $^1\text{H-NMR}$  spectrum (600 MHz, 301 K,  $\text{CD}_3\text{CN}$ ) of complex (*R*)-1b.

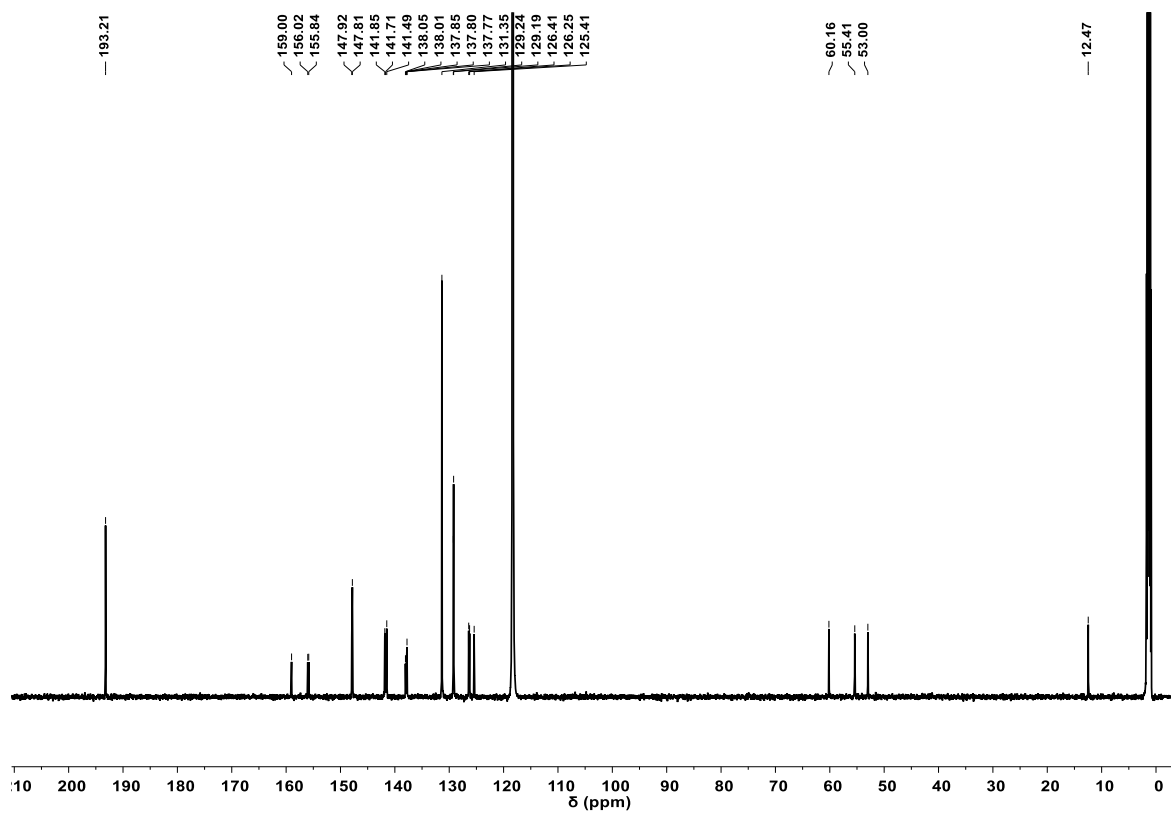

Figure S30  $^{13}\text{C-NMR}$  spectrum (151 MHz, 301 K,  $\text{CD}_3\text{CN}$ ) of complex (*R*)-1b.

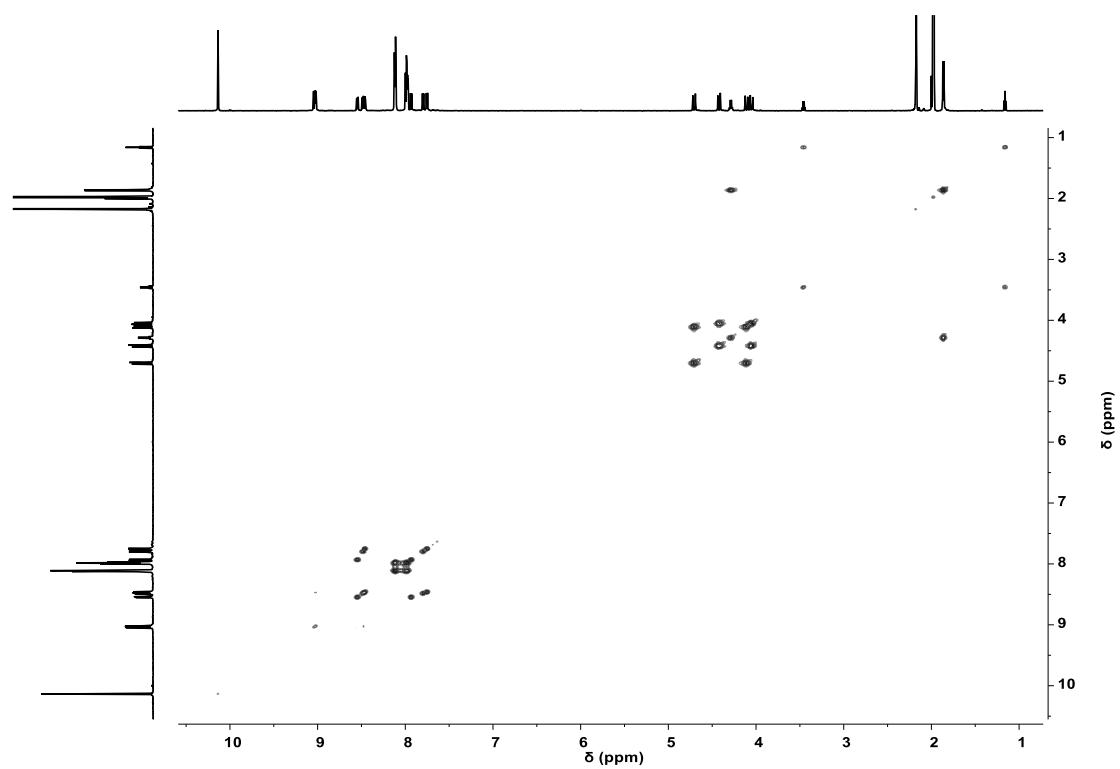

**Figure S31**  $^1\text{H}$ - $^1\text{H}$  COSY spectrum (600 MHz, 301 K,  $\text{CD}_3\text{CN}$ ) of complex (*R*)-**1b**.

## 9.8 L-Tar@2a

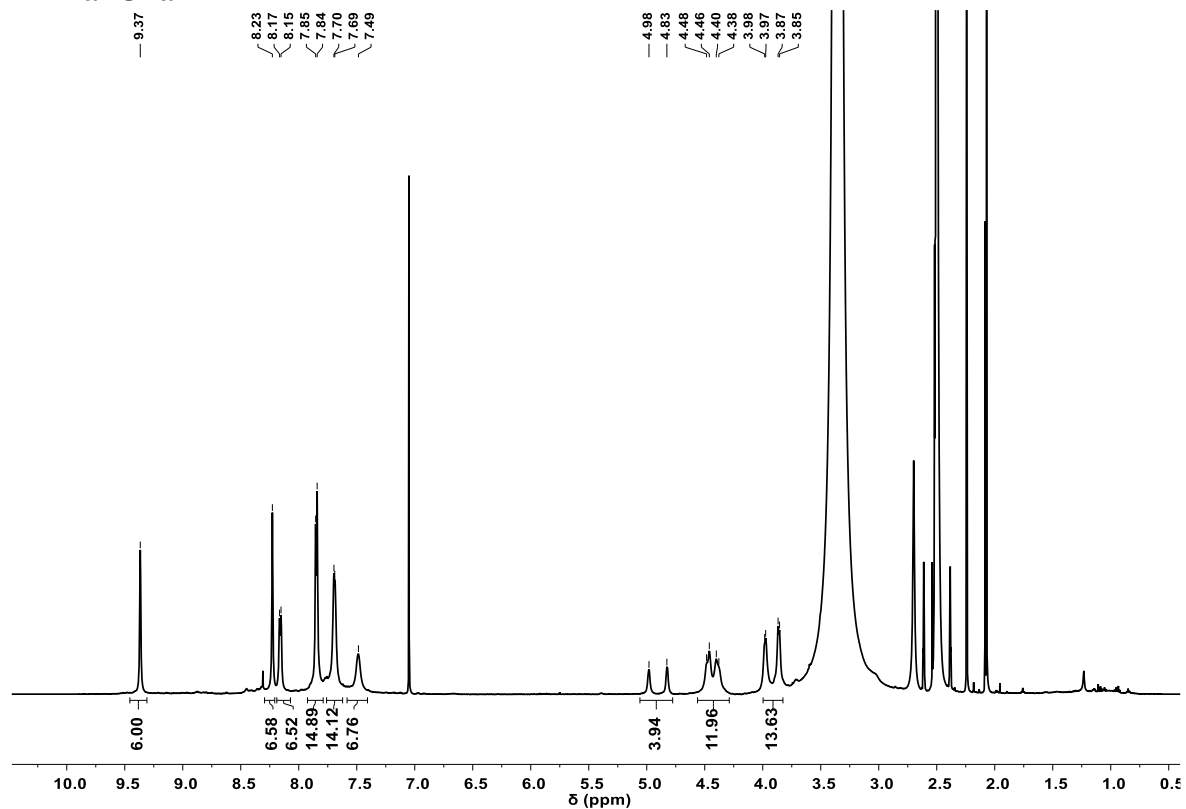

Figure S32  $^1\text{H-NMR}$  spectrum (600 MHz, 301 K,  $\text{DMSO-}d_6$ ) of cage **L-Tar@2a**.

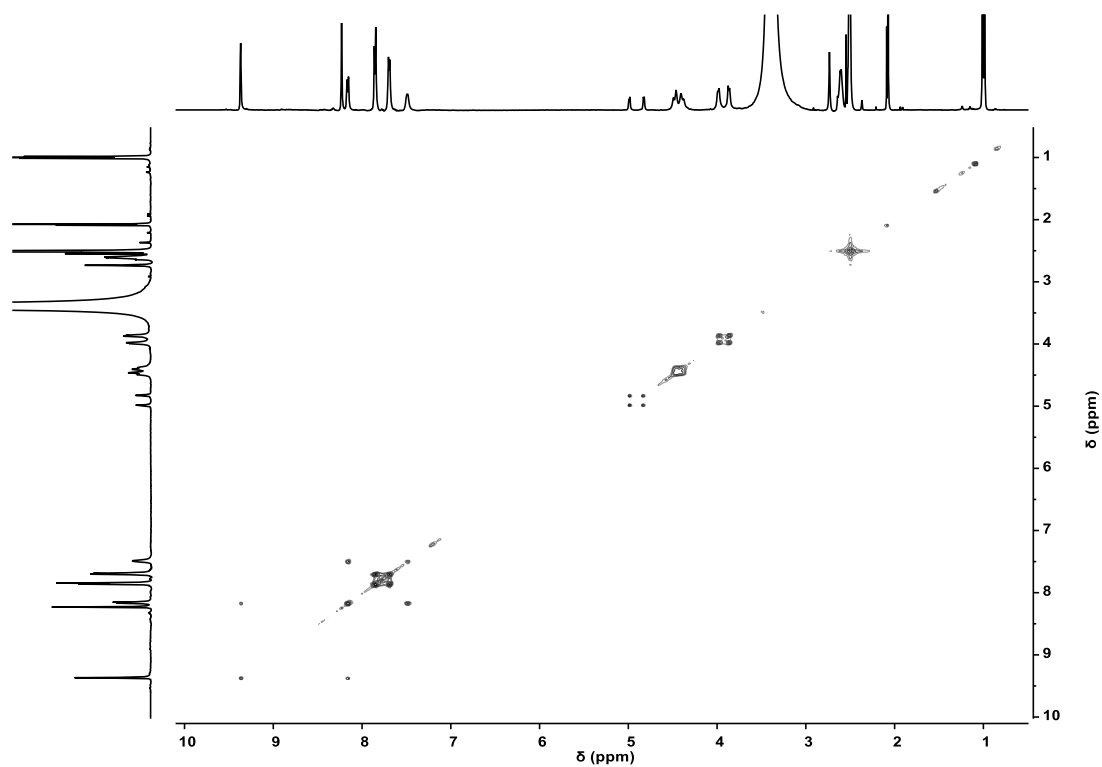

Figure S33  $^1\text{H-}^1\text{H}$  COSY spectrum (400 MHz, 301 K,  $\text{DMSO-}d_6$ ) of cage **L-Tar@2a**.

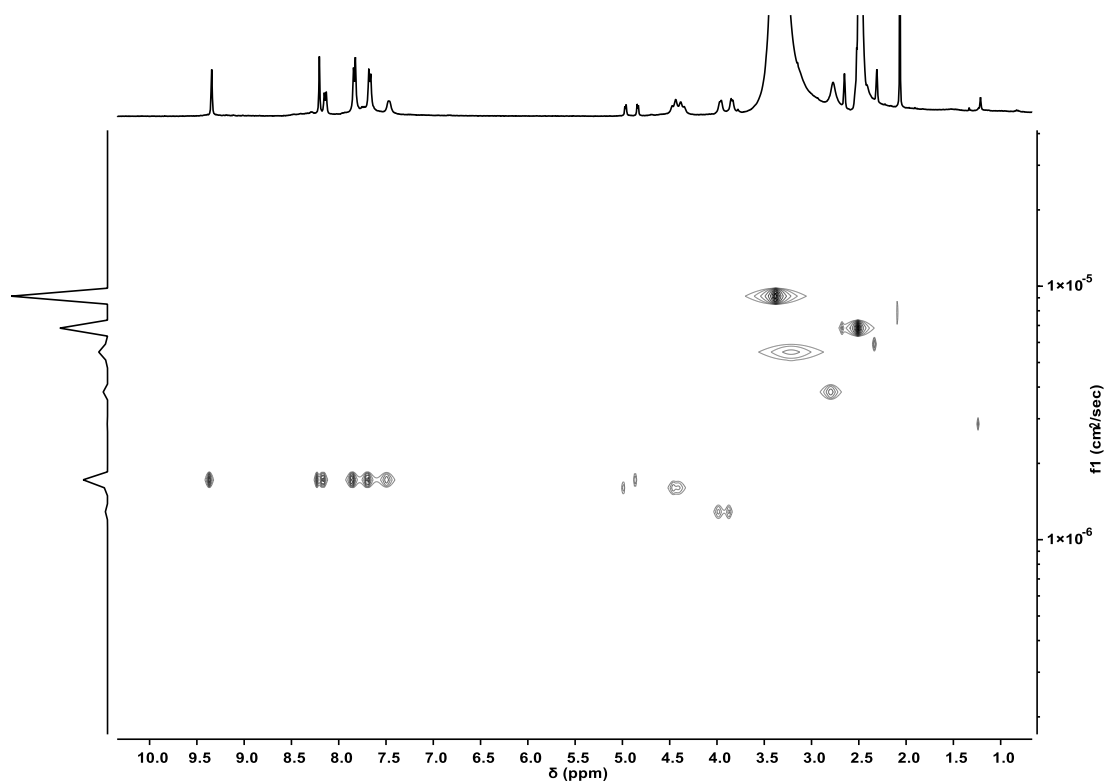

**Figure S34** DOSY spectrum (400 MHz, 301 K, DMSO- $d_6$ ) of cage **L-Tar@2a**. The diffusion coefficient for the molecular cage **L-Tar@2a** was calculated to be  $1.63 \times 10^{-10} \text{ m}^2 \text{ s}^{-1}$ , corresponding to a hydrodynamic radius ( $r_H$ ) of 6.8 Å. The hydrodynamic radius was calculated using Stokes-Einstein equation.<sup>2,3</sup>

## 9.9 L-Mal@2a

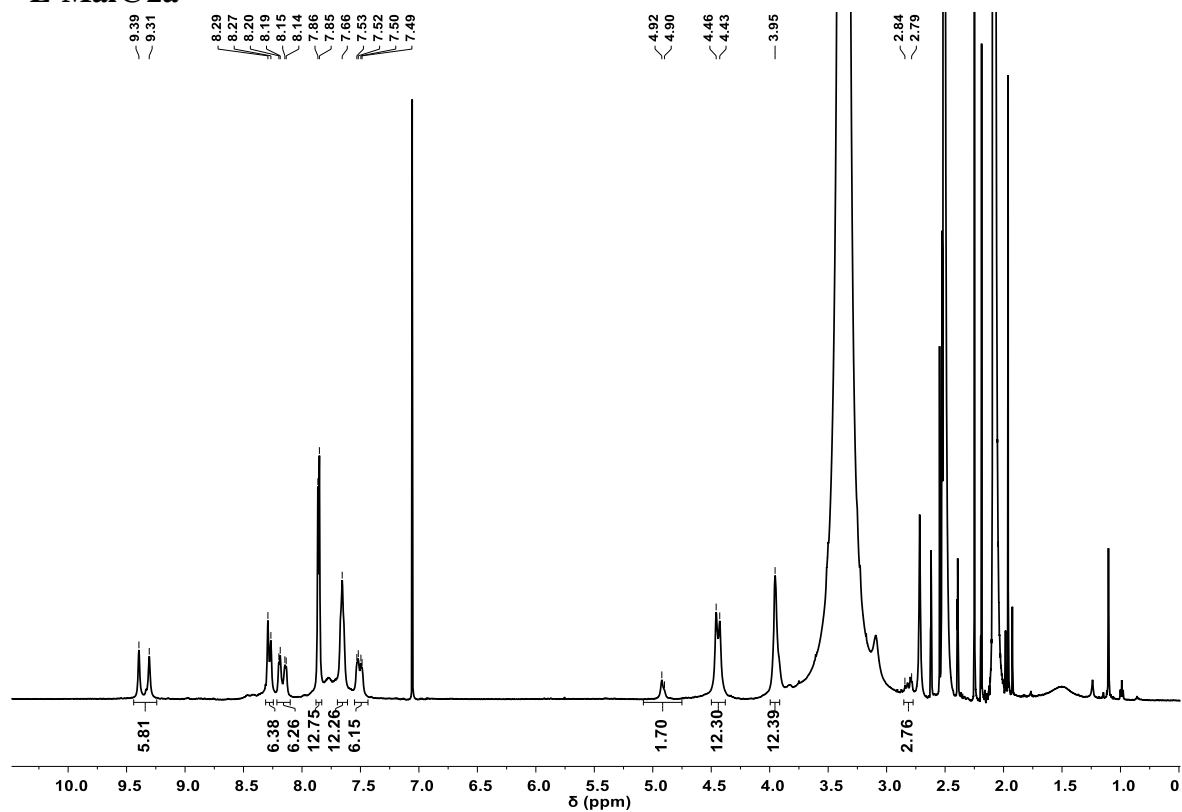

**Figure S35**  $^1\text{H}$ -NMR spectrum (600 MHz, 301 K, DMSO- $d_6$ ) of cage **L-Mal@2a**.

### 9.10 Suc@2a

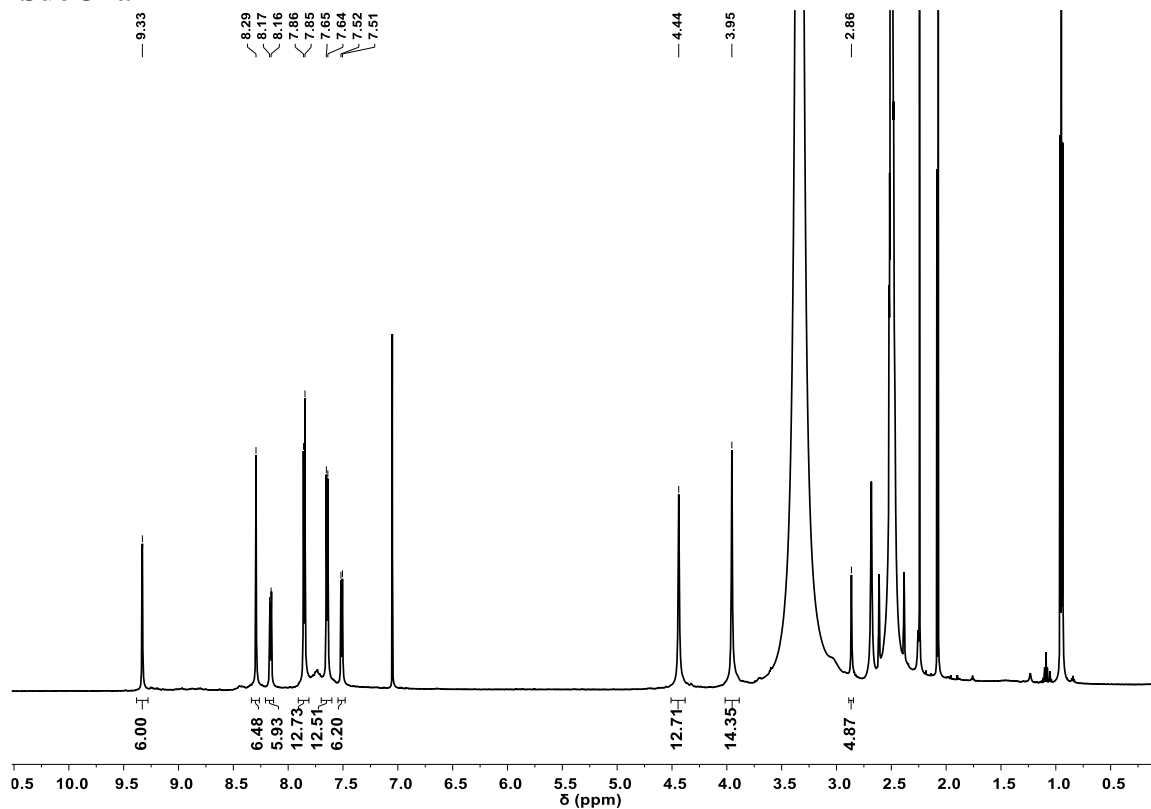

Figure S36  $^1\text{H-NMR}$  spectrum (600 MHz, 301 K,  $\text{DMSO-}d_6$ ) of cage **Suc@2a**.

### 9.11 Cit@2a

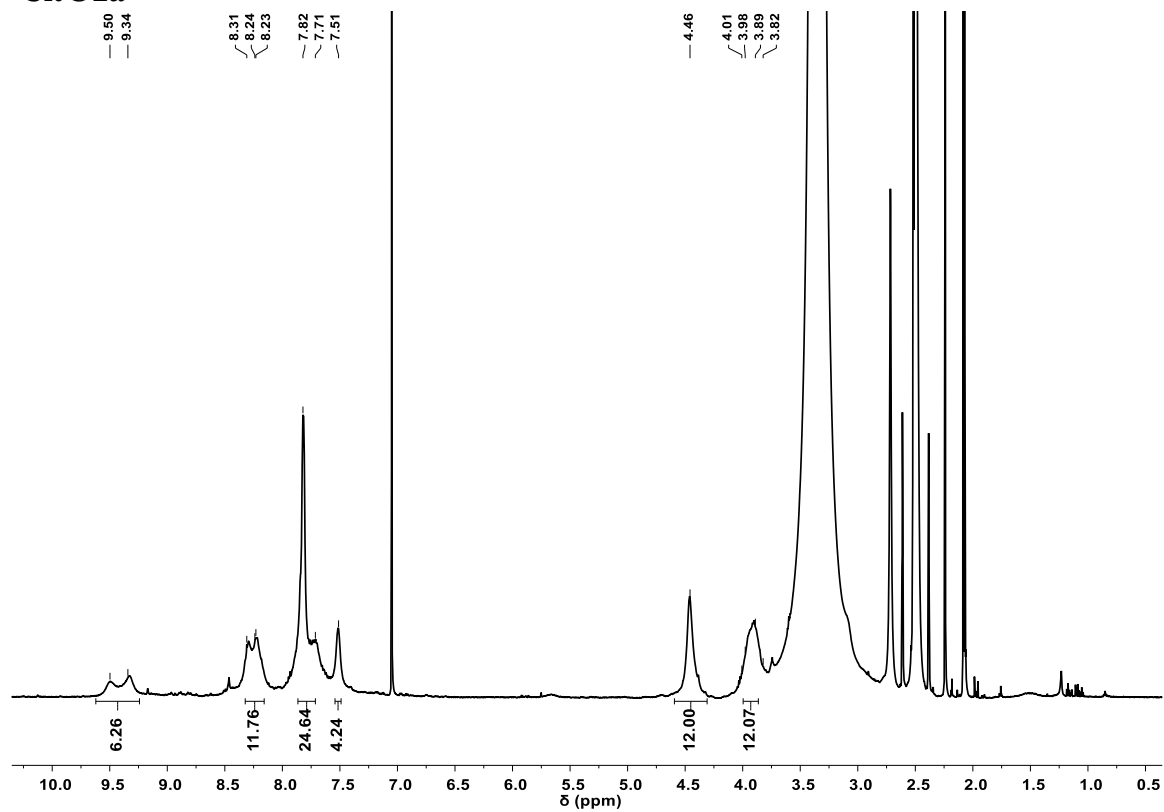

Figure S37  $^1\text{H-NMR}$  spectrum (600 MHz, 301 K,  $\text{DMSO-}d_6$ ) of cage **Cit@2a**.



## 9.12 L-Tar@(*R,R*)-2b

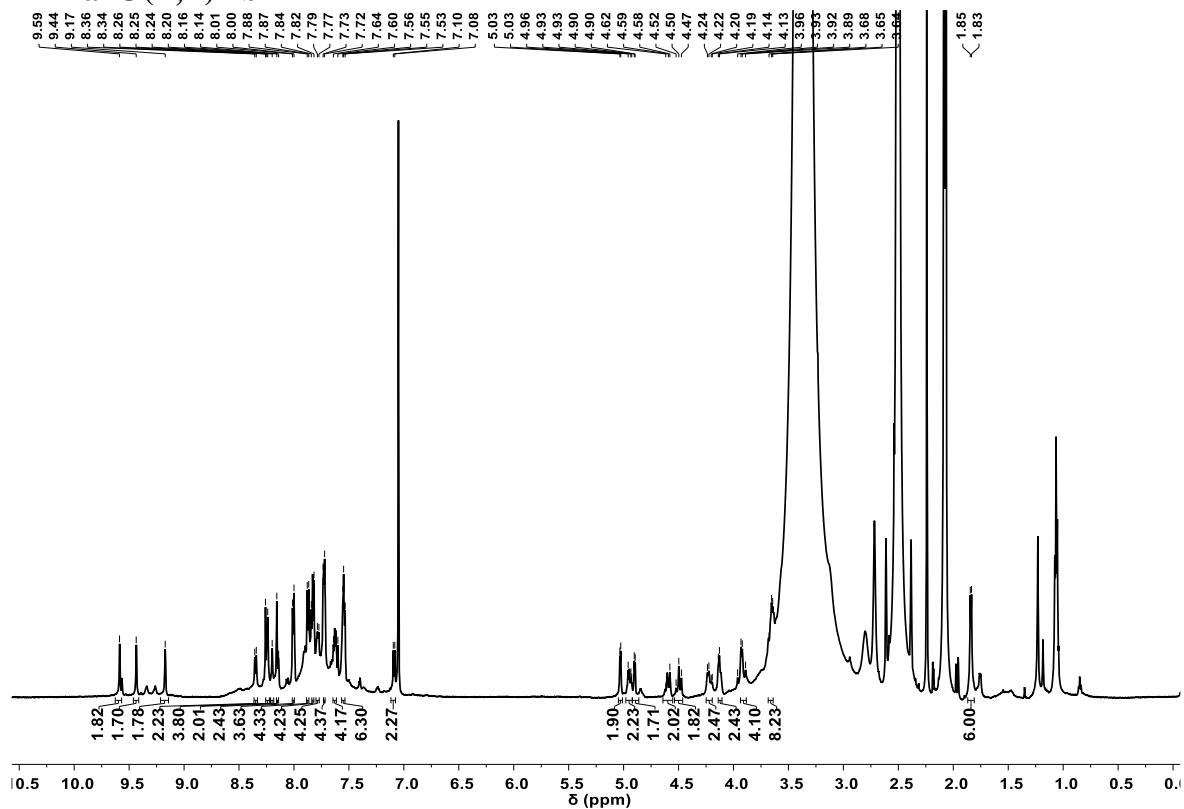

Figure S38  $^1\text{H-NMR}$  spectrum (600 MHz, 301 K,  $\text{DMSO-}d_6$ ) of cage **L-Tar@(*R,R*)-2b**.

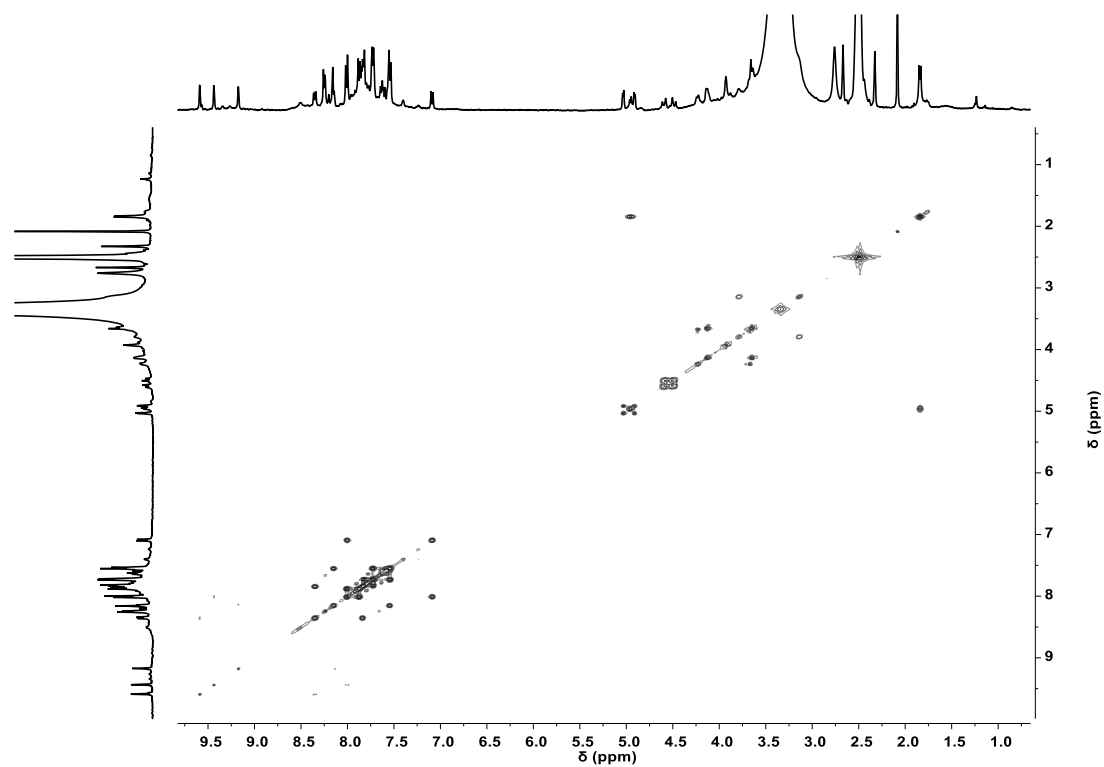

Figure S39  $^1\text{H-}^1\text{H}$  COSY spectrum (400 MHz, 301 K,  $\text{DMSO-}d_6$ ) of cage **L-Tar@(*R,R*)-2b**.

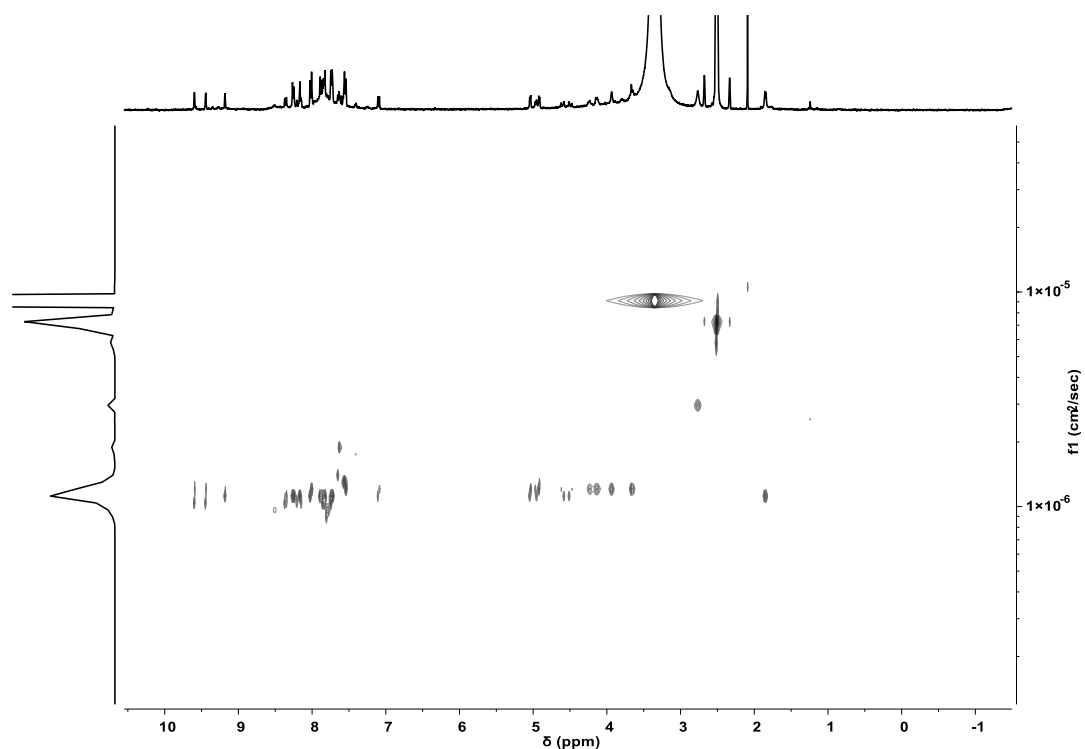

**Figure S40** DOSY spectrum (400 MHz, 301 K, DMSO- $d_6$ ) of cage **L-Tar@(*R,R*)-2b**. The diffusion coefficient for the molecular cage **L-Tar@(*R,R*)-2b** was calculated to be  $1.22 \times 10^{-10} \text{ m}^2 \text{ s}^{-1}$ , corresponding to a hydrodynamic radius ( $r_H$ ) of 9.08 Å. The hydrodynamic radius was calculated using Stokes-Einstein equation.<sup>2,3</sup>

### 9.13 D-Tar@(*R,R*)-2b

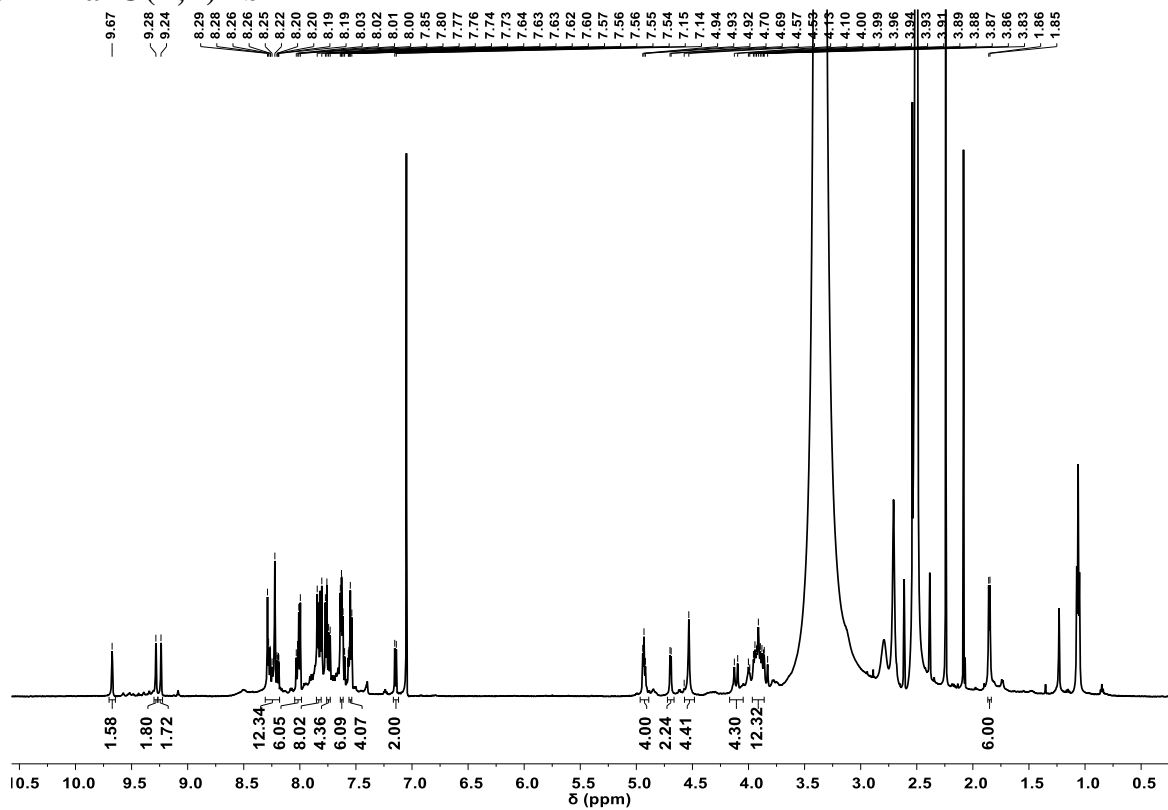

**Figure S41**  $^1\text{H-NMR}$  spectrum (600 MHz, 301 K, DMSO- $d_6$ ) of cage **D-Tar@(*R,R*)-2b**.

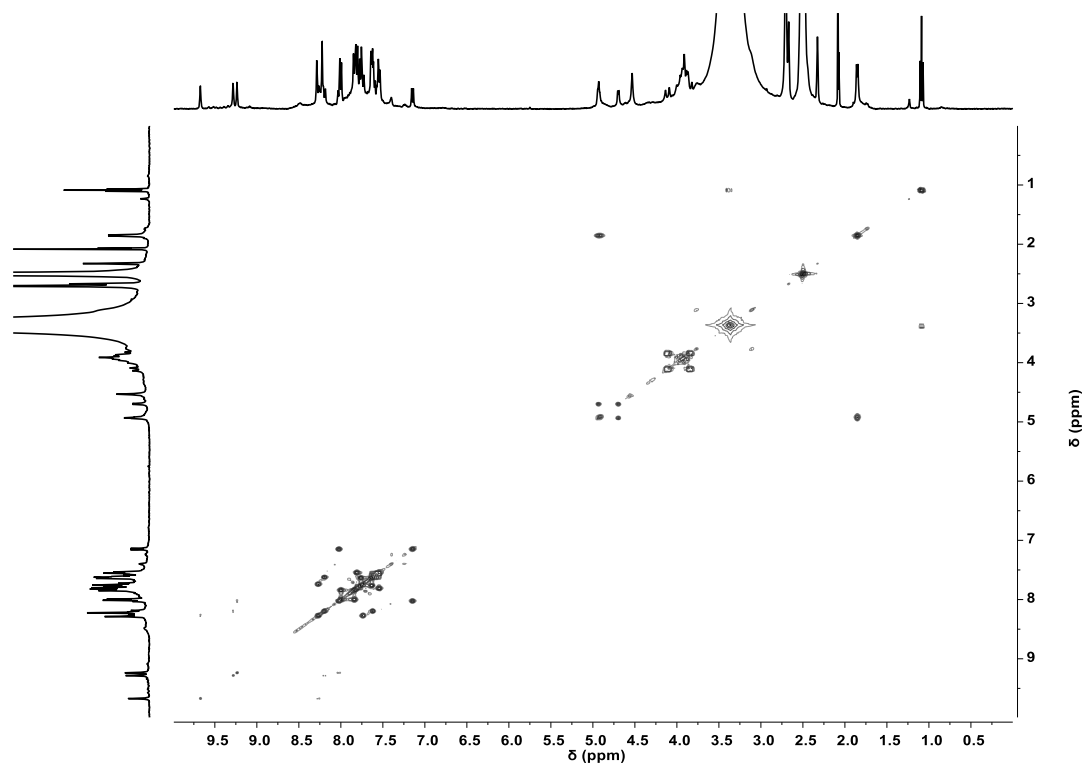

Figure S42  $^1\text{H}$ - $^1\text{H}$  COSY spectrum (400 MHz, 301 K,  $\text{DMSO-}d_6$ ) of cage **D-Tar@(*R,R*)-2b**.

### 9.14 L-Mal@(*R,R*)-2b

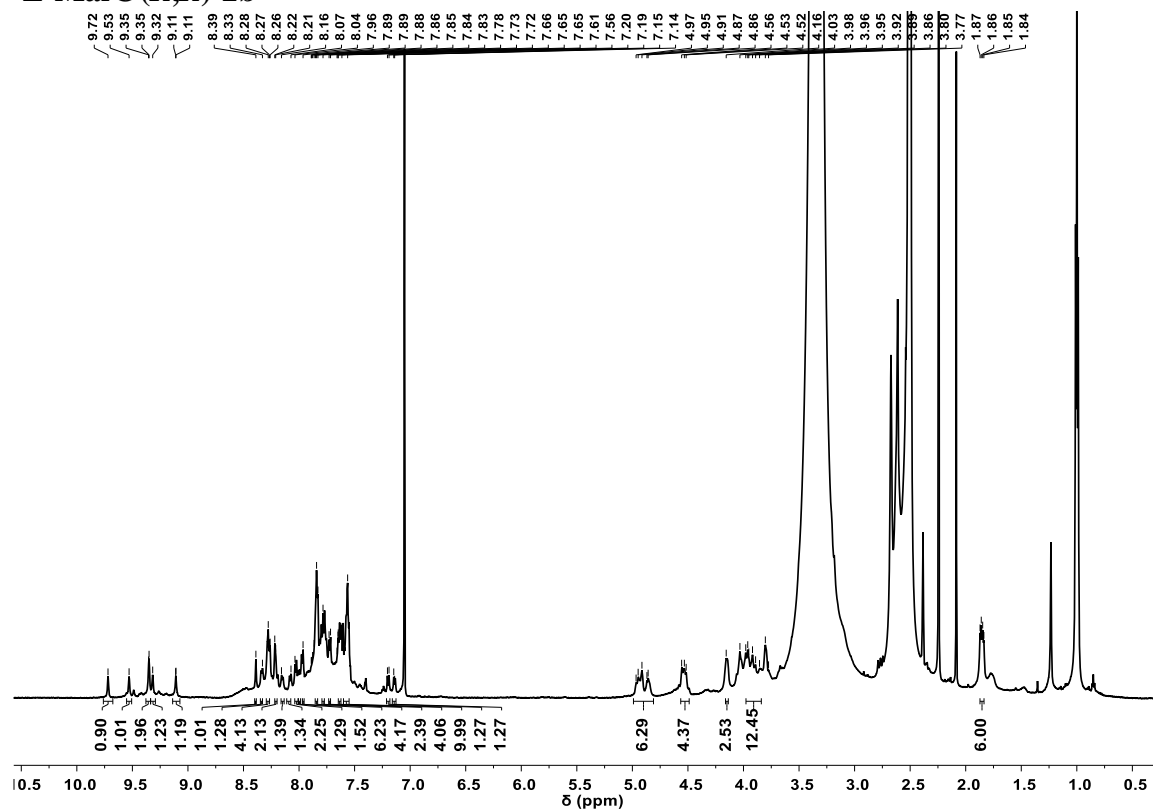

Figure S43  $^1\text{H}$ -NMR spectrum (600 MHz, 301 K,  $\text{DMSO-}d_6$ ) of cage **L-Mal@(*R,R*)-2b**.

### 9.15 D-Mal@(*R,R*)-2b

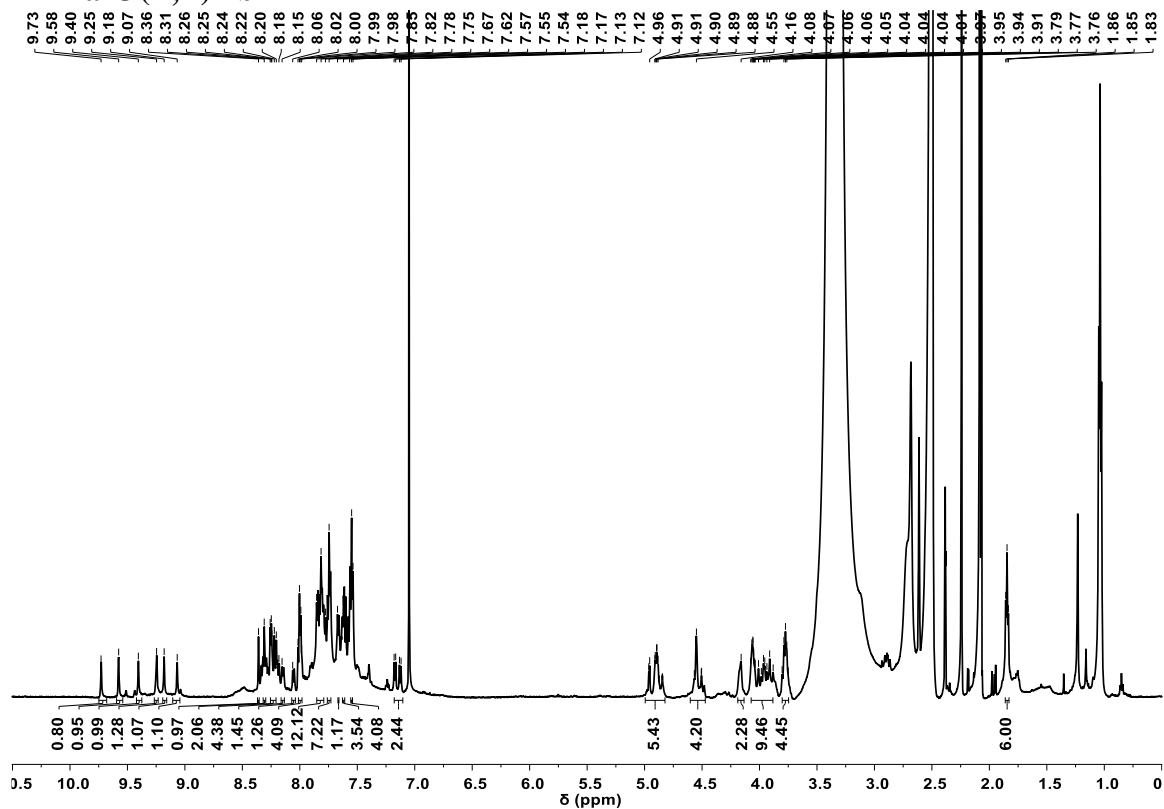

Figure S44  $^1\text{H-NMR}$  spectrum (600 MHz, 301 K,  $\text{DMSO-}d_6$ ) of cage **D-Mal@(*R,R*)-2b**.

### 9.16 Suc@(*R,R*)-2b

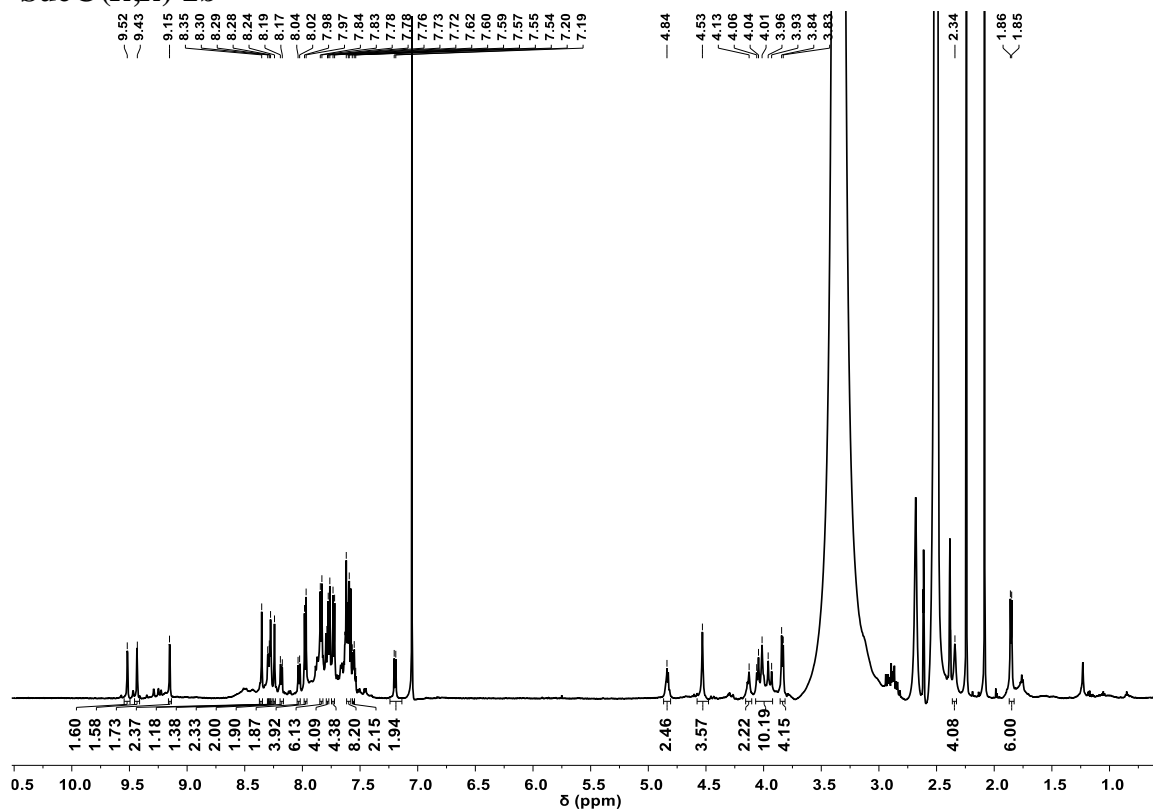

Figure S45  $^1\text{H-NMR}$  spectrum (600 MHz, 301 K,  $\text{DMSO-}d_6$ ) of cage **Suc@(*R,R*)-2b**.

### 9.17 Prosecco@2a

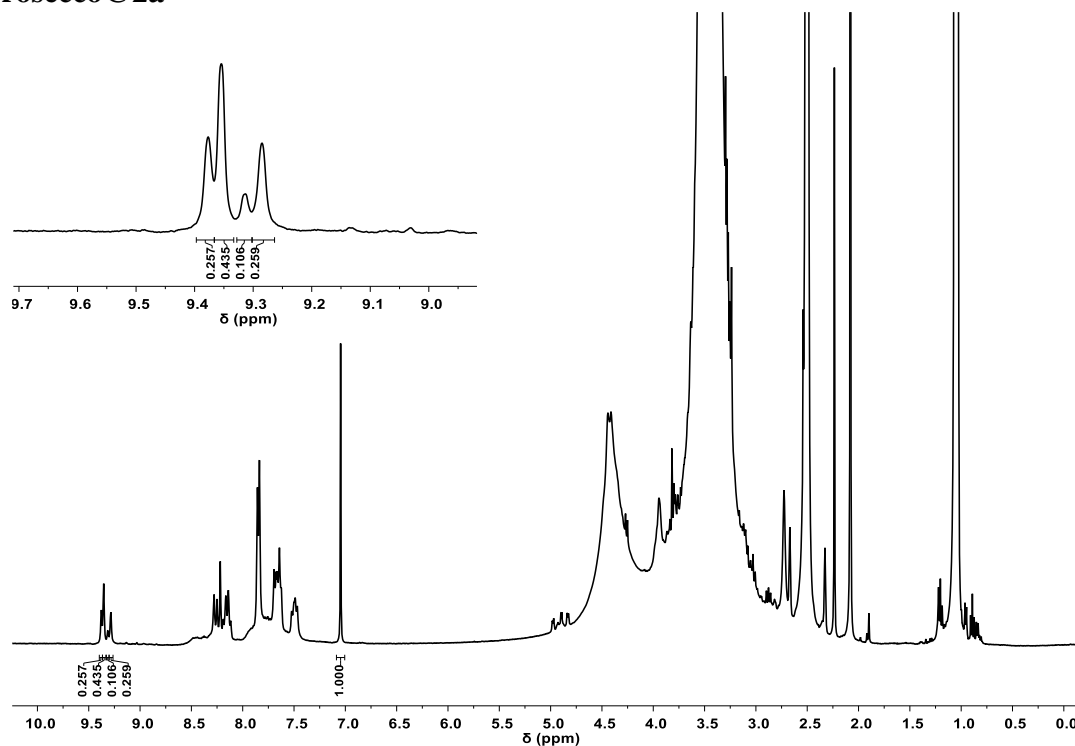

**Figure S46** <sup>1</sup>H-NMR spectrum (400 MHz, 301 K, DMSO-*d*<sub>6</sub>) of the system formed adding Prosecco wine without pre-treatment to the DMSO-*d*<sub>6</sub> solution containing complex **1a** and ethylenediamine.

### 9.18 Chianti@2a

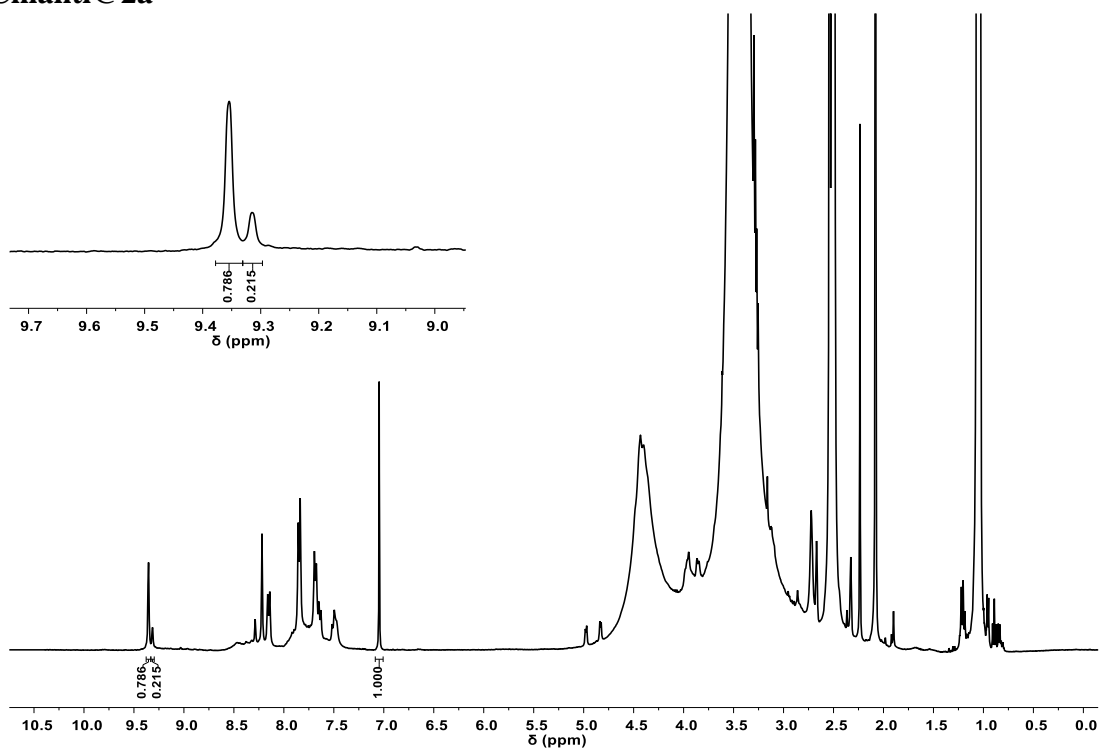

**Figure S47** <sup>1</sup>H-NMR spectrum (400 MHz, 301 K, DMSO-*d*<sub>6</sub>) of the system formed adding Chianti wine without pre-treatment to the DMSO-*d*<sub>6</sub> solution containing complex **1a** and ethylenediamine.

### 9.19 Chardonnay@2a

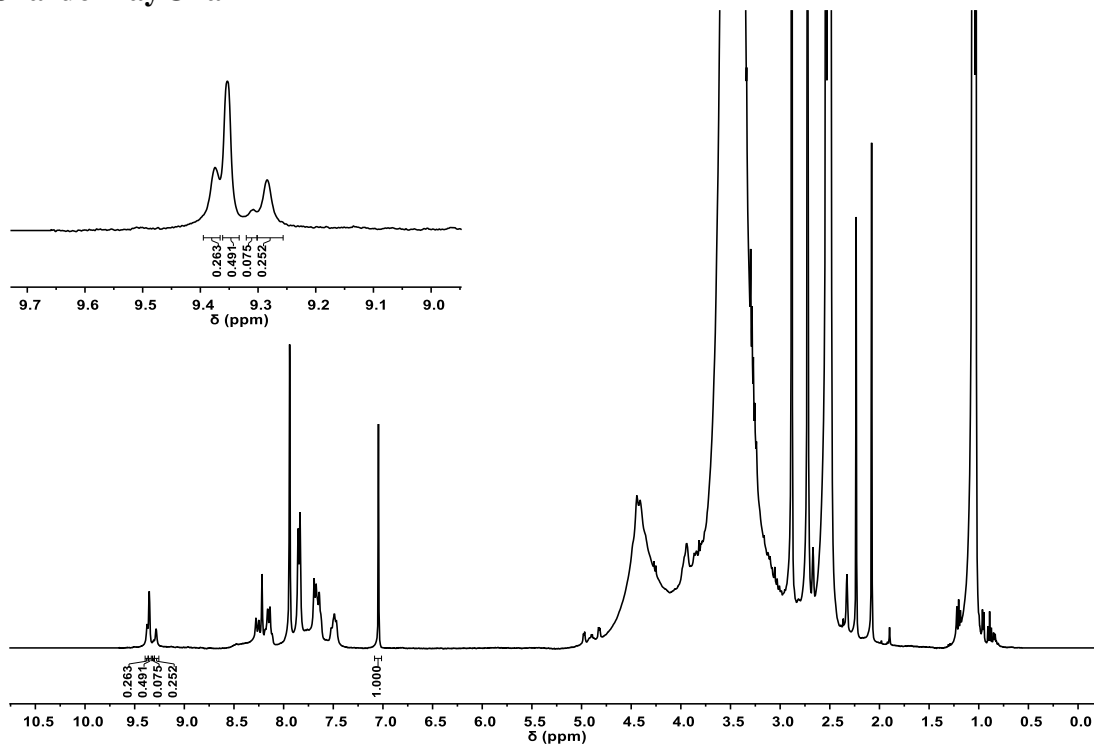

**Figure S48** <sup>1</sup>H-NMR spectrum (400 MHz, 301 K, DMSO-*d*<sub>6</sub>) of the system formed adding Chardonnay wine without pre-treatment to the DMSO-*d*<sub>6</sub> solution containing complex **1a** and ethylenediamine.

### 9.20 Valpolicella@2a

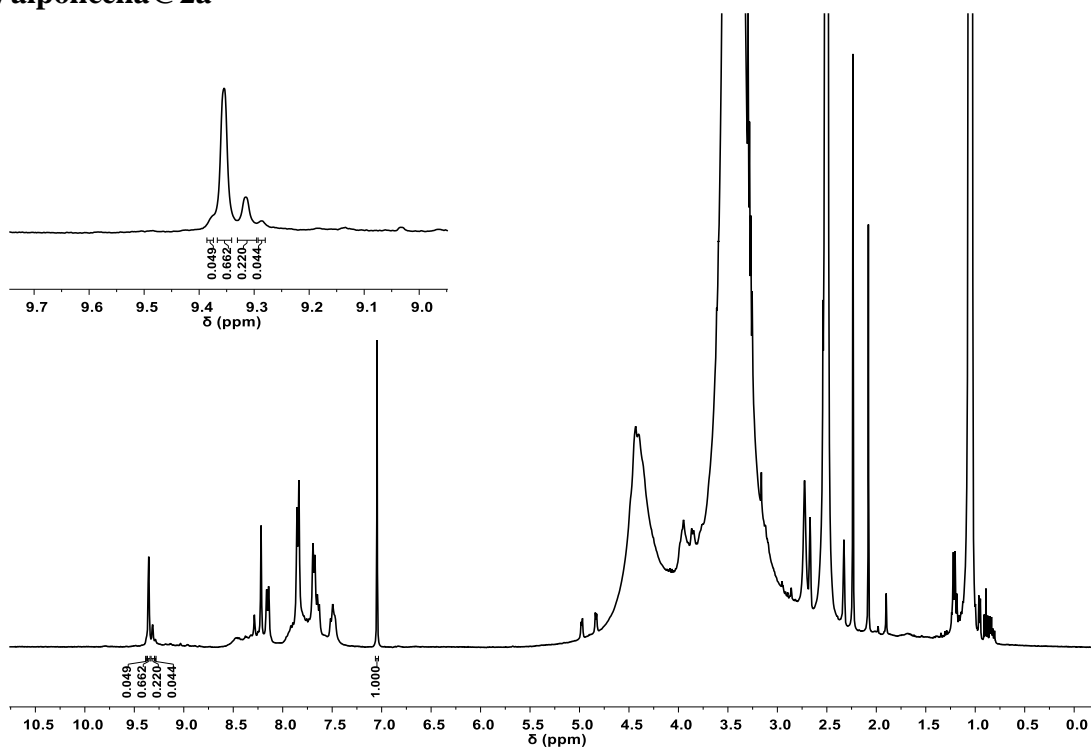

**Figure S49** <sup>1</sup>H-NMR spectrum (400 MHz, 301 K, DMSO-*d*<sub>6</sub>) of the system formed adding Valpolicella wine without pre-treatment to the DMSO-*d*<sub>6</sub> solution containing complex **1a** and ethylenediamine.

## 9.21 Müller-Thurgau@2a

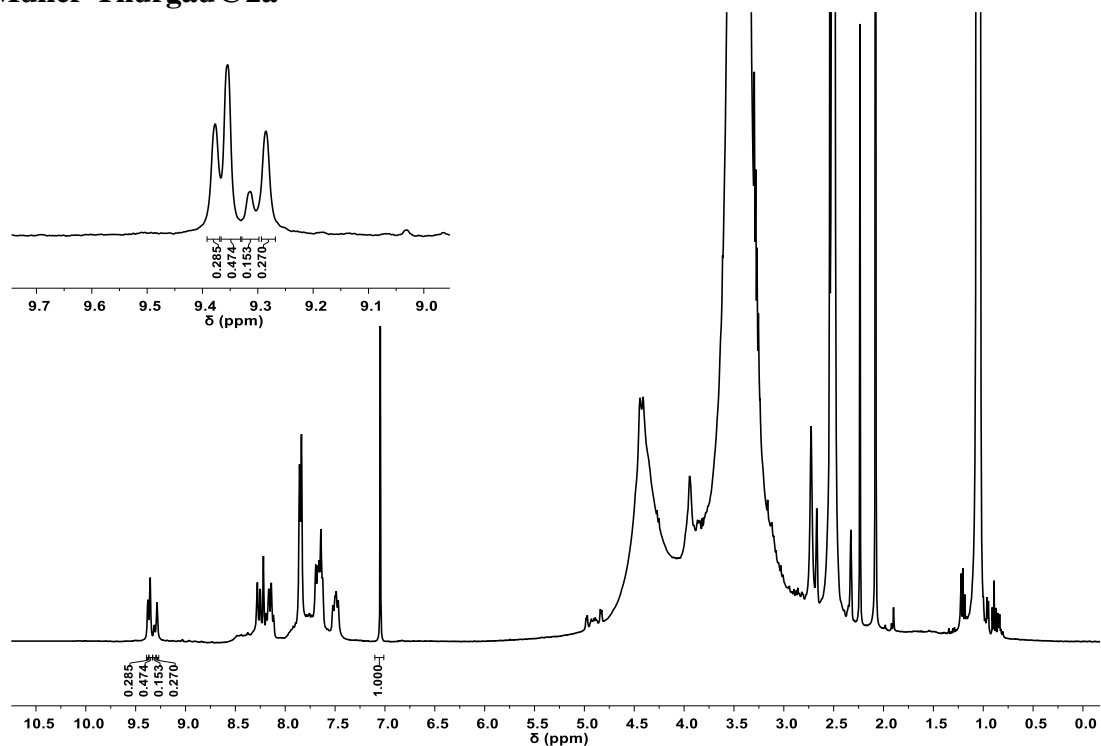

**Figure S50** <sup>1</sup>H-NMR spectrum (400 MHz, 301 K, DMSO-*d*<sub>6</sub>) of the system formed adding Müller-Thurgau wine without pre-treatment to the DMSO-*d*<sub>6</sub> solution containing complex **1a** and ethylenediamine.

## 9.22 Barbera@2a

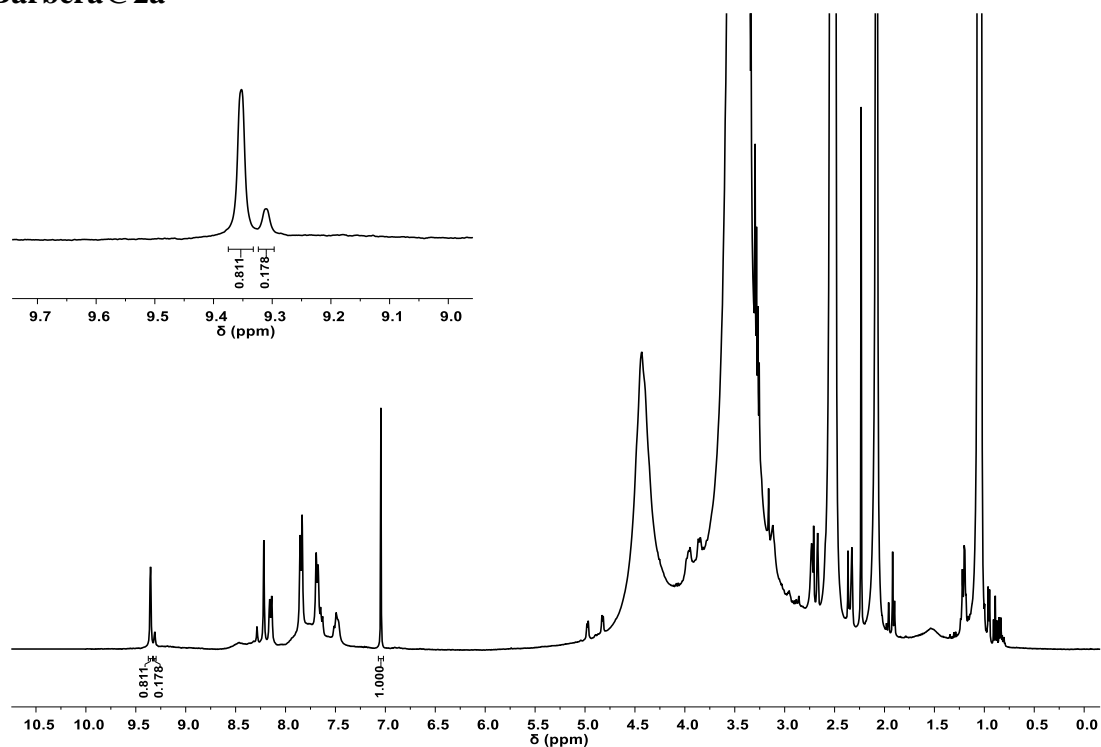

**Figure S51** <sup>1</sup>H-NMR spectrum (400 MHz, 301 K, DMSO-*d*<sub>6</sub>) of the system formed adding Barbera wine without pre-treatment to the DMSO-*d*<sub>6</sub> solution containing complex **1a** and ethylenediamine.

### 9.23 Grapes Juice Squeezed@2a

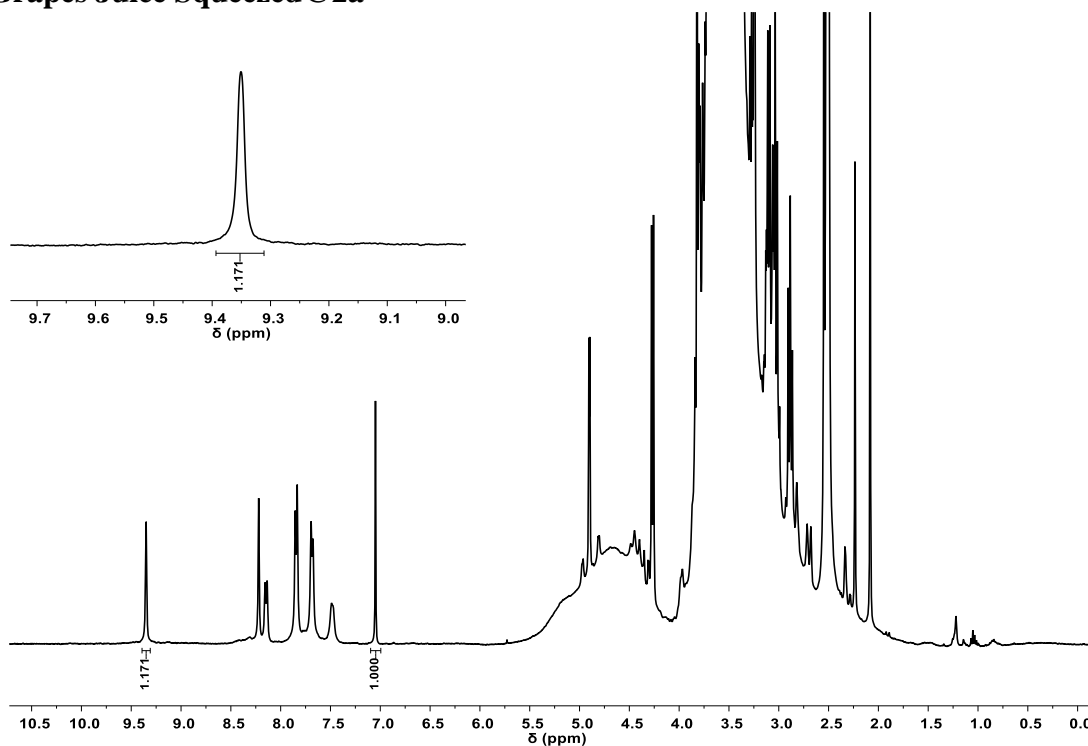

**Figure S52** <sup>1</sup>H-NMR spectrum (400 MHz, 301 K, DMSO-*d*<sub>6</sub>) of the system formed adding freshly squeezed grapes juice without pre-treatment to the DMSO-*d*<sub>6</sub> solution containing complex **1a** and ethylenediamine.

### 9.24 Blueberry Alcenera@2a

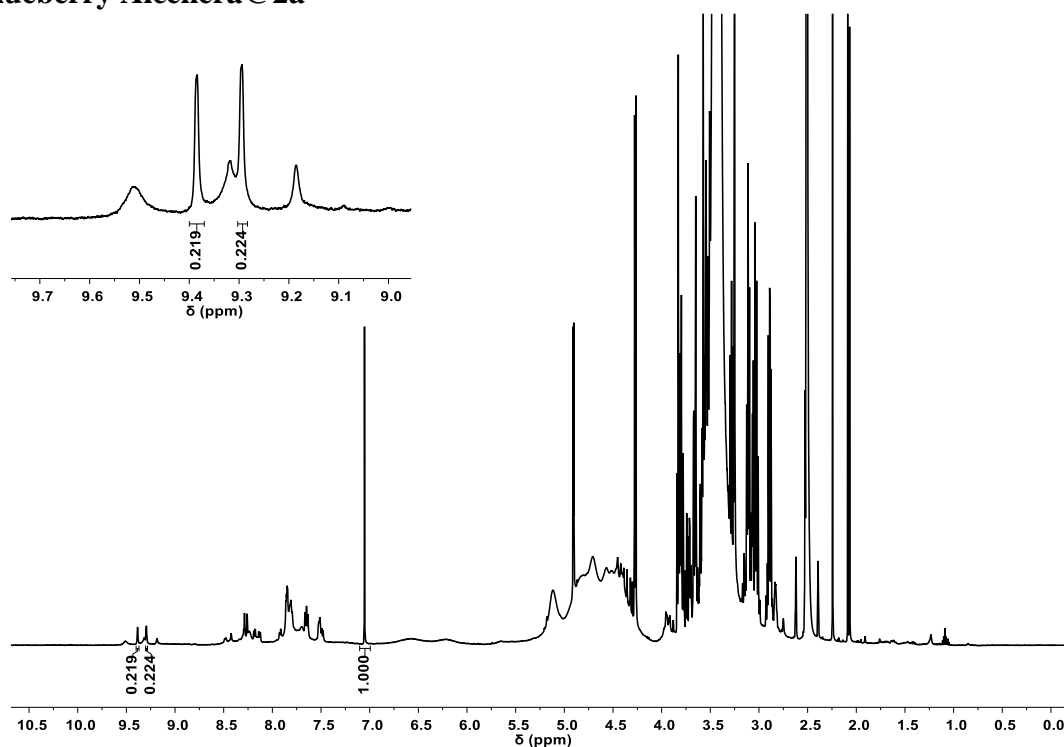

**Figure S53** <sup>1</sup>H-NMR spectrum (600 MHz, 301 K, DMSO-*d*<sub>6</sub>) of the system formed adding Blueberry juice without pre-treatment to the DMSO-*d*<sub>6</sub> solution containing complex **1a** and ethylenediamine.



## 9.25 Blueberry Zuegg@2a

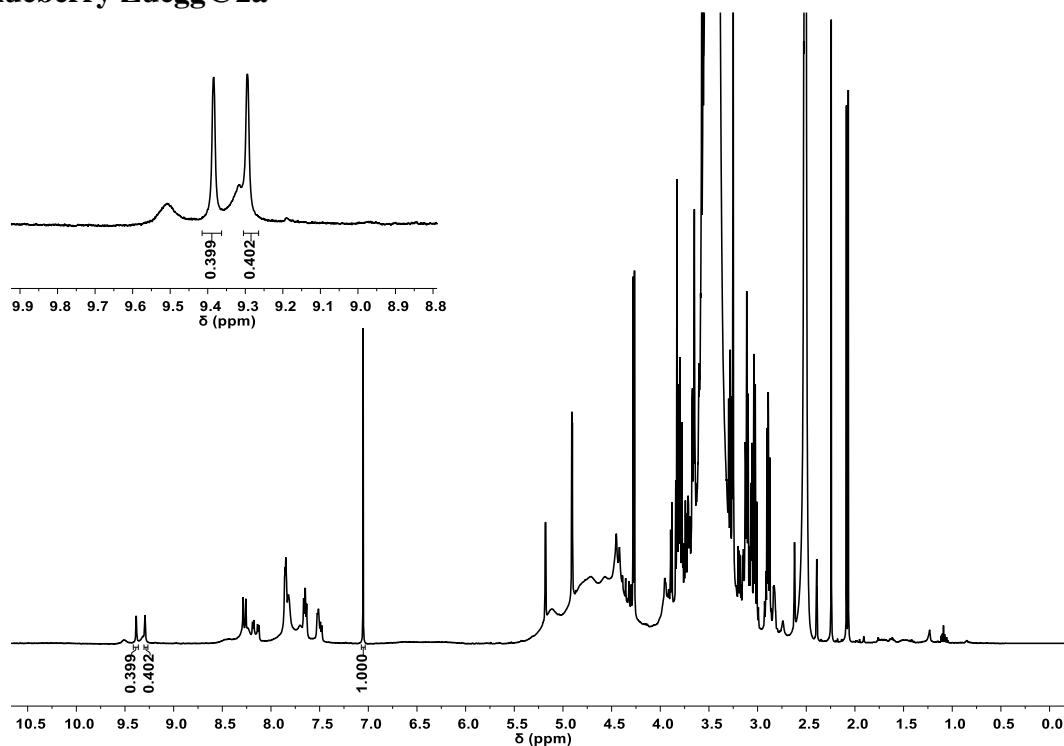

**Figure S54** <sup>1</sup>H-NMR spectrum (400 MHz, 301 K, DMSO-*d*<sub>6</sub>) of the system formed adding Blueberry juice without pre-treatment to the DMSO-*d*<sub>6</sub> solution containing complex **1a** and ethylenediamine.

## 9.26 Blueberry Juice Squeezed@2a

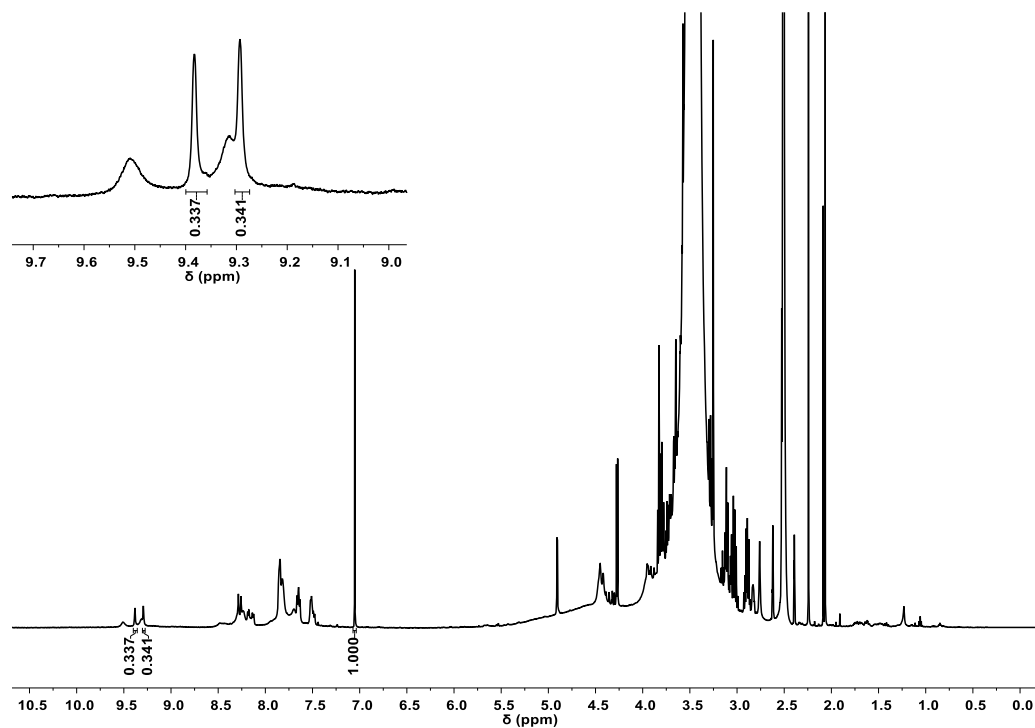

**Figure S55** <sup>1</sup>H-NMR spectrum (600 MHz, 301 K, DMSO-*d*<sub>6</sub>) of the system formed adding freshly squeezed Blueberry juice without pre-treatment to the DMSO-*d*<sub>6</sub> solution containing complex **1a** and ethylenediamine.

## 9.27 Apple Juice@2a

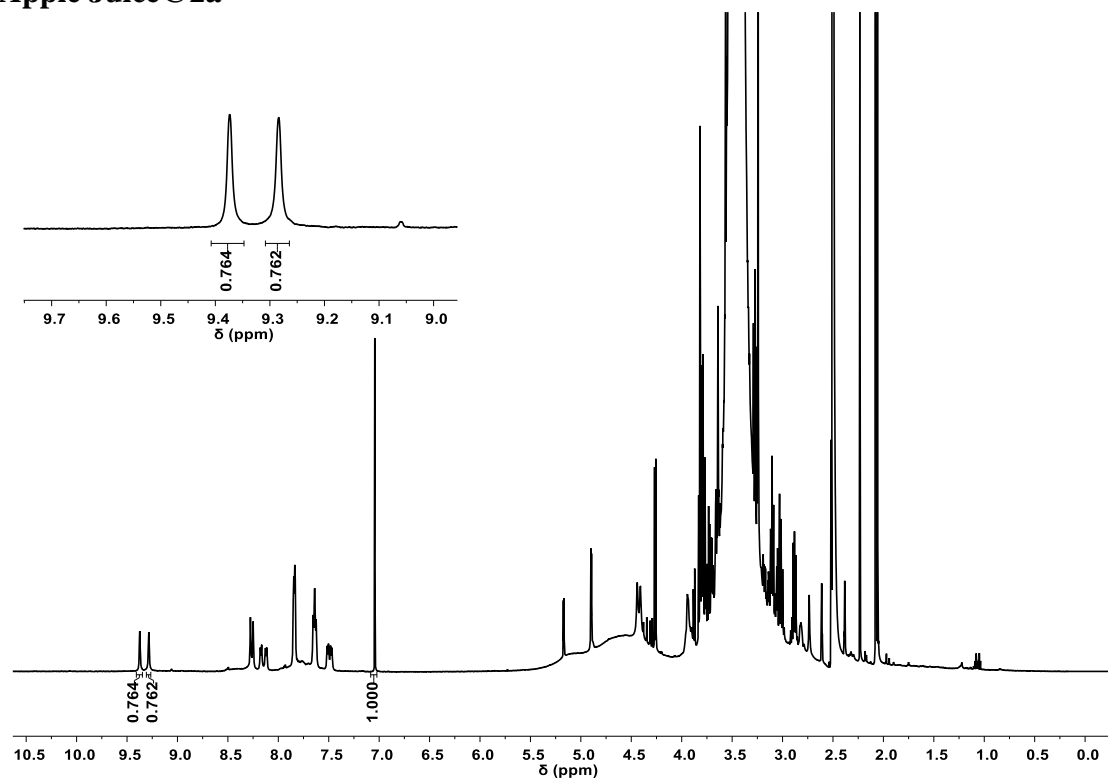

**Figure S56** <sup>1</sup>H-NMR spectrum (400 MHz, 301 K, DMSO-*d*<sub>6</sub>) of the system formed adding Apple juice without pre-treatment to the DMSO-*d*<sub>6</sub> solution containing complex **1a** and ethylenediamine.

## 9.28 Apple Juice Squeezed@2a

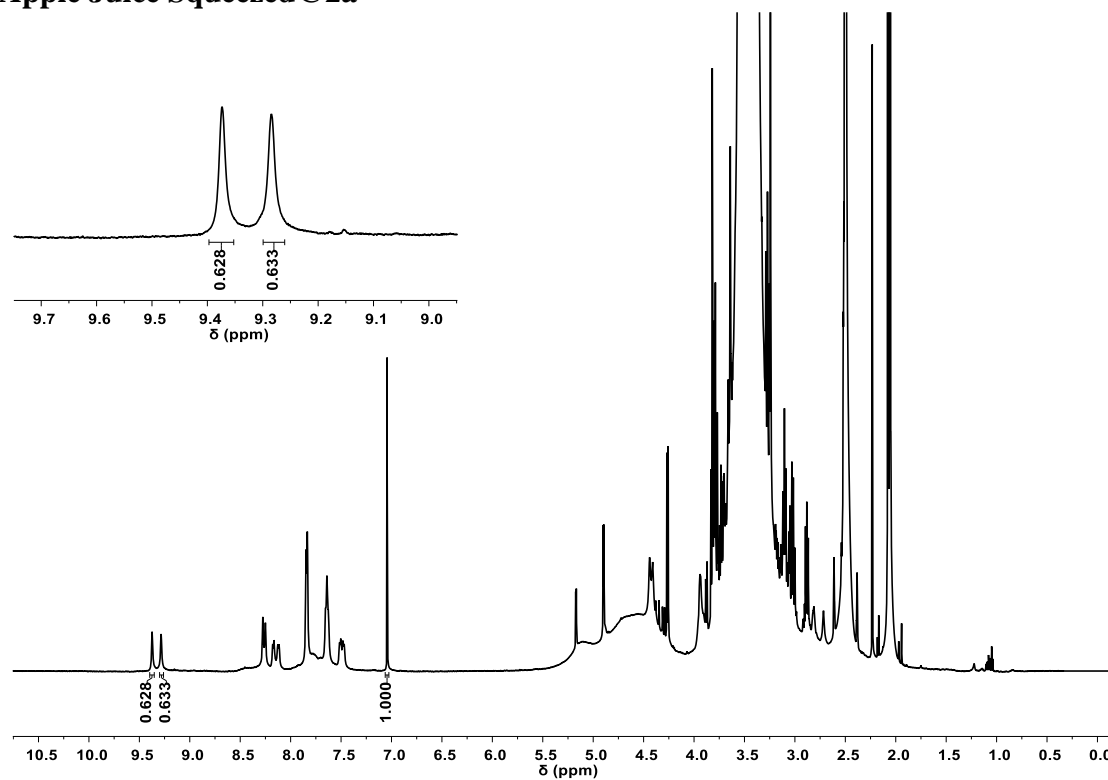

**Figure S57** <sup>1</sup>H-NMR spectrum (600 MHz, 301 K, DMSO-*d*<sub>6</sub>) of the system formed adding freshly squeezed Apple juice without pre-treatment to the DMSO-*d*<sub>6</sub> solution containing complex **1a** and ethylenediamine.

## 9.29 Pear Juice@2a

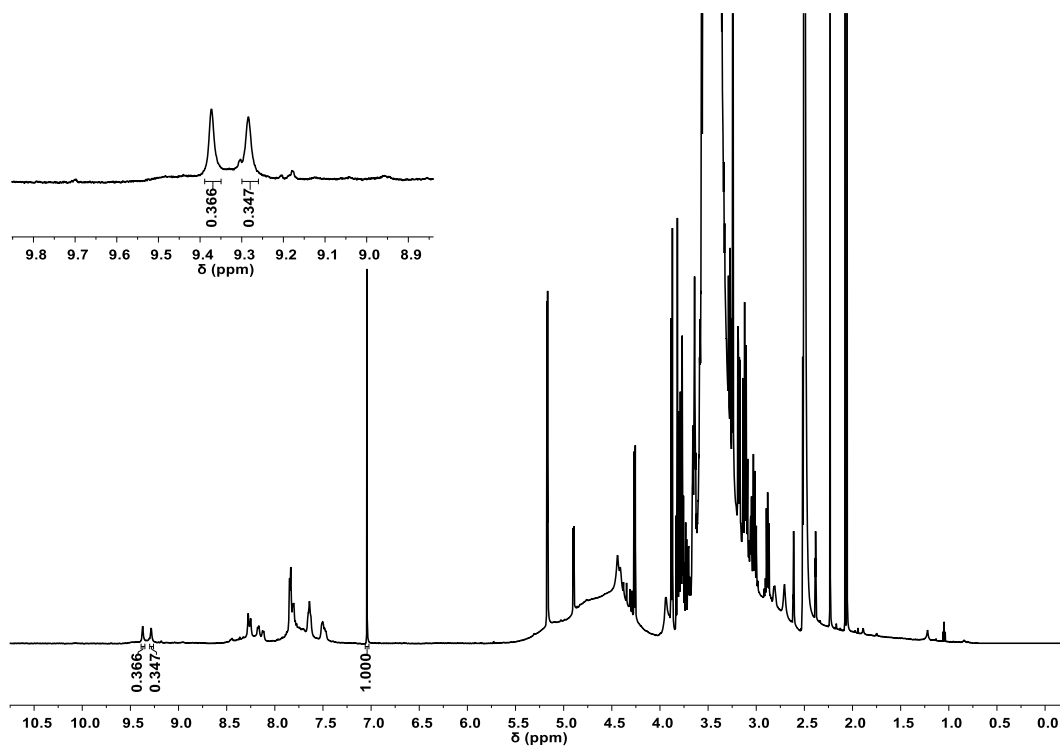

**Figure S58** <sup>1</sup>H-NMR spectrum (400 MHz, 301 K, DMSO-*d*<sub>6</sub>) of the system formed adding Pear juice without pre-treatment to the DMSO-*d*<sub>6</sub> solution containing complex **1a** and ethylenediamine.

## 9.30 Blueberry-Grape Juice@2a

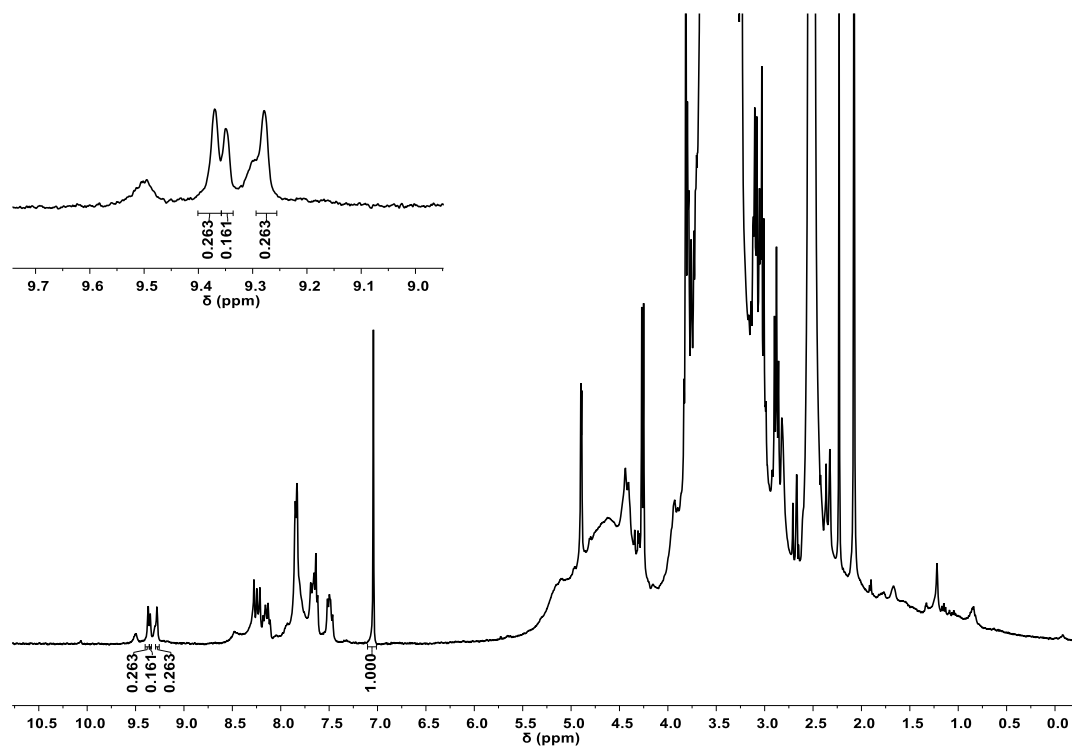

**Figure S59** <sup>1</sup>H-NMR spectrum (400 MHz, 301 K, DMSO-*d*<sub>6</sub>) of the system formed adding Blueberry-Grape juice without pre-treatment to the DMSO-*d*<sub>6</sub> solution containing complex **1a** and ethylenediamine.

### 9.31 Peach Juice@2a

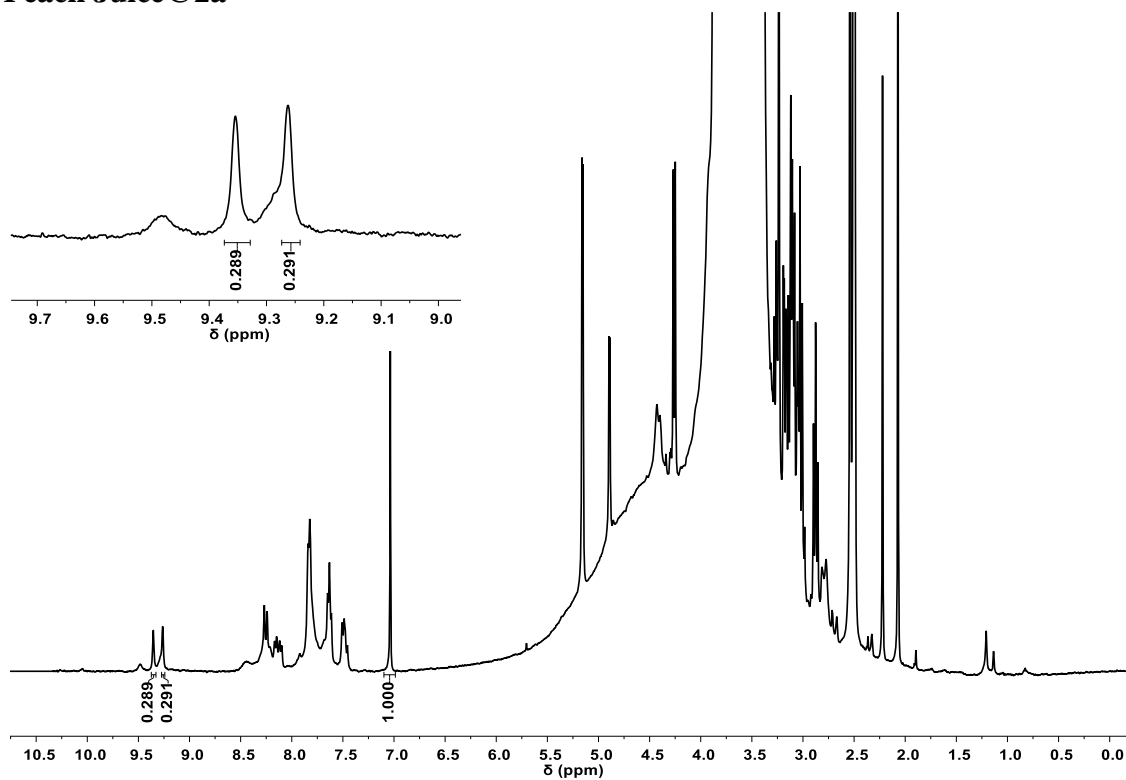

**Figure S60**  $^1\text{H-NMR}$  spectrum (400 MHz, 301 K, DMSO- $d_6$ ) of the system formed adding Peach juice without pre-treatment to the DMSO- $d_6$  solution containing complex **1a** and ethylenediamine.

### 9.32 Prosecco@(*R,R*)-2b

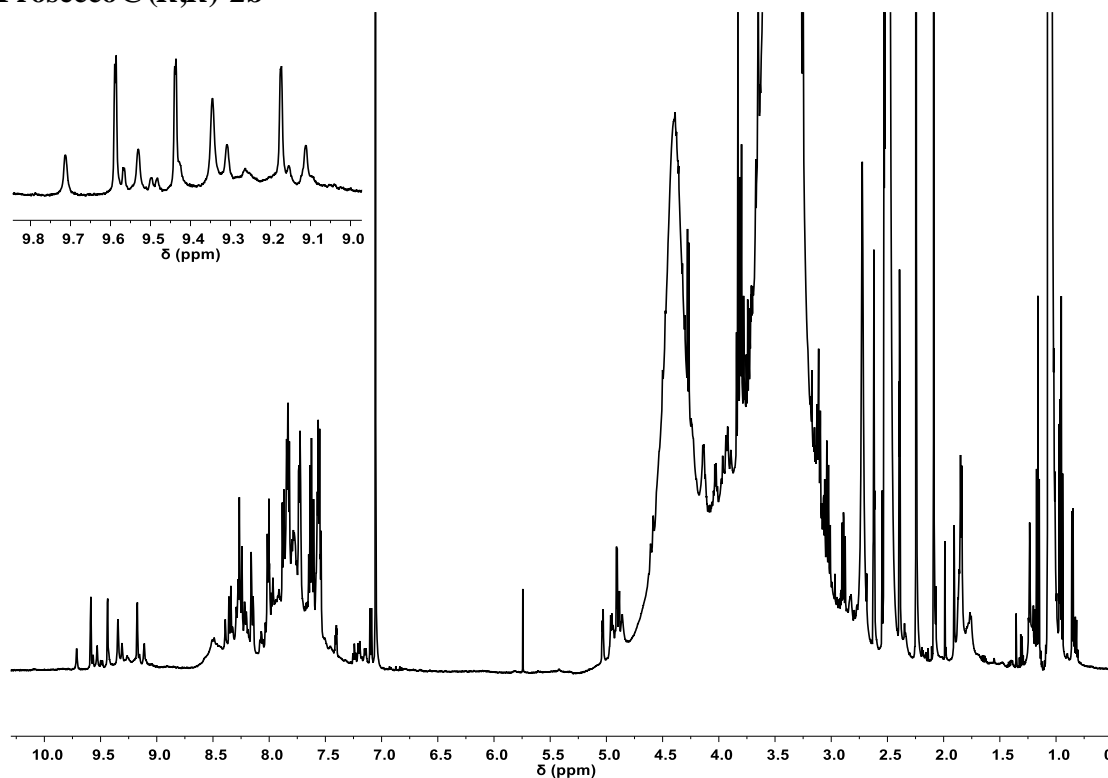

**Figure S61** <sup>1</sup>H-NMR spectrum (600 MHz, 301 K, DMSO-*d*<sub>6</sub>) of the system formed adding Prosecco Wine without pre-treatment to the DMSO-*d*<sub>6</sub> solution containing complex (***R***)-**1b** and ethylenediamine.

### 9.33 Chianti@(*R,R*)-2b

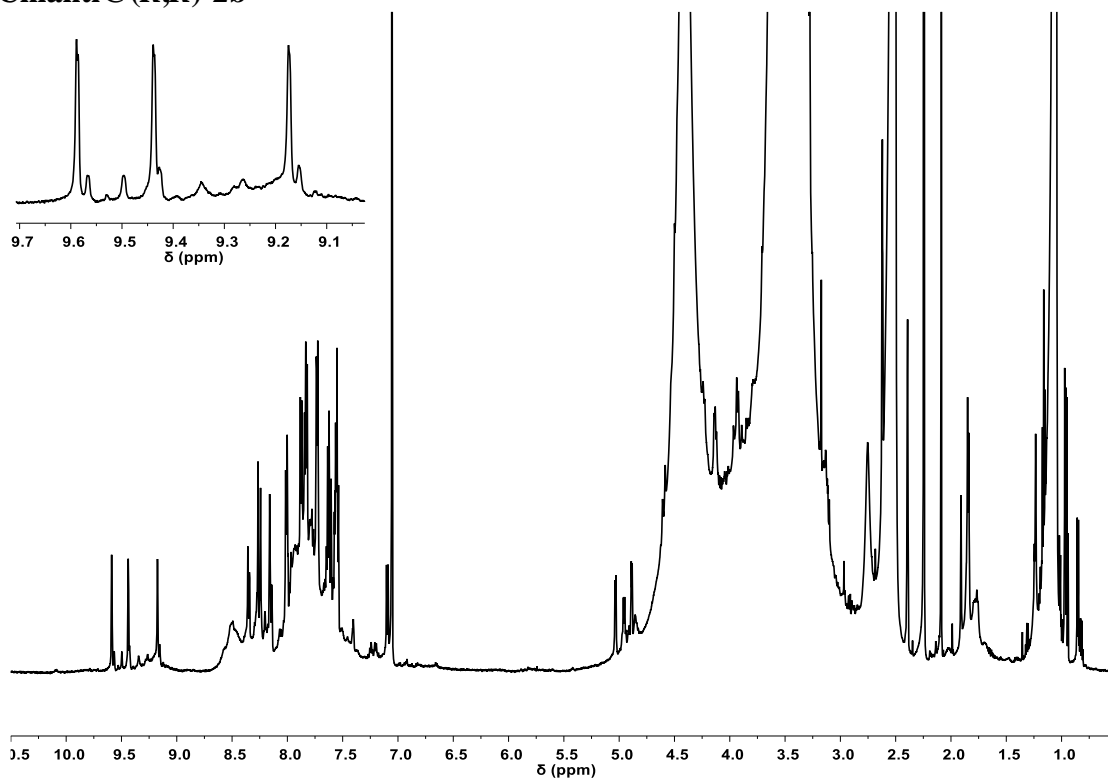

**Figure S62** <sup>1</sup>H-NMR spectrum (600 MHz, 301 K, DMSO-*d*<sub>6</sub>) of the system formed adding Chianti Wine without pre-treatment to the DMSO-*d*<sub>6</sub> solution containing complex (***R***)-**1b** and ethylenediamine.

### 9.34 Chardonnay@(*R,R*)-2b

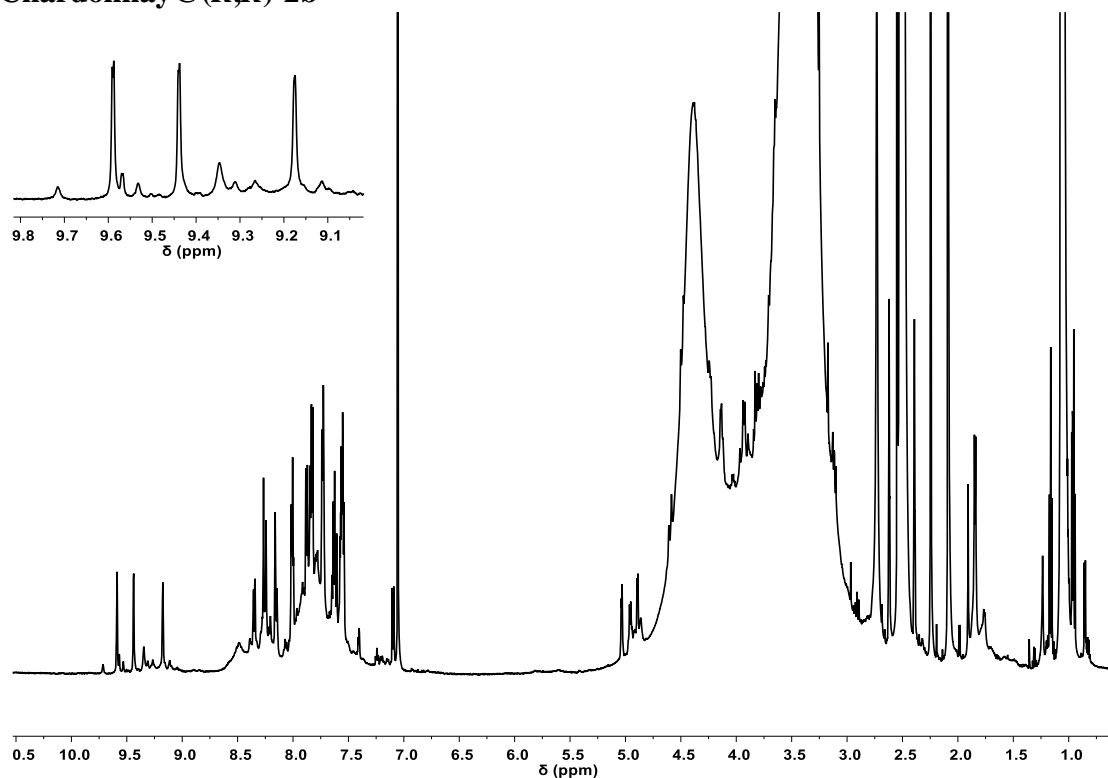

**Figure S63** <sup>1</sup>H-NMR spectrum (600 MHz, 301 K, DMSO-*d*<sub>6</sub>) of the system formed adding Chardonnay Wine without pre-treatment to the DMSO-*d*<sub>6</sub> solution containing complex (***R***)-**1b** and ethylenediamine.

### 9.35 Valpolicella@(*R,R*)-2b

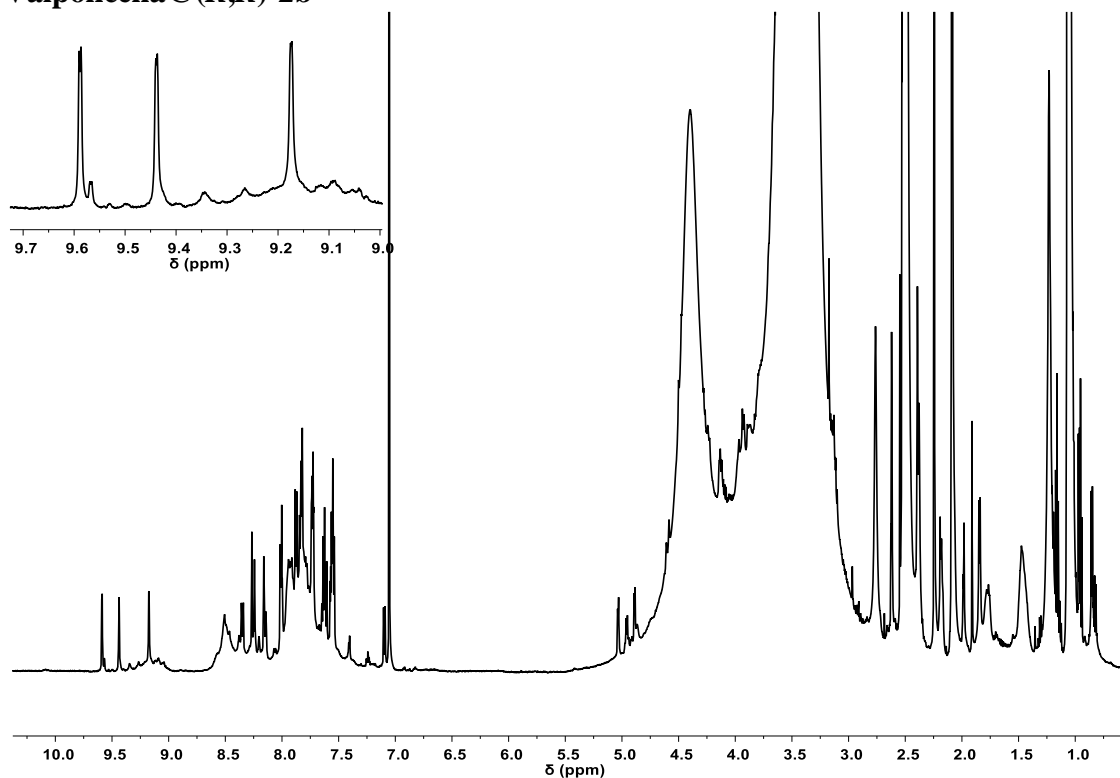

**Figure S64** <sup>1</sup>H-NMR spectrum (600 MHz, 301 K, DMSO-*d*<sub>6</sub>) of the system formed adding Valpolicella Wine without pre-treatment to the DMSO-*d*<sub>6</sub> solution containing complex (***R***)-**1b** and ethylenediamine.

### 9.36 Müller-Thurgau@(*R,R*)-2b

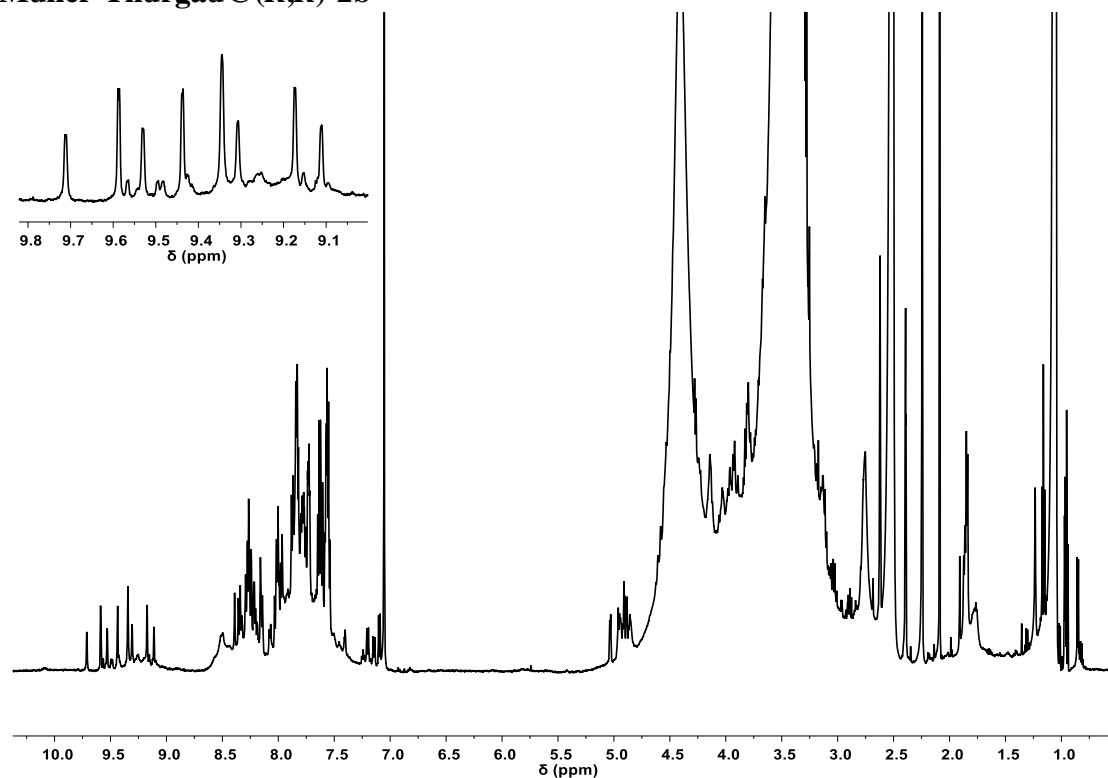

**Figure S65** <sup>1</sup>H-NMR spectrum (600 MHz, 301 K, DMSO-*d*<sub>6</sub>) of the system formed adding Müller-Thurgau Wine without pre-treatment to the DMSO-*d*<sub>6</sub> solution containing complex (**R**)-**1b** and ethylenediamine.

### 9.37 Barbera@(*R,R*)-2b

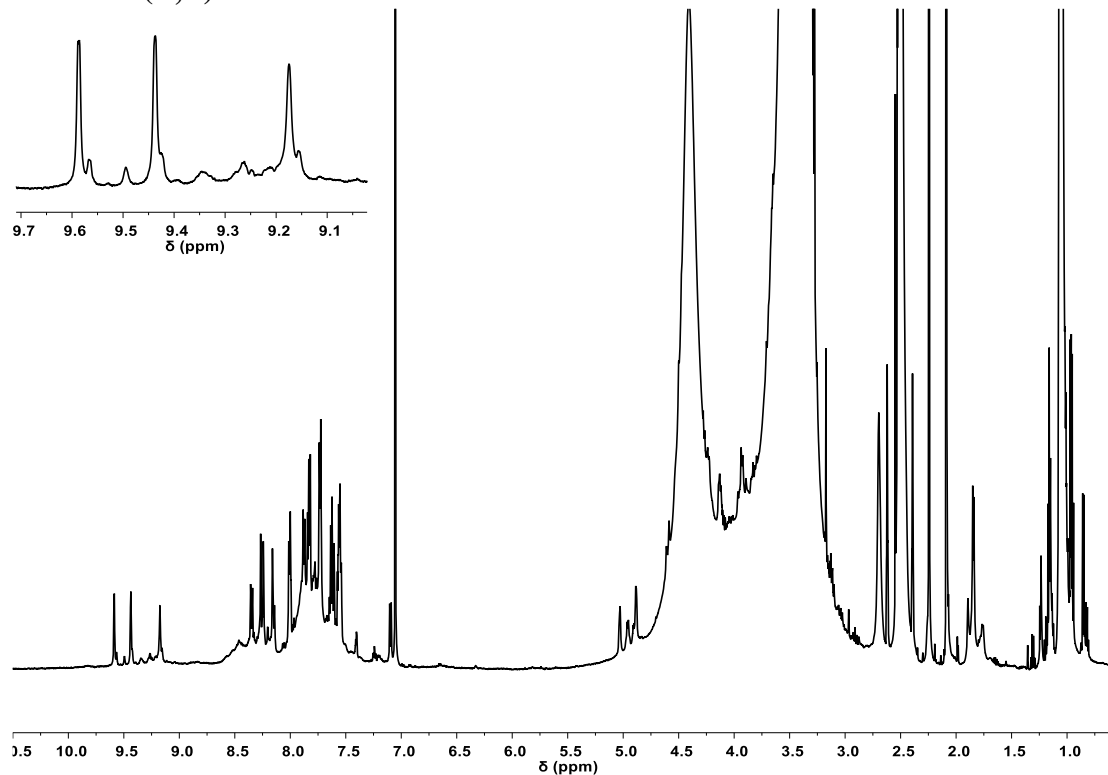

**Figure S66** <sup>1</sup>H-NMR spectrum (600 MHz, 301 K, DMSO-*d*<sub>6</sub>) of the system formed adding Barbera Wine without pre-treatment to the DMSO-*d*<sub>6</sub> solution containing complex (**R**)-**1b** and ethylenediamine.

### 9.38 Blueberry Juice Alcenera@(*R,R*)-2b

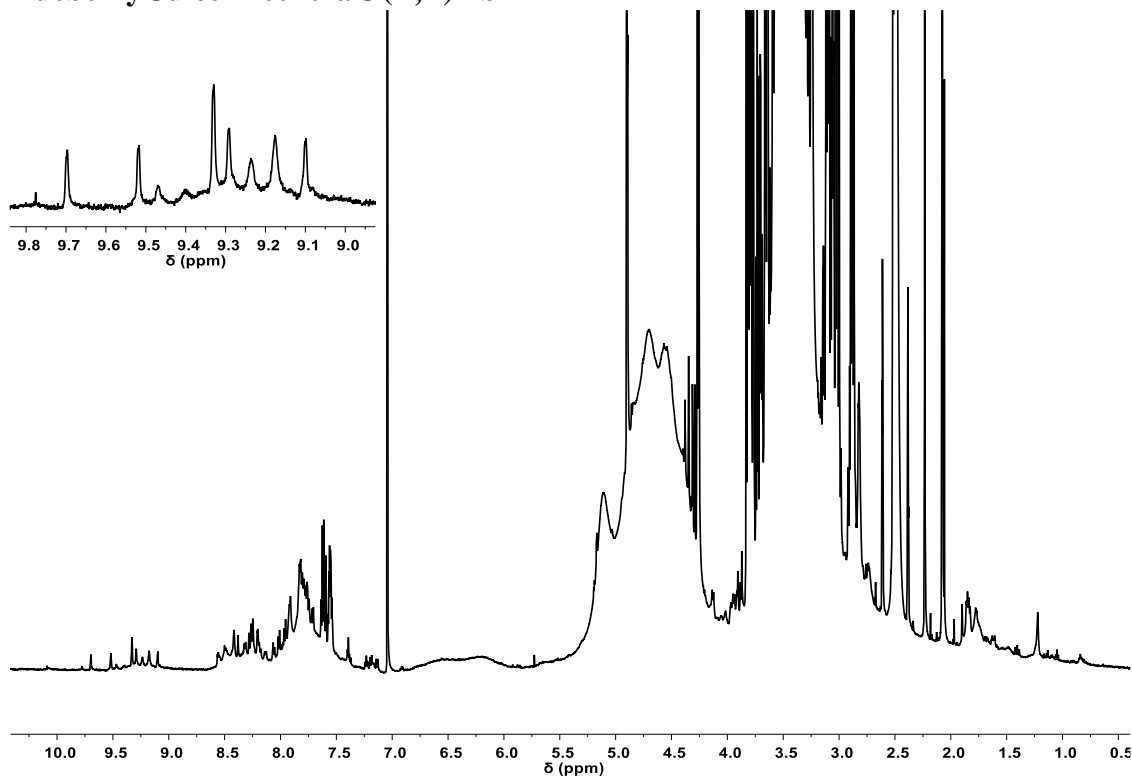

**Figure S67** <sup>1</sup>H-NMR spectrum (600 MHz, 301 K, DMSO-*d*<sub>6</sub>) of the system formed adding Blueberry Juice without pre-treatment to the DMSO-*d*<sub>6</sub> solution containing complex (***R***)-**1b** and ethylenediamine.

### 9.39 Blueberry Juice Zuegg@(*R,R*)-2b

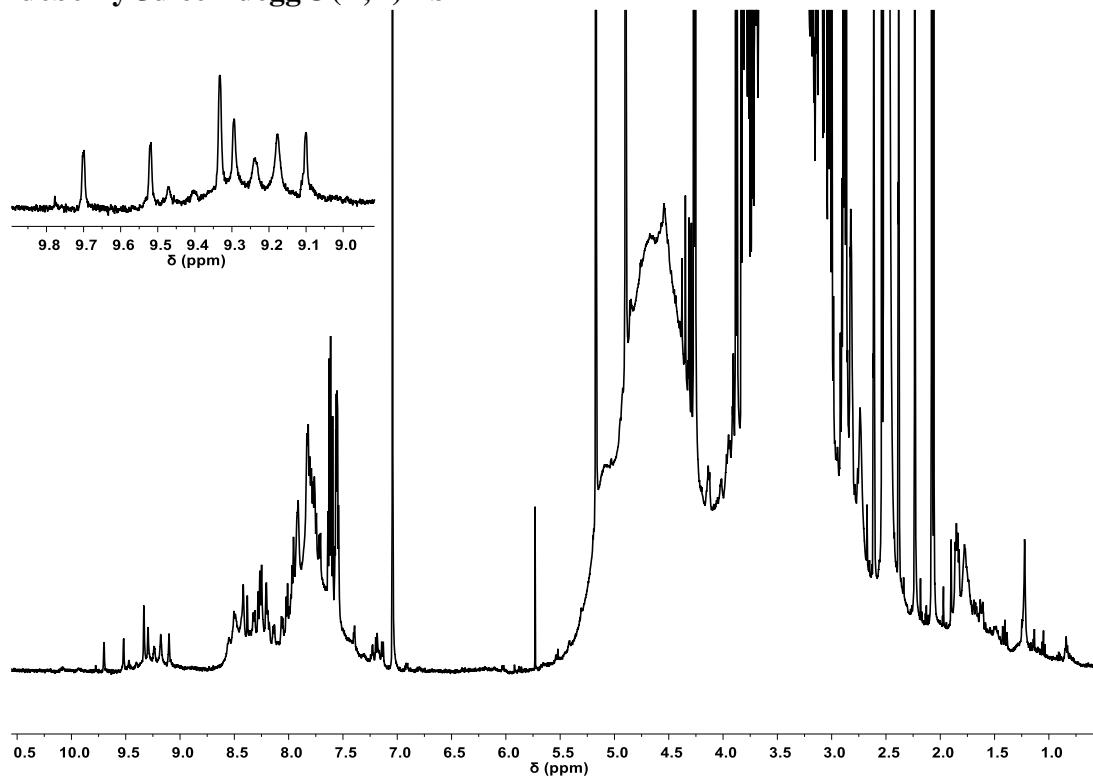

**Figure S68** <sup>1</sup>H-NMR spectrum (600 MHz, 301 K, DMSO-*d*<sub>6</sub>) of the system formed adding Blueberry Juice without pre-treatment to the DMSO-*d*<sub>6</sub> solution containing complex (***R***)-**1b** and ethylenediamine.



#### 9.40 Blueberry Juice Squeezed@(*R,R*)-2b

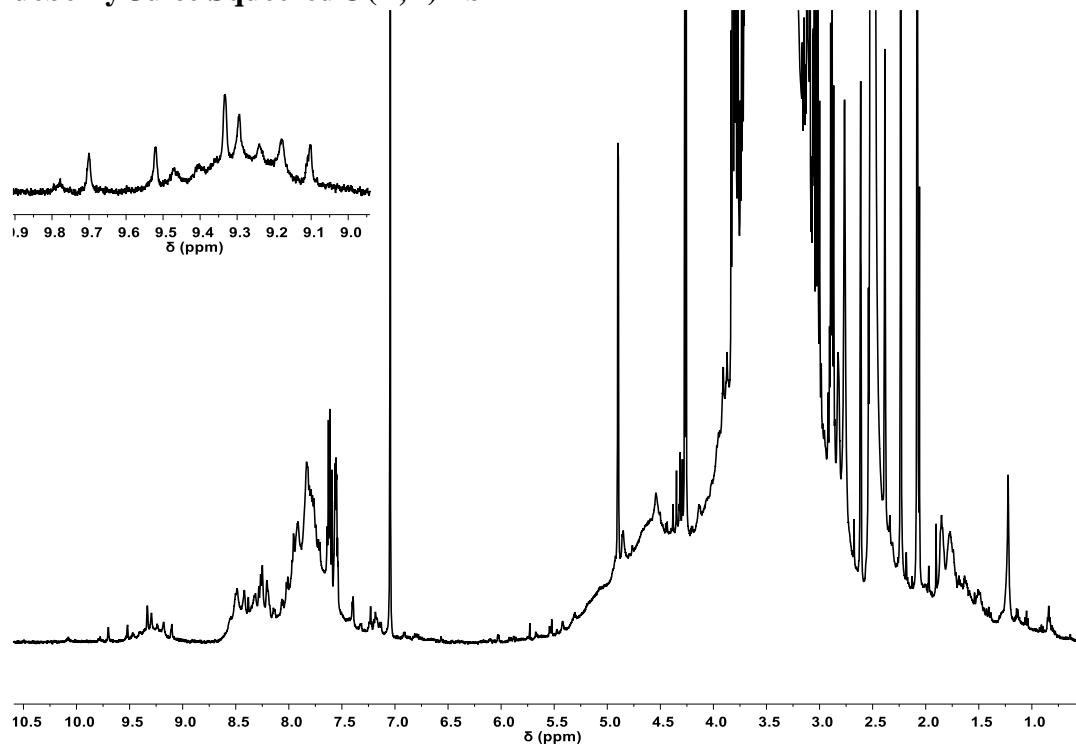

**Figure S69**  $^1\text{H-NMR}$  spectrum (600 MHz, 301 K,  $\text{DMSO-}d_6$ ) of the system formed adding freshly squeezed Blueberry Juice without pre-treatment to the  $\text{DMSO-}d_6$  solution containing complex (***R***)-**1b** and ethylenediamine.

#### 9.41 Apple Juice@(*R,R*)-2b

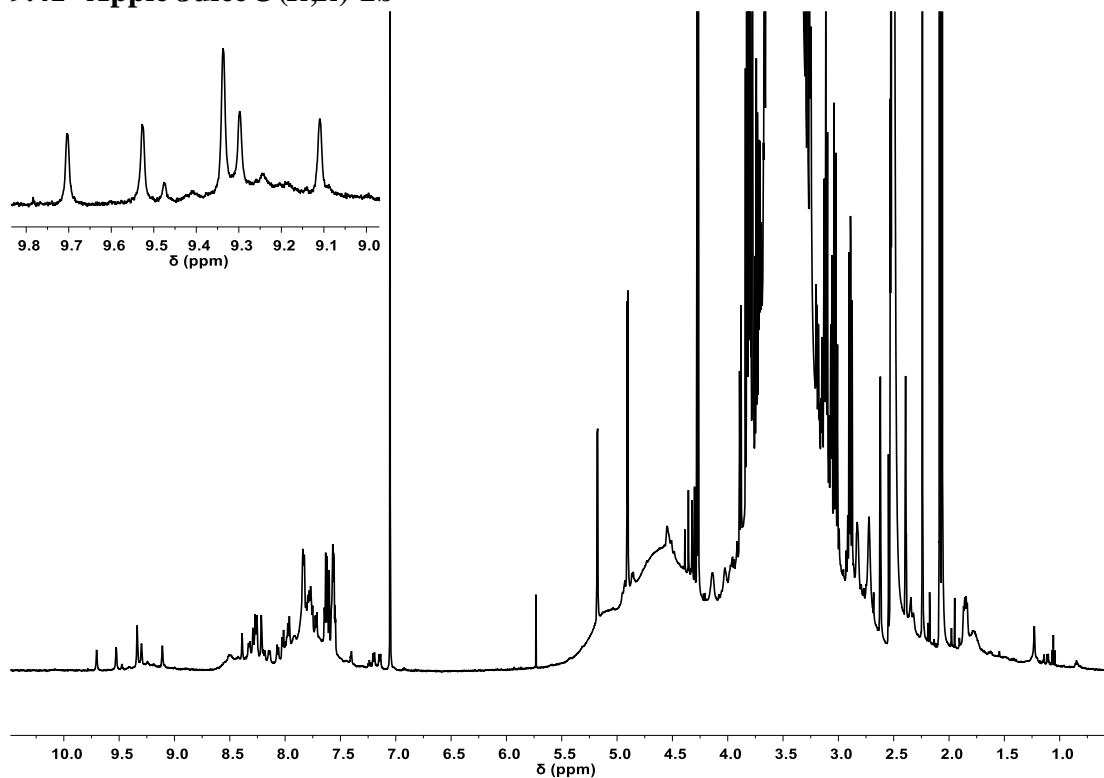

**Figure S70**  $^1\text{H-NMR}$  spectrum (600 MHz, 301 K,  $\text{DMSO-}d_6$ ) of the system formed adding Apple Juice without pre-treatment to the  $\text{DMSO-}d_6$  solution containing complex (***R***)-**1b** and ethylenediamine.

### 9.42 Apple Squeezed@(*R,R*)-2b

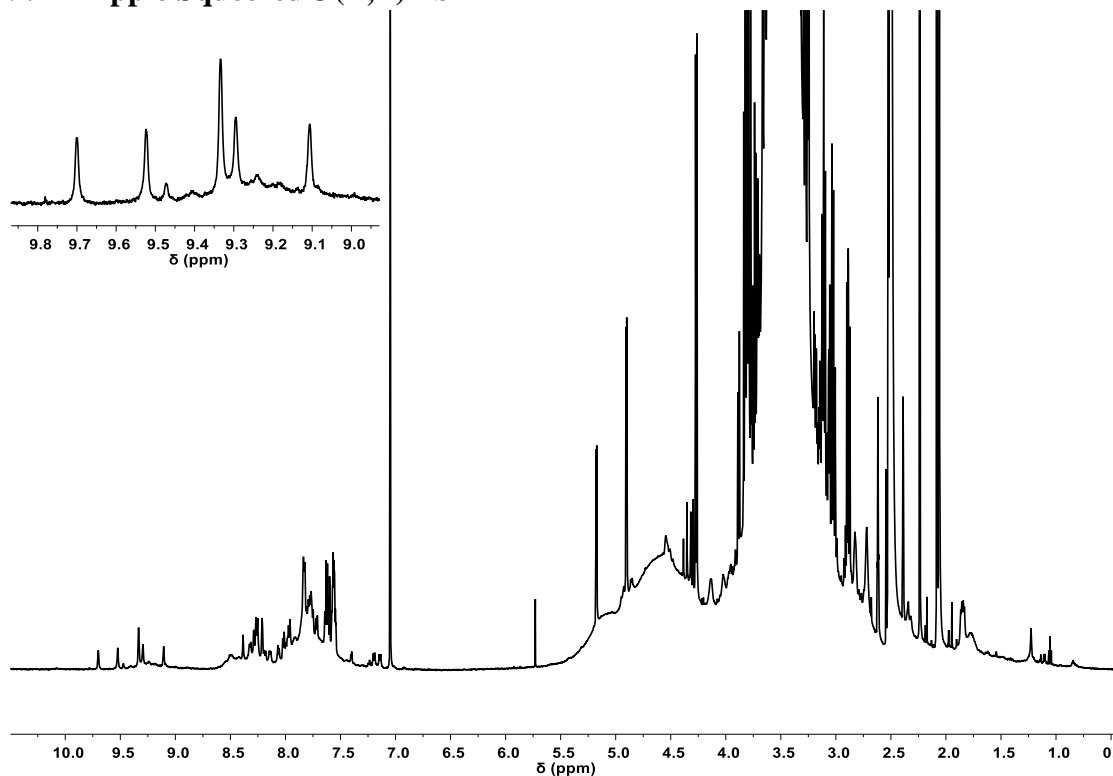

**Figure S71** <sup>1</sup>H-NMR spectrum (600 MHz, 301 K, DMSO-*d*<sub>6</sub>) of the system formed adding freshly squeezed Apple Juice without pre-treatment to the DMSO-*d*<sub>6</sub> solution containing complex (*R*)-**1b** and ethylenediamine.

### 9.43 Pear Juice@(*R,R*)-2b

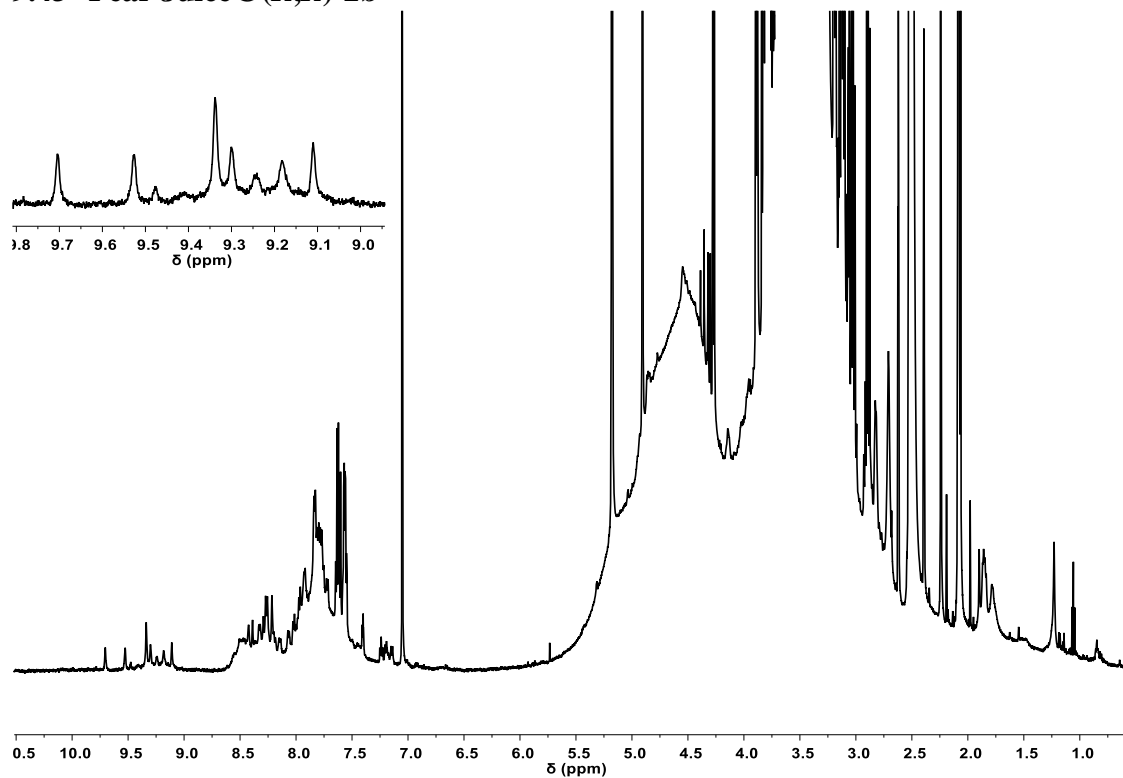

**Figure S72** <sup>1</sup>H-NMR spectrum (600 MHz, 301 K, DMSO-*d*<sub>6</sub>) of the system formed adding Pear Juice without pre-treatment to the DMSO-*d*<sub>6</sub> solution containing complex **1b** and ethylenediamine.

## 10 Quantification of Dicarboxylic acids Content in Complex mixtures

In order to determine the concentration of Tartaric, Malic, and Succinic acids in the complex mixtures, the concentration of cages **L-Tar@2a**, **L-Mal@2a**, and **L-Suc@2a** has been determined using p-xylene as internal standard.

**Table S1.** Quantification of Tartaric, Malic, and Succinic acids content in the complex mixtures.

| Complex Mixture          | Tartaric Acid (g/L) | Malic Acid (g/L) | Succinic Acid (g/L) |
|--------------------------|---------------------|------------------|---------------------|
| Prosecco                 | 1.3                 | 1.6              | 0.3                 |
| Chianti                  | 2.4                 | n.d              | 0.7                 |
| Chardonnay               | 1.5                 | 1.6              | 0.2                 |
| Valpolicella             | 2.0                 | 0.3              | 0.7                 |
| Müller-Thurgau           | 1.5                 | 1.7              | 0.5                 |
| Barbera                  | 2.5                 | n.d              | 0.5                 |
| Grapes Juice Squeezed    | 3.6                 | n.d              | n.d                 |
| Blueberry Alcenera       | n.d                 | 1.4              | n.d*                |
| Blueberry Zuegg          | n.d                 | 2.5              | n.d*                |
| Blueberry Juice Squeezed | n.d                 | 2.1              | n.d*                |
| Apple Juice              | n.d                 | 4.7              | n.d                 |
| Apple Juice Squeezed     | n.d                 | 3.9              | n.d                 |
| Pear Juice               | n.d                 | 2.1              | n.d                 |
| Blueberry-Grape Juice    | 0.5                 | 1.6              | n.d*                |
| Peach Juice              | n.d                 | 1.8              | n.d*                |

\*The peak of succinic acid could be overlapped to the citric acid peak at 9.33 ppm

## 11 Chromatographic Analysis

In order to verify the reliability of the quantification of Tartaric, Malic, and Succinic acids *via*  $^1\text{H-NMR}$  using the supramolecular cage **2a** as probe, a chromatographic analysis has been performed.

The HPLC method parameters have been reported in Table S2.

**Table S2.** HPLC Method Parameters.

| HPLC Method Parameters |                                                        |
|------------------------|--------------------------------------------------------|
| Column                 | Eurospher II 100-5 C18, 5 $\mu\text{m}$ , 4.6 x 250 mm |
| Mobile Phase           | Isocratic, 25 mM K-phosphate buffer; pH 2.4            |
| Flow Rate              | 1.5 mL/min. (~ 2600 psi)                               |
| Oven Temp.             | 30 $^\circ\text{C}$                                    |
| UV detection           | Wavelength: 210 nm                                     |
| Injection Volume       | 20 $\mu\text{L}$                                       |

The Chromatogram of the mixtures of the three dicarboxylic acids is reported in Fig. S73.

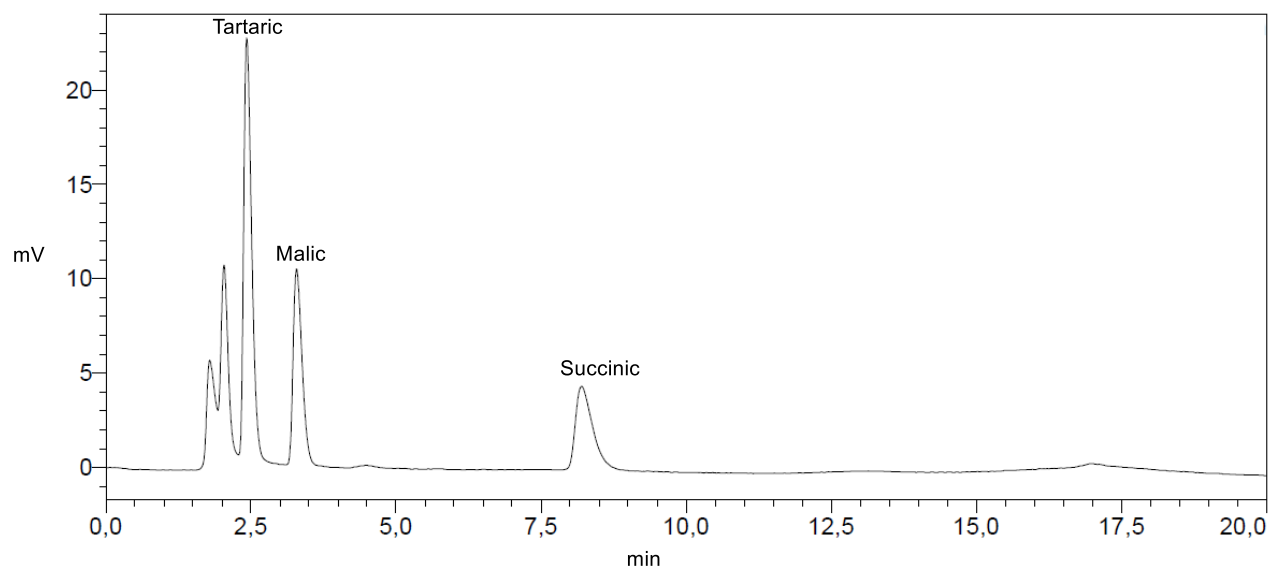

**Figure S73:** Chromatogram of the mixture of Tartaric (ret. time 2.43 min), Malic (ret. time 3.29 min), and Succinic (ret. time 8.20 min) acids.

For calibration purposes, five solutions with different concentrations (ranging from 20 to 1000 ppm) have been prepared for Tartaric, Malic, and Succinic acids (Fig. S74-S76).

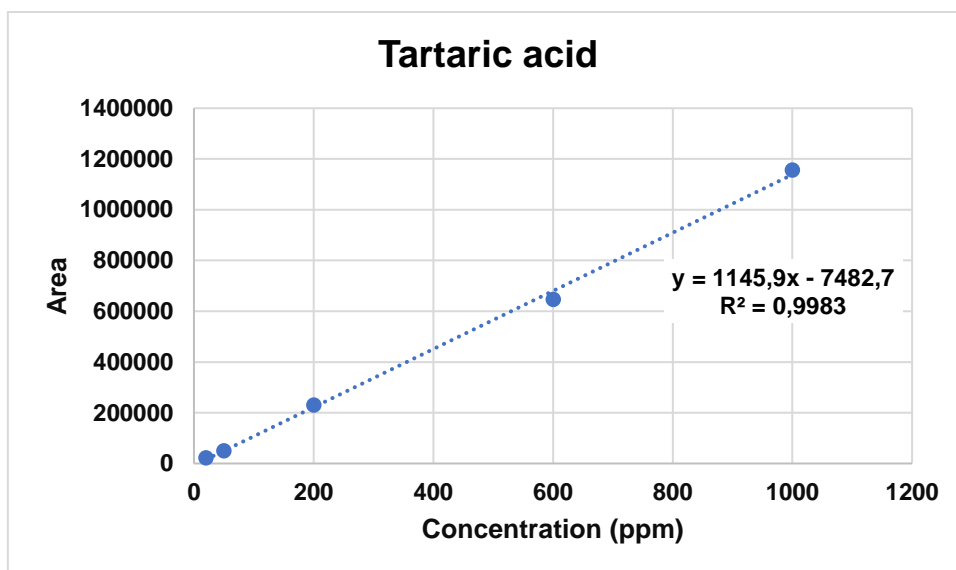

Fig S74 Calibration curve for Tartaric acid.

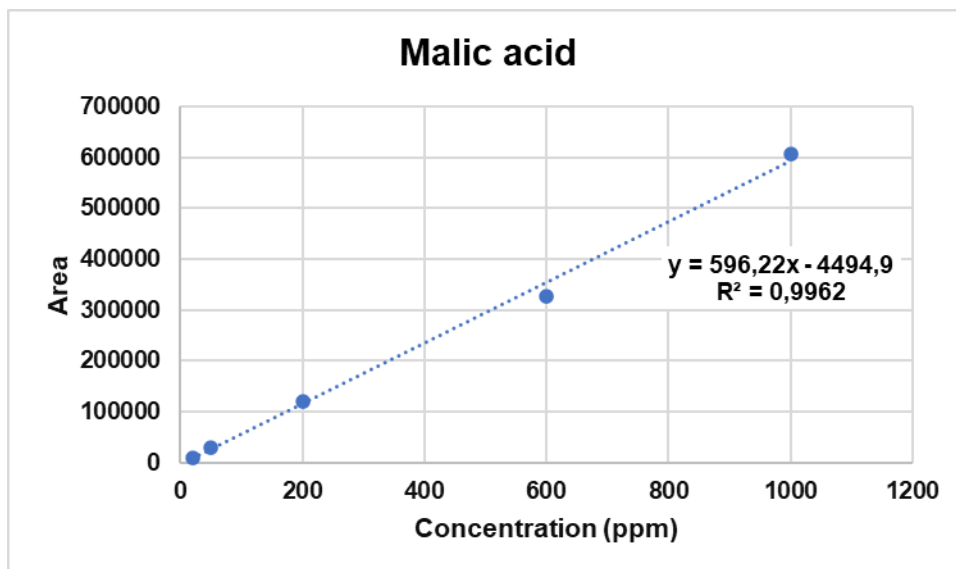

Fig S75 Calibration curve for Malic acid.

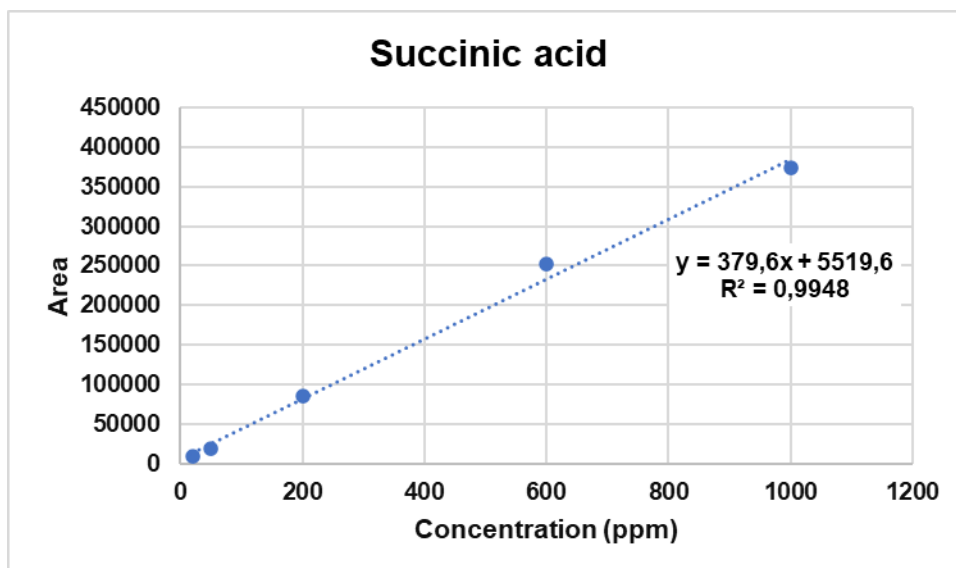

**Fig S76** Calibration curve for Succinic acid.

Commercial red wine (Valpolicella), white wine (Müller-Thurgau), and apple juice have been diluted 5:1 with HPLC-grade water, filtered and then injected.

The three chromatograms are reported in Figure S77.

**a)**

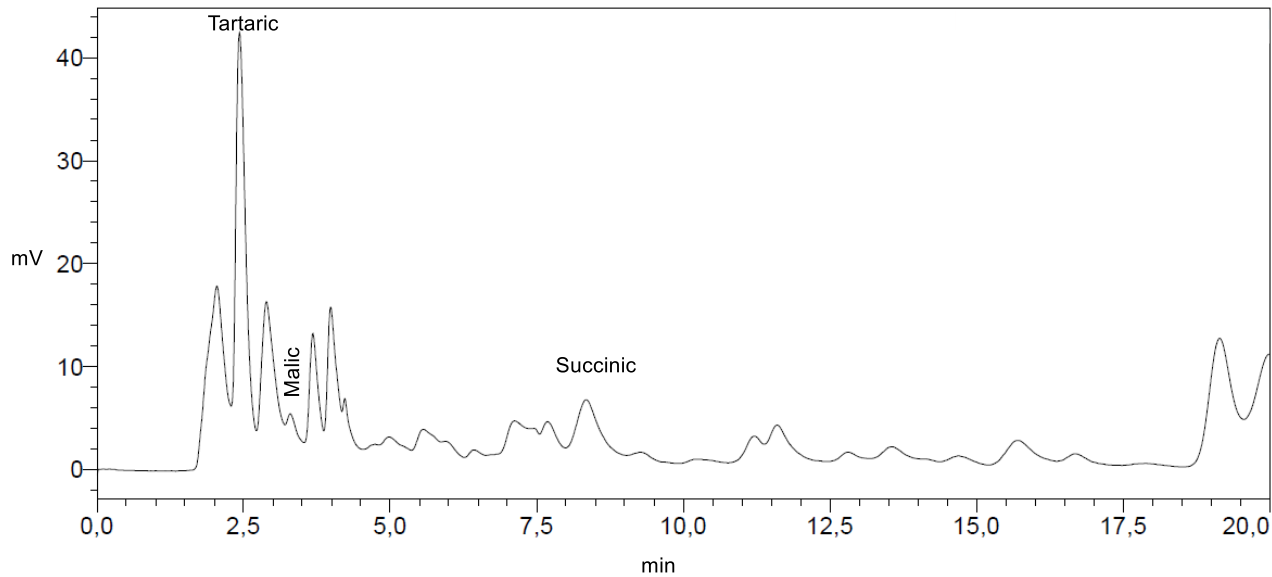

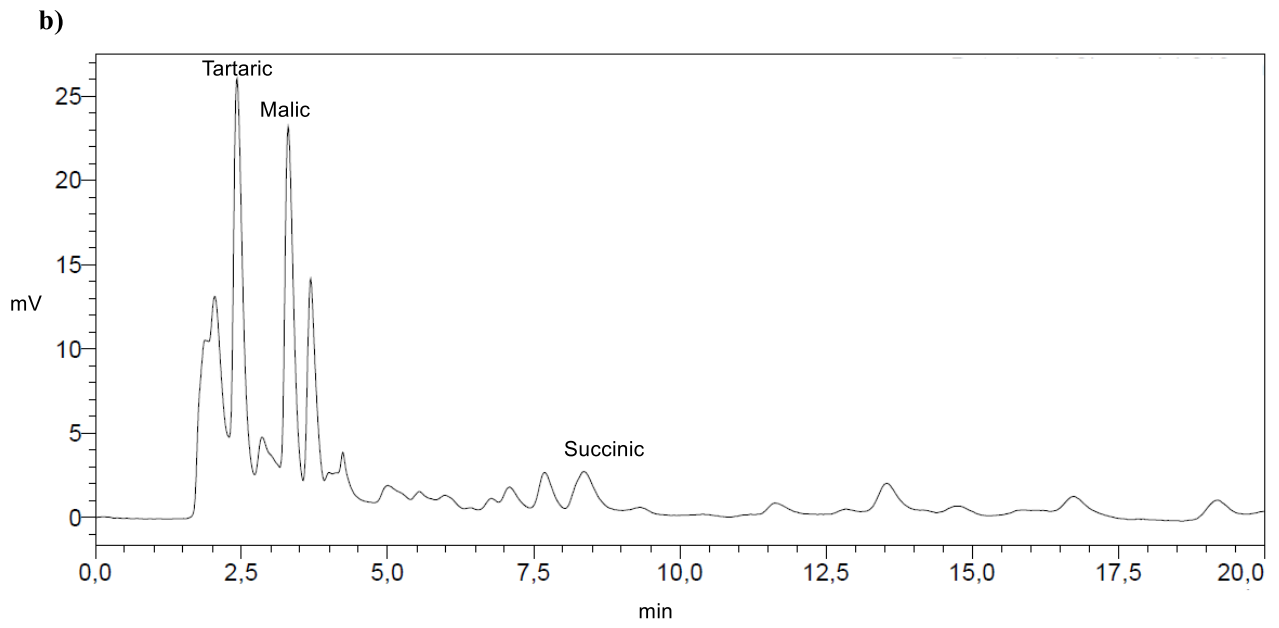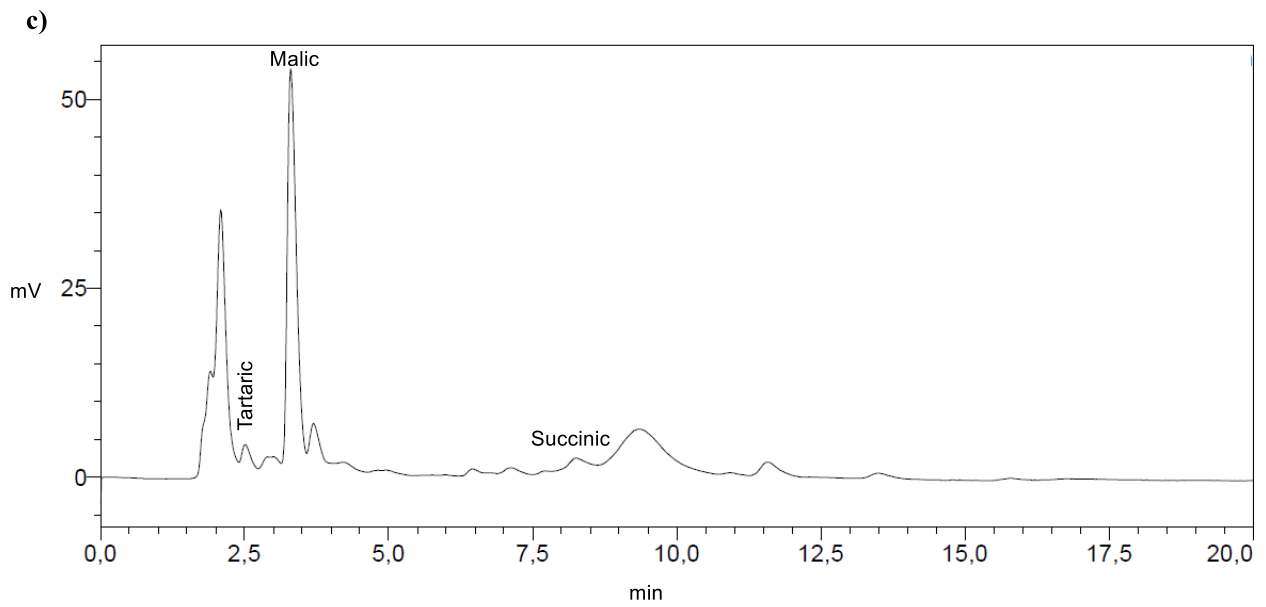

**Figure S77** Chromatogram of a) Valpolicella wine, b) Müller-Thurgau wine, and c) apple juice.

As reported in Table S3 a good agreement between the two measurements has been found.

**Table S3.** Quantification of Tartaric, Malic, and Succinic acids content in the complex mixtures with HPLC and *via*  $^1\text{H-NMR}$  using cage **2a** as probe.

| <b>Complex Mixtures</b>    |          | <b>HPLC<br/>(g/L)</b> | <b><math>^1\text{H-NMR}</math><br/>(g/L)</b> |
|----------------------------|----------|-----------------------|----------------------------------------------|
|                            |          |                       |                                              |
| <b>Valpolicella Wine</b>   | Tartaric | 1.8                   | 2.0                                          |
|                            | Malic    | 0.2                   | 0.3                                          |
|                            | Succinic | 0.9                   | 0.7                                          |
|                            |          |                       |                                              |
| <b>Müller-Thurgau Wine</b> | Tartaric |                       | 1.5                                          |
|                            | Malic    | 1.7                   | 1.7                                          |
|                            | Succinic | 0.6                   | 0.5                                          |
|                            |          |                       |                                              |
| <b>Apple Juice</b>         | Tartaric | 0.1                   | n.d.*                                        |
|                            | Malic    | 4.6                   | 4.7                                          |
|                            | Succinic | 0.1                   | n.d.*                                        |

\* In the case of apple juice tartaric and succinic acids were not observed in the  $^1\text{H-NMR}$  spectrum (Fig S56). This could be probably due to the fact that the concentration of malic acid is such high that the cage is completely saturated by malic acid.



## 12 ESI-MS Characterization

### 12.1 ESI-MS spectrum of 4

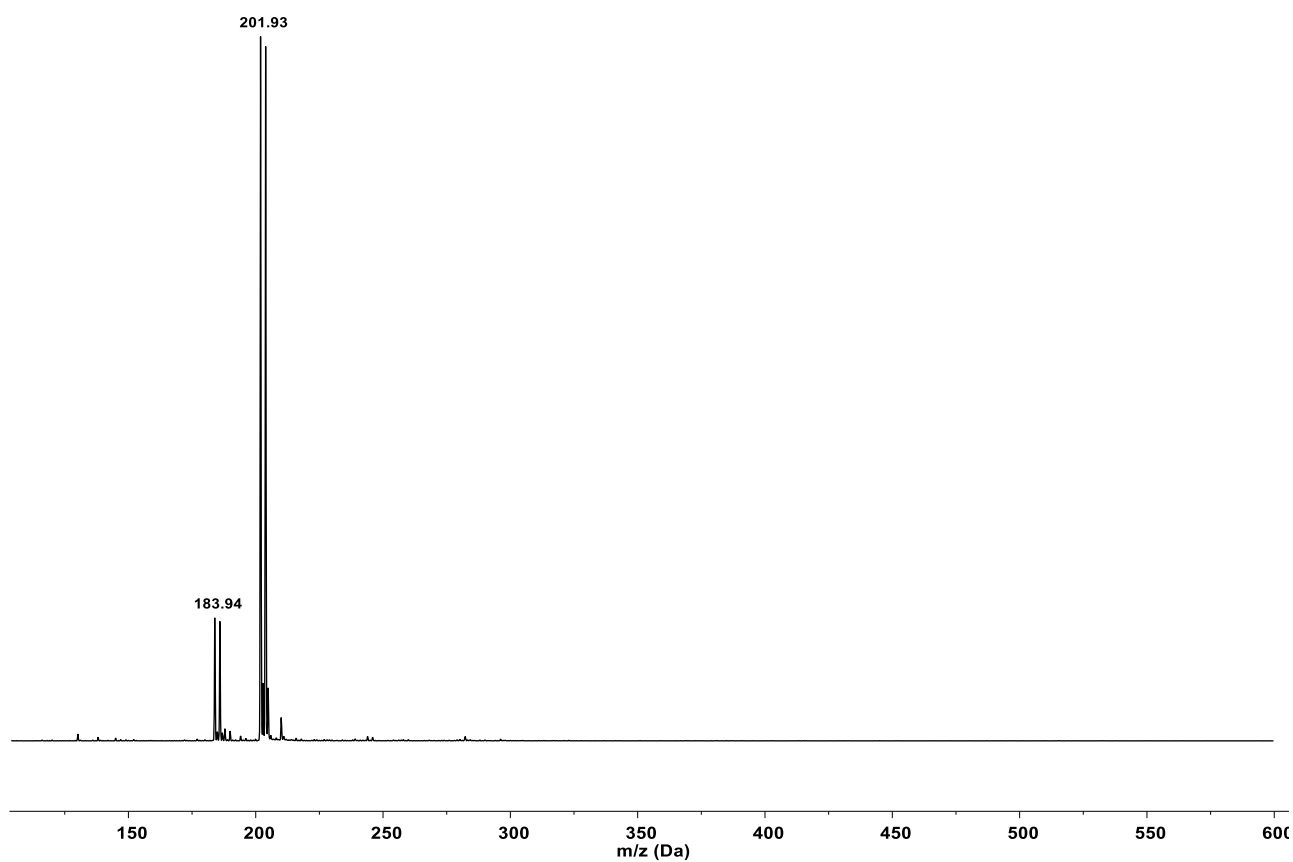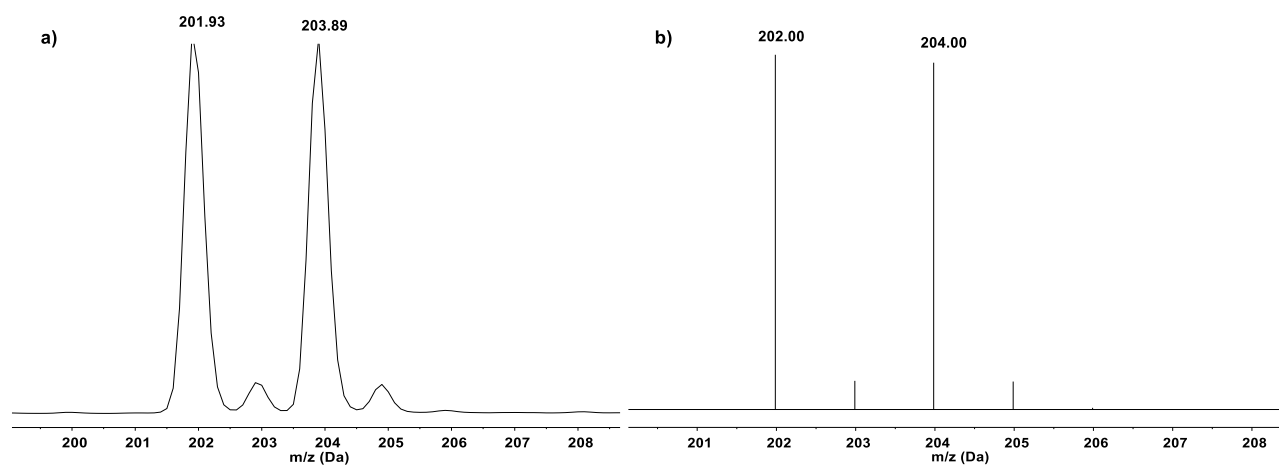

**Figure S78** a) Experimental, and b) calculated ESI-MS pattern of **4** for  $[M+H]^+$  adducts in  $CH_3CN/0.1\%$   $HCOOH$ .

## 12.2 ESI-MS spectrum of 5

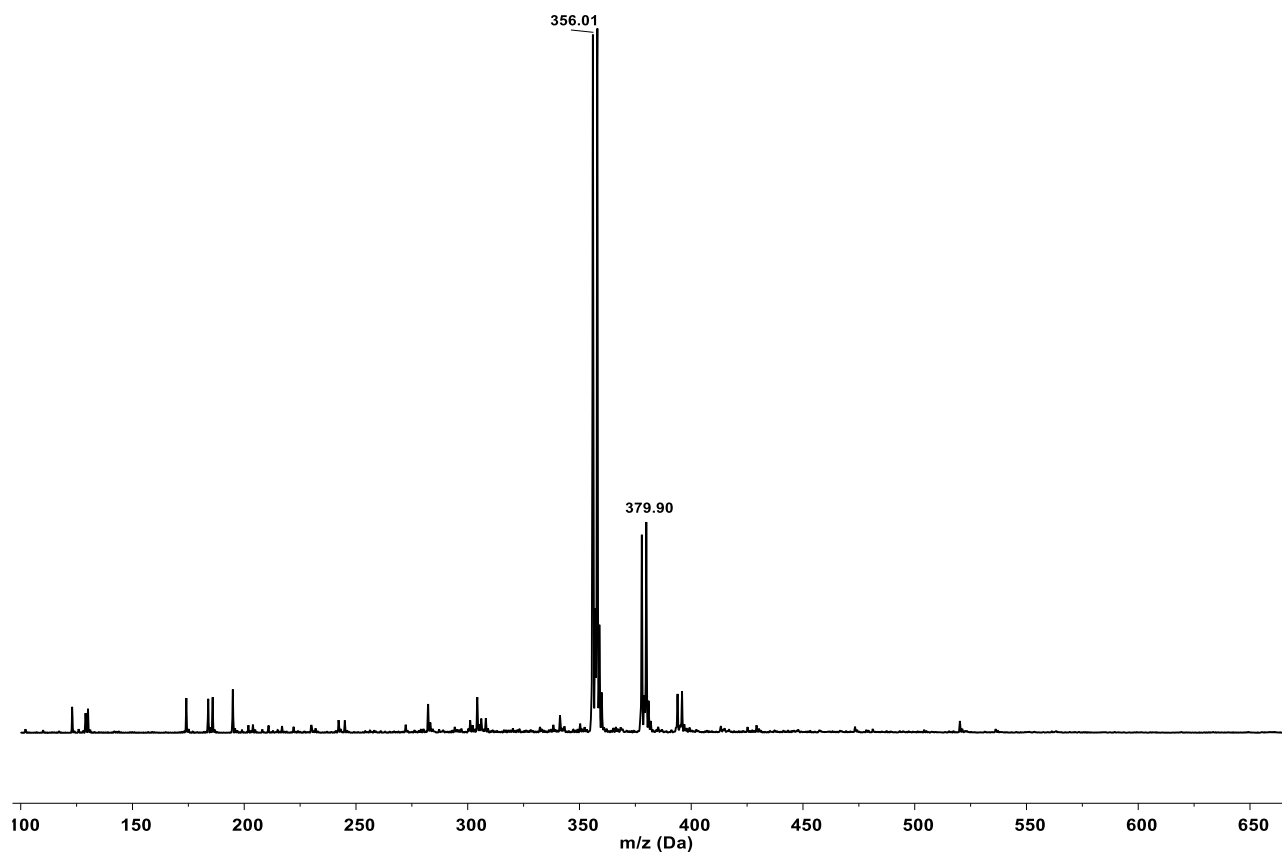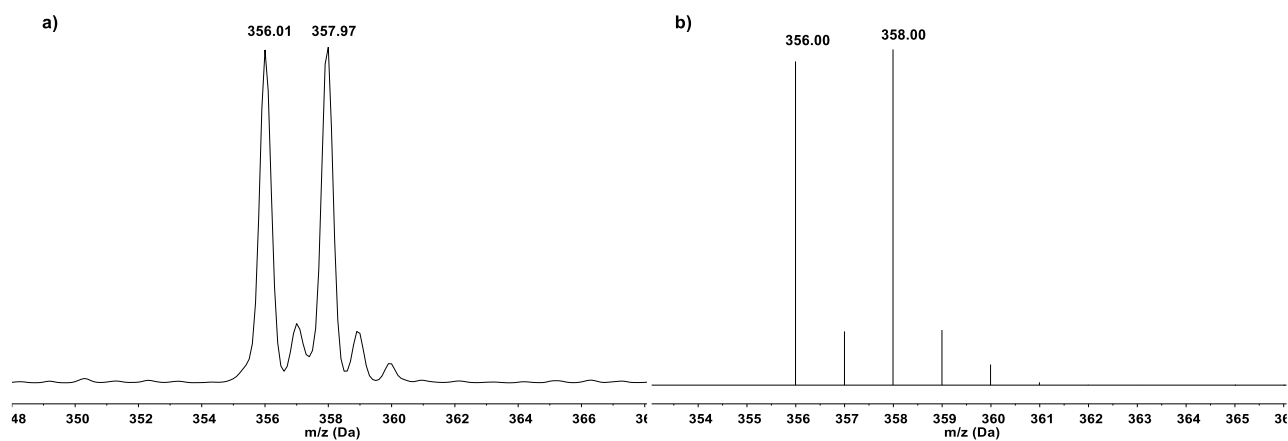

**Figure S79** a) Experimental, and b) calculated ESI-MS pattern of **5** for [M+H]<sup>+</sup> adducts in CH<sub>3</sub>CN/0.1% HCOOH.

### 12.3 ESI-MS spectrum of 6

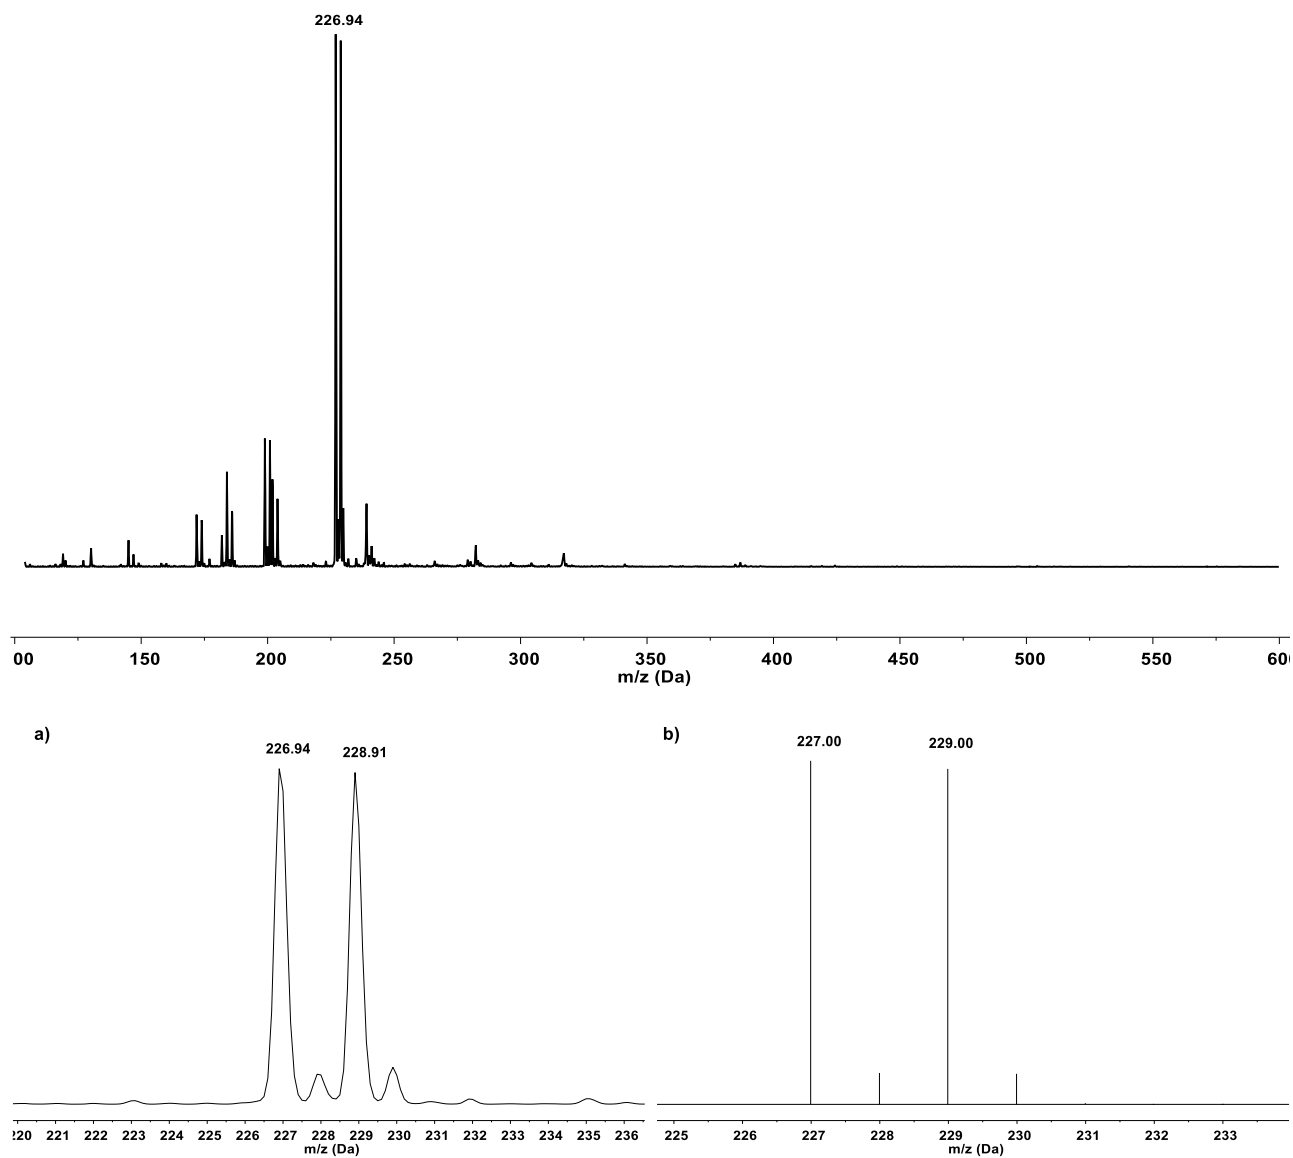

**Figure S80** a) Experimental, and b) calculated ESI-MS pattern of **6** for  $[M+H]^+$  adducts in  $CH_3CN/0.1\%$   $HCOOH$ .

## 12.4 ESI-MS spectrum of 7

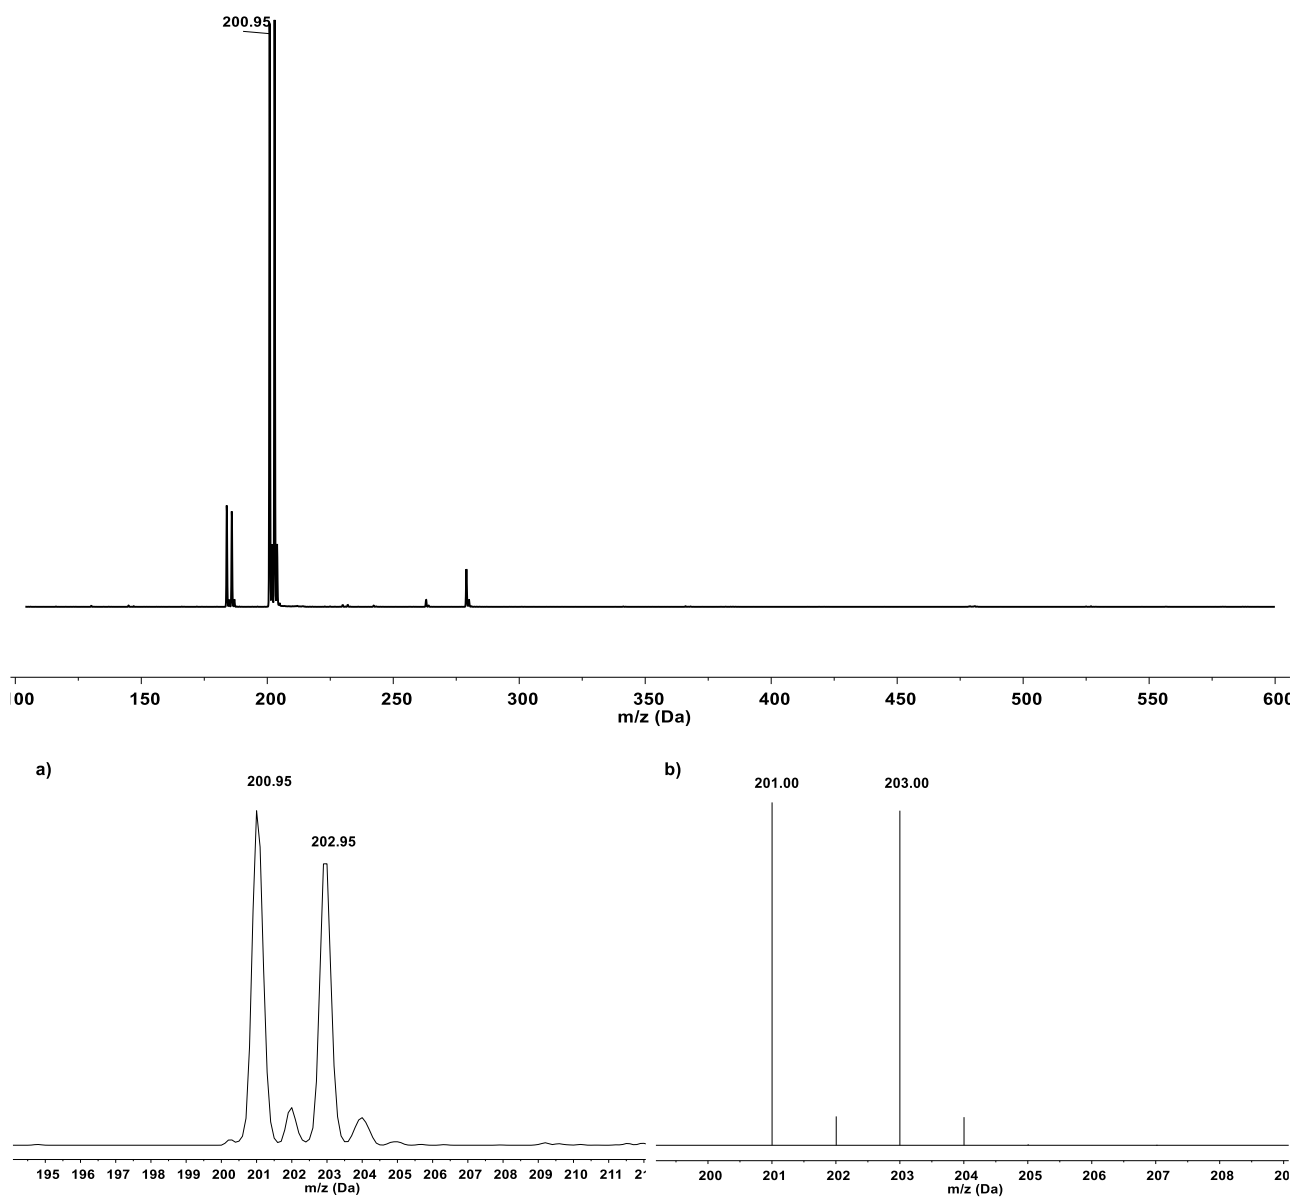

**Figure S81** a) Experimental, and b) calculated ESI-MS pattern of **7** for  $[M+H]^+$  adducts in  $\text{CH}_3\text{CN}/0.1\%$   $\text{HCOOH}$ .

## 12.5 ESI-MS spectrum of (*R*)-8

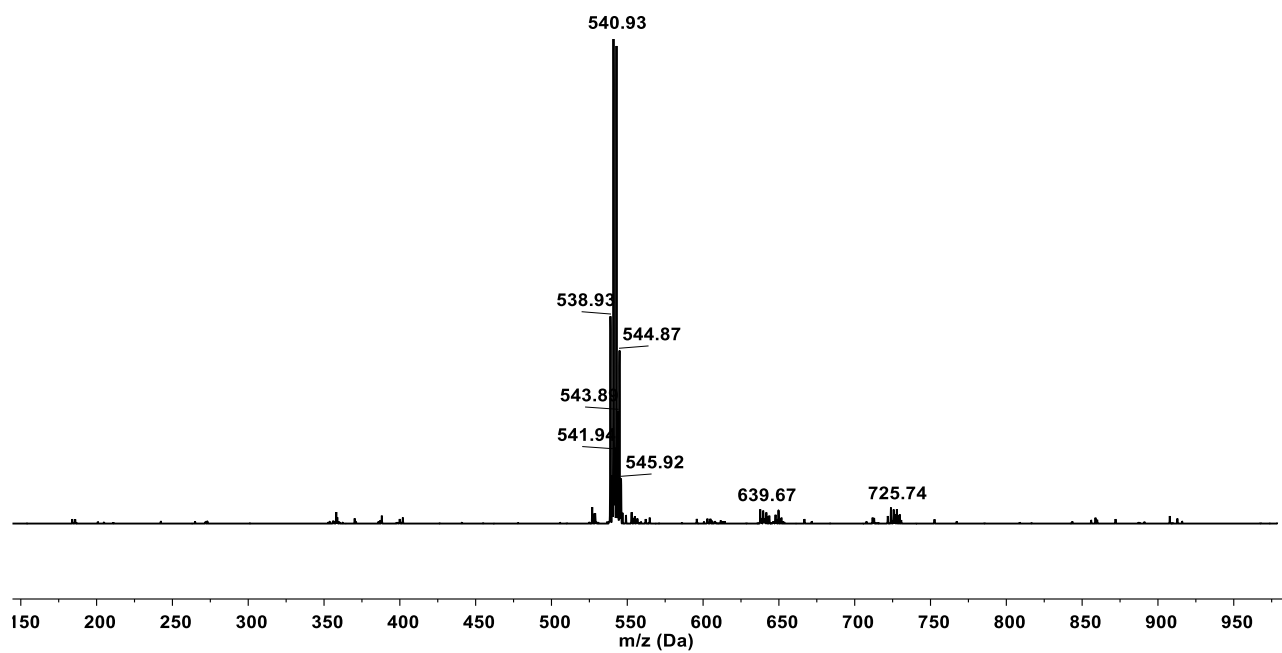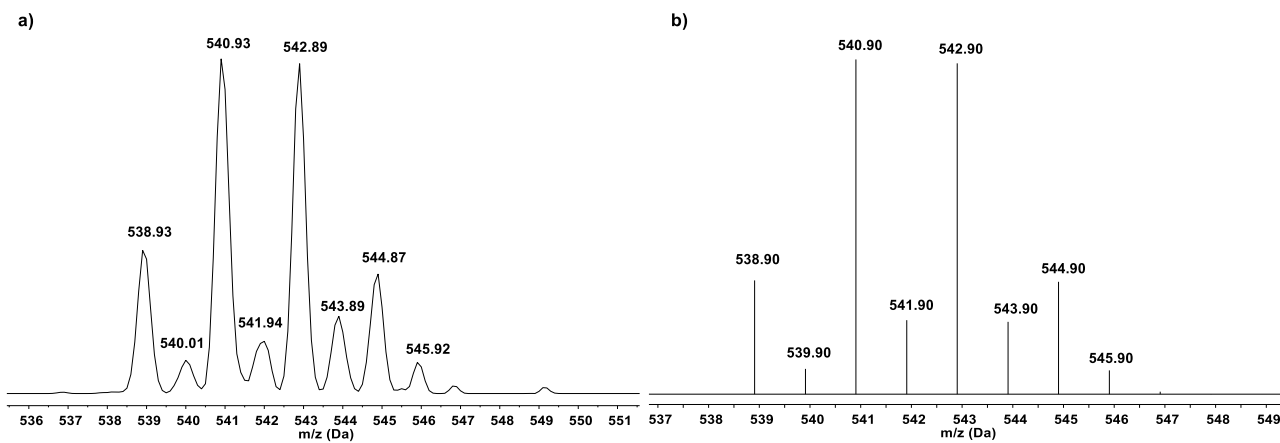

**Figure S82** a) Experimental, and b) calculated ESI-MS pattern of (*R*)-8 for  $[M+H]^+$  adducts in  $\text{CH}_3\text{CN}/0.1\%$   $\text{HCOOH}$ .

## 12.6 ESI-MS spectrum of (*R*)-9

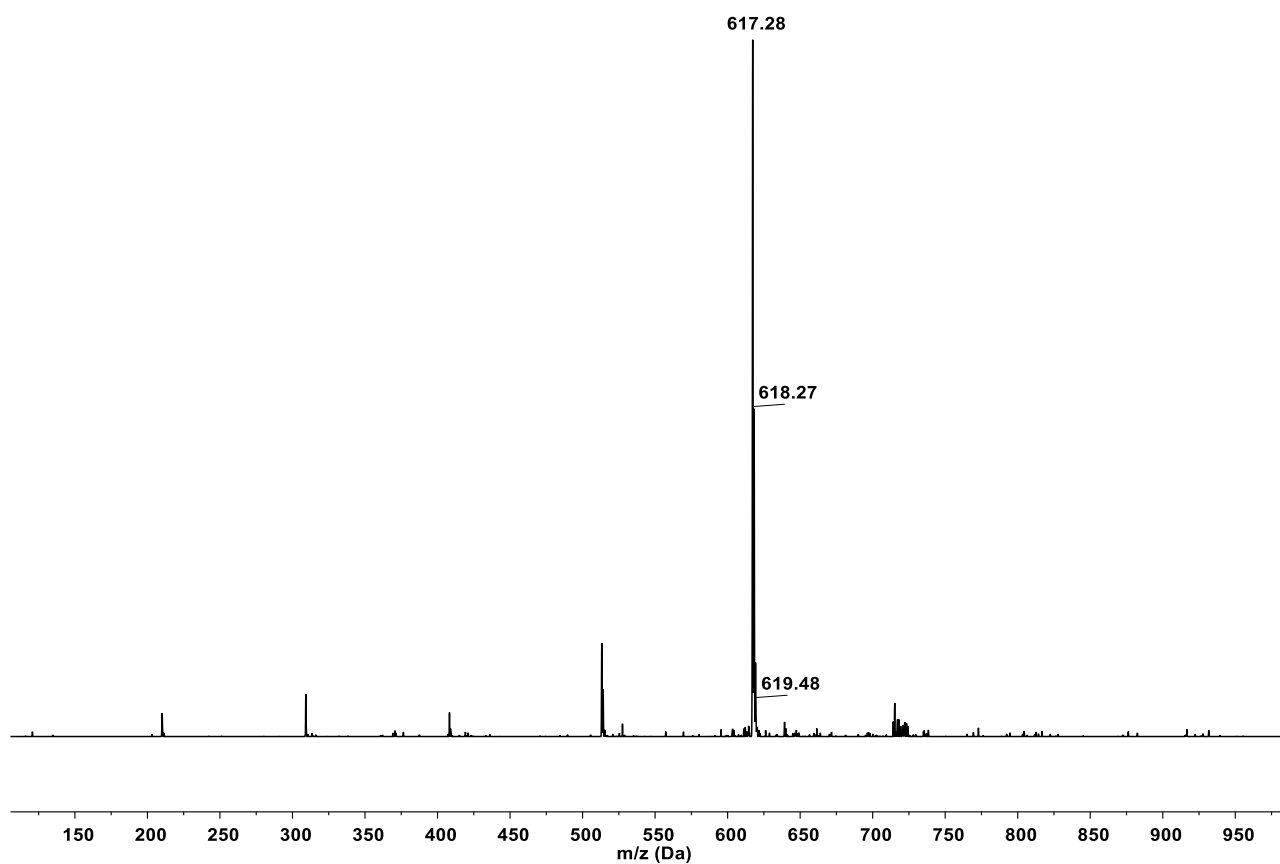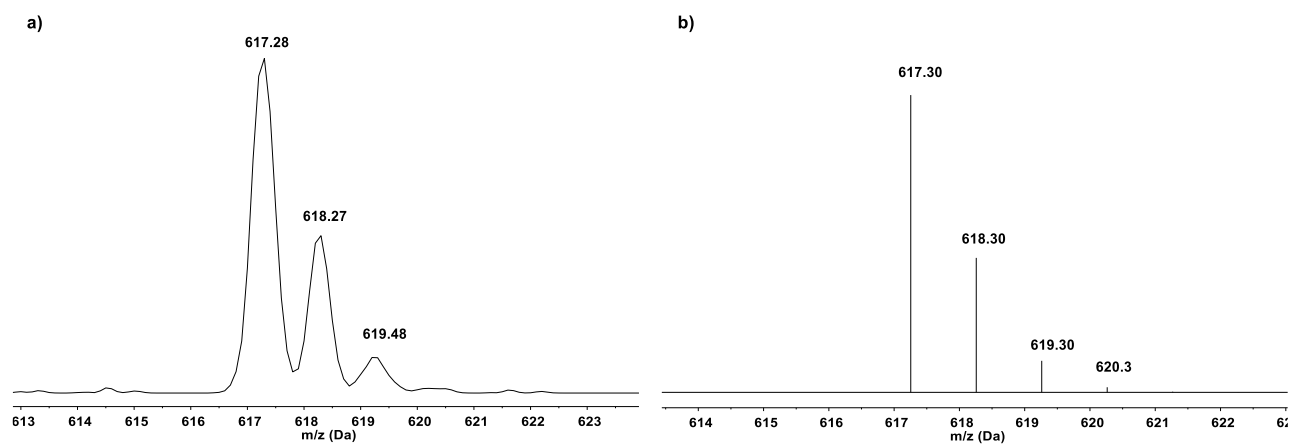

**Figure S83** a) Experimental, and b) calculated ESI-MS pattern of (*R*)-9 for  $[M+H]^+$  adducts in  $CH_3CN/0.1\%$   $HCOOH$ .

## 12.7 ESI-MS spectrum of (R)-1b

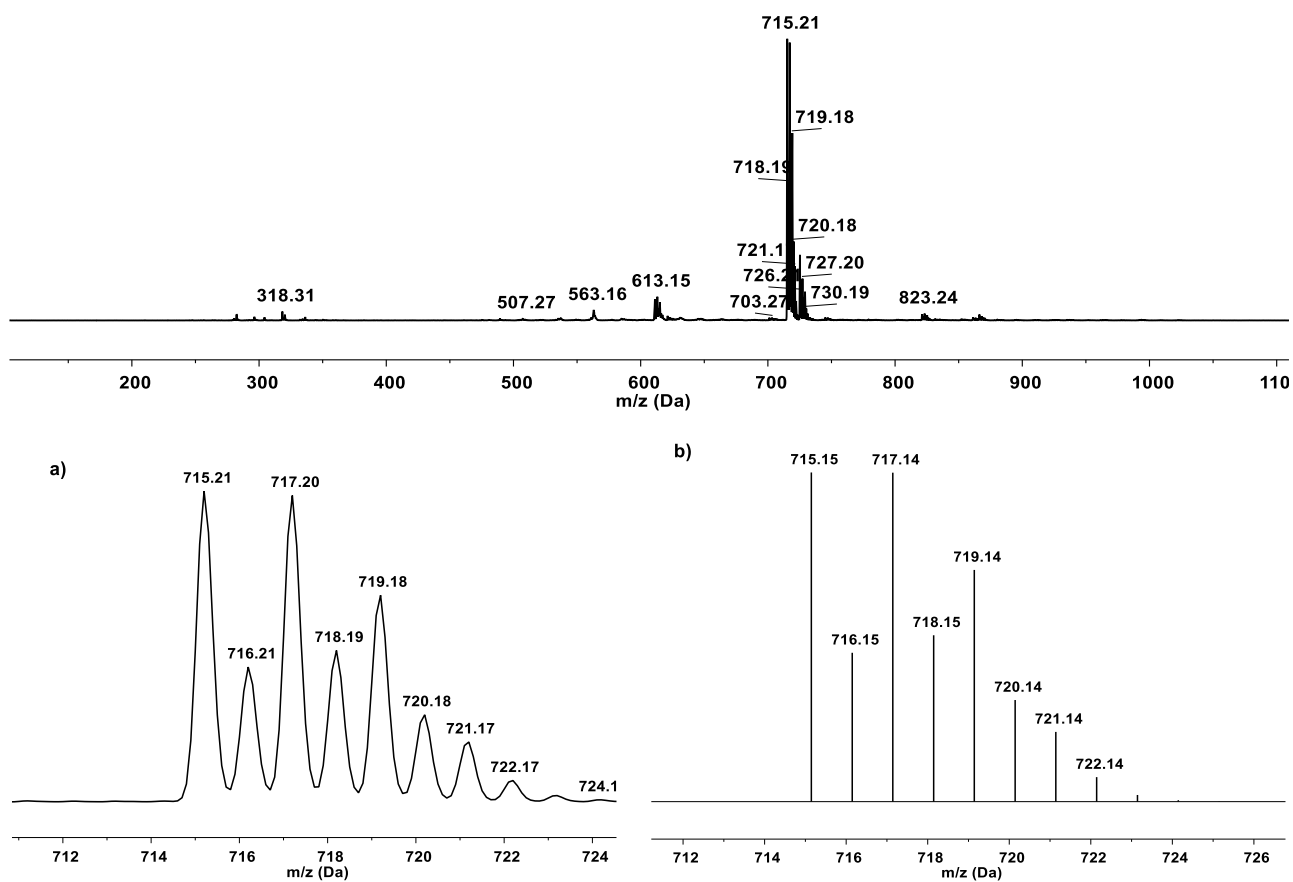

**Figure S84** a) Experimental, and b) calculated ESI-MS pattern of (R)-1b corresponding to [C<sub>40</sub>H<sub>32</sub>N<sub>4</sub>O<sub>3</sub>Zn + Cl]<sup>+</sup> in CH<sub>3</sub>CN/0.1% HCOOH.

## 12.8 ESI-MS spectrum of L-Tar@(*R,R*)-2b

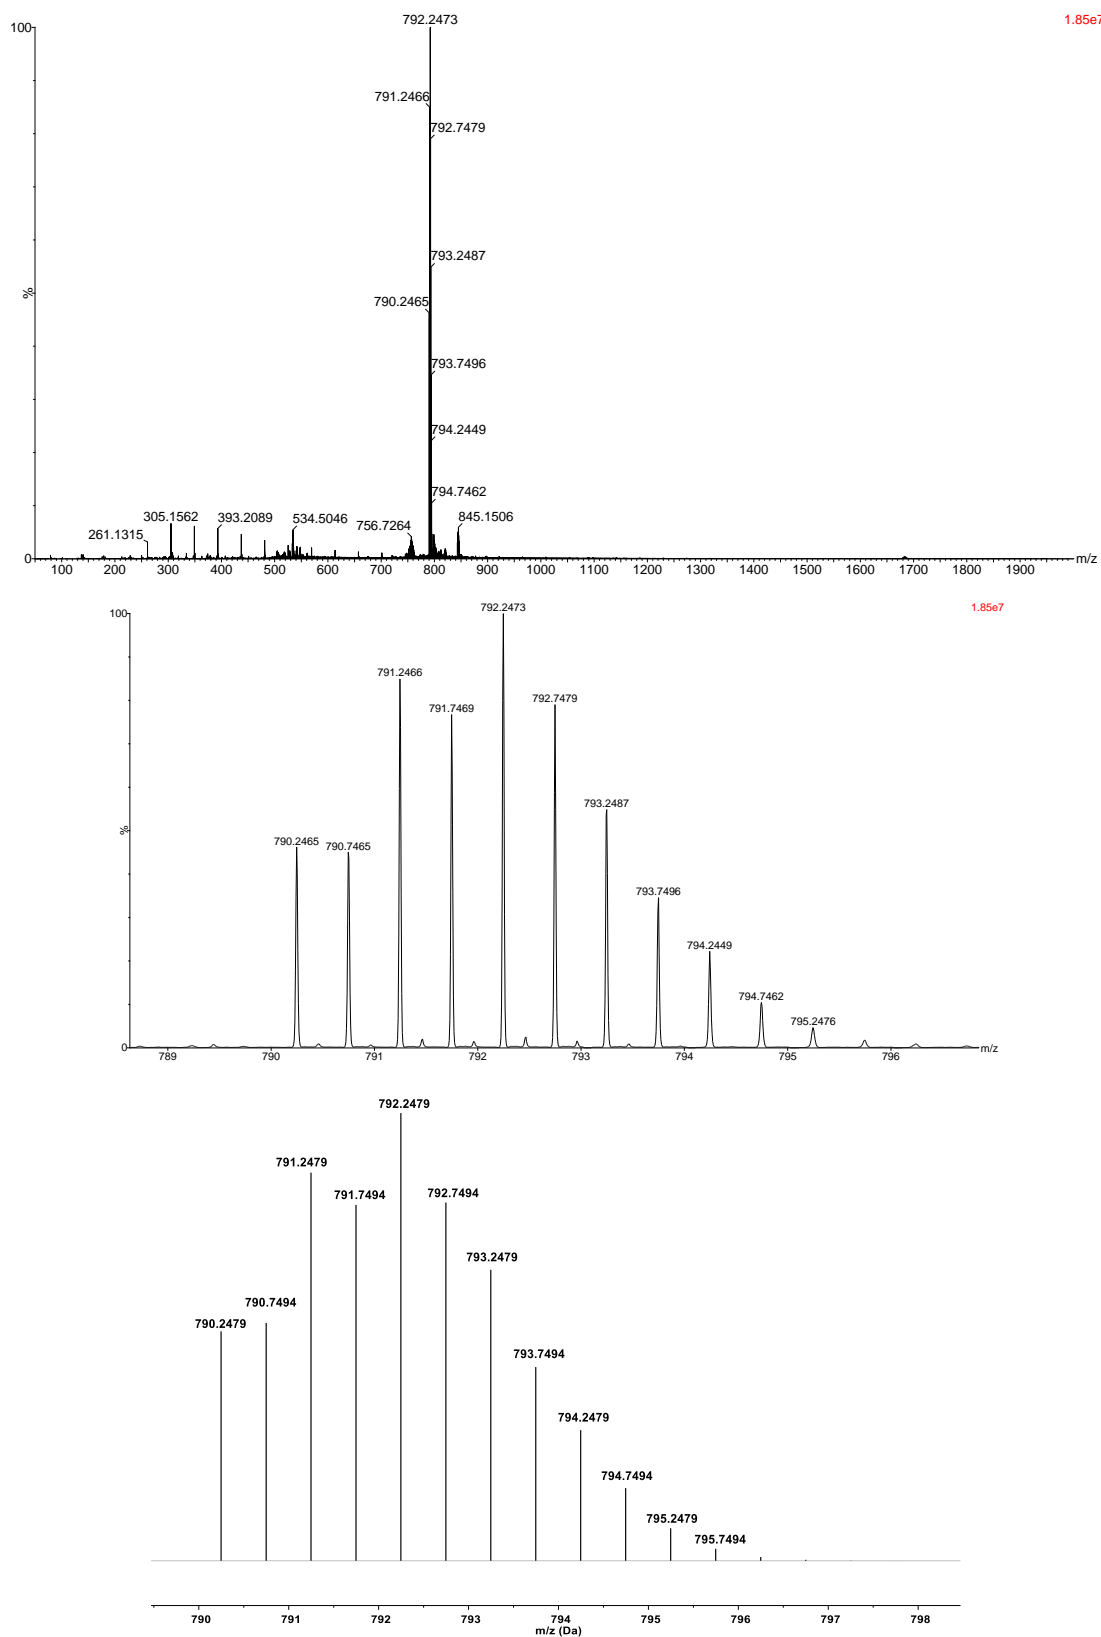

**Figure S85** Experimental (top), and calculated (bottom) HRMS (ESI-TOF) pattern of L-Tar@(*R,R*)-2b corresponding to  $[C_{90}H_{80}N_{14}O_6Zn_2]^{2+}$  in  $CH_3CN/0.1\% HCOOH$ .



## 13 References

- 1 Y. Pérez-Fuertes, A. M. Kelly, A. L. Johnson, S. Arimori, S. D. Bull and T. D. James, *Org. Lett.*, 2006, **8**, 609–612.
- 2 R. Evans, Z. Deng, A. K. Rogerson, A. S. McLachlan, J. J. Richards, M. Nilsson and G. A. Morris, *Angew. Chemie - Int. Ed.*, 2013, **52**, 3199–3202.
- 3 A. Macchioni, G. Ciancaleoni, C. Zuccaccia and D. Zuccaccia, *Chem. Soc. Rev.*, 2008, **37**, 479–489.
